# Supplementary material for: Identification of candidate genes and natural allelic variants for QTLs governing plant height in chickpea
Source: PubMed Central journal article supplement (PMC4913251; doi:10.1038/srep27968), 2016-06-20
Supplement: srep27968-s1.pdf [file srep27968-s1.pdf]

# **Identification of candidate genes and natural allelic variants for QTLs governing plant height in chickpea**

**Alice Kujur<sup>1</sup>, Hari D. Upadhyaya<sup>2</sup>, Deepak Bajaj<sup>1</sup>, C.L.L. Gowda<sup>2</sup>, Shivali Sharma<sup>2</sup>, Akhilesh K. Tyagi<sup>1</sup>, Swarup K. Parida<sup>1\*</sup>**

<sup>1</sup>National Institute of Plant Genome Research (NIPGR), Aruna Asaf Ali Marg, New Delhi 110067, India

<sup>2</sup>International Crops Research Institute for the Semi-Arid Tropics (ICRISAT), Patancheru 502324, Telangana, India

\*Corresponding author

**Table S1: A 3625 high-quality *desi* genome-derived GBS-SNPs mapped on an ultra-high density intra-specific genetic linkage map of chickpea**

| SNP IDs       | SNPs  | Linkage Group (LGs) | Genetic positions (cM) of mapped SNPs |
|---------------|-------|---------------------|---------------------------------------|
| Ca_Desi_SNP1  | [T/C] | <i>Ca_Desi_LG01</i> | 0.000                                 |
| Ca_Desi_SNP2  | [C/G] | <i>Ca_Desi_LG01</i> | 0.146                                 |
| Ca_Desi_SNP3  | [C/T] | <i>Ca_Desi_LG01</i> | 0.559                                 |
| Ca_Desi_SNP4  | [A/C] | <i>Ca_Desi_LG01</i> | 0.856                                 |
| Ca_Desi_SNP5  | [A/G] | <i>Ca_Desi_LG01</i> | 0.923                                 |
| Ca_Desi_SNP6  | [G/T] | <i>Ca_Desi_LG01</i> | 1.215                                 |
| Ca_Desi_SNP7  | [A/C] | <i>Ca_Desi_LG01</i> | 2.584                                 |
| Ca_Desi_SNP8  | [C/T] | <i>Ca_Desi_LG01</i> | 2.603                                 |
| Ca_Desi_SNP9  | [G/C] | <i>Ca_Desi_LG01</i> | 3.543                                 |
| Ca_Desi_SNP10 | [T/G] | <i>Ca_Desi_LG01</i> | 4.062                                 |
| Ca_Desi_SNP11 | [A/C] | <i>Ca_Desi_LG01</i> | 4.585                                 |
| Ca_Desi_SNP12 | [T/G] | <i>Ca_Desi_LG01</i> | 5.086                                 |
| Ca_Desi_SNP13 | [A/G] | <i>Ca_Desi_LG01</i> | 5.238                                 |
| Ca_Desi_SNP14 | [C/A] | <i>Ca_Desi_LG01</i> | 5.410                                 |
| Ca_Desi_SNP15 | [A/T] | <i>Ca_Desi_LG01</i> | 5.540                                 |
| Ca_Desi_SNP16 | [T/C] | <i>Ca_Desi_LG01</i> | 5.562                                 |
| Ca_Desi_SNP17 | [T/C] | <i>Ca_Desi_LG01</i> | 7.518                                 |
| Ca_Desi_SNP18 | [C/T] | <i>Ca_Desi_LG01</i> | 7.553                                 |
| Ca_Desi_SNP19 | [C/A] | <i>Ca_Desi_LG01</i> | 8.101                                 |
| Ca_Desi_SNP20 | [A/C] | <i>Ca_Desi_LG01</i> | 8.356                                 |
| Ca_Desi_SNP21 | [T/C] | <i>Ca_Desi_LG01</i> | 8.403                                 |
| Ca_Desi_SNP22 | [A/G] | <i>Ca_Desi_LG01</i> | 8.844                                 |
| Ca_Desi_SNP23 | [C/A] | <i>Ca_Desi_LG01</i> | 9.458                                 |
| Ca_Desi_SNP24 | [T/C] | <i>Ca_Desi_LG01</i> | 9.870                                 |
| Ca_Desi_SNP25 | [T/G] | <i>Ca_Desi_LG01</i> | 10.180                                |
| Ca_Desi_SNP26 | [T/G] | <i>Ca_Desi_LG01</i> | 10.209                                |
| Ca_Desi_SNP27 | [T/C] | <i>Ca_Desi_LG01</i> | 10.570                                |
| Ca_Desi_SNP28 | [T/C] | <i>Ca_Desi_LG01</i> | 10.835                                |
| Ca_Desi_SNP29 | [T/G] | <i>Ca_Desi_LG01</i> | 10.862                                |
| Ca_Desi_SNP30 | [A/G] | <i>Ca_Desi_LG01</i> | 12.036                                |
| Ca_Desi_SNP31 | [A/C] | <i>Ca_Desi_LG01</i> | 12.317                                |
| Ca_Desi_SNP32 | [T/C] | <i>Ca_Desi_LG01</i> | 12.508                                |
| Ca_Desi_SNP33 | [T/C] | <i>Ca_Desi_LG01</i> | 12.618                                |
| Ca_Desi_SNP34 | [T/C] | <i>Ca_Desi_LG01</i> | 12.694                                |
| Ca_Desi_SNP35 | [T/G] | <i>Ca_Desi_LG01</i> | 13.178                                |
| Ca_Desi_SNP36 | [T/C] | <i>Ca_Desi_LG01</i> | 13.207                                |
| Ca_Desi_SNP37 | [T/G] | <i>Ca_Desi_LG01</i> | 13.525                                |
| Ca_Desi_SNP38 | [T/C] | <i>Ca_Desi_LG01</i> | 13.649                                |
| Ca_Desi_SNP39 | [A/G] | <i>Ca_Desi_LG01</i> | 13.710                                |
| Ca_Desi_SNP40 | [A/G] | <i>Ca_Desi_LG01</i> | 13.733                                |
| Ca_Desi_SNP41 | [T/C] | <i>Ca_Desi_LG01</i> | 13.930                                |
| Ca_Desi_SNP42 | [G/A] | <i>Ca_Desi_LG01</i> | 14.480                                |
| Ca_Desi_SNP43 | [A/G] | <i>Ca_Desi_LG01</i> | 15.473                                |
| Ca_Desi_SNP44 | [T/A] | <i>Ca_Desi_LG01</i> | 15.641                                |
| Ca_Desi_SNP45 | [C/T] | <i>Ca_Desi_LG01</i> | 15.646                                |

| <b>SNP IDs</b> | <b>SNPs</b> | <b>Linkage Group (LGs)</b> | <b>Genetic positions (cM) of mapped SNPs</b> |
|----------------|-------------|----------------------------|----------------------------------------------|
| Ca_Desi_SNP46  | [A/T]       | <i>Ca_Desi_LG01</i>        | 15.953                                       |
| Ca_Desi_SNP47  | [T/C]       | <i>Ca_Desi_LG01</i>        | 16.168                                       |
| Ca_Desi_SNP48  | [C/A]       | <i>Ca_Desi_LG01</i>        | 16.247                                       |
| Ca_Desi_SNP49  | [A/C]       | <i>Ca_Desi_LG01</i>        | 16.247                                       |
| Ca_Desi_SNP50  | [A/G]       | <i>Ca_Desi_LG01</i>        | 16.385                                       |
| Ca_Desi_SNP51  | [G/T]       | <i>Ca_Desi_LG01</i>        | 16.460                                       |
| Ca_Desi_SNP52  | [C/T]       | <i>Ca_Desi_LG01</i>        | 16.521                                       |
| Ca_Desi_SNP53  | [T/G]       | <i>Ca_Desi_LG01</i>        | 16.666                                       |
| Ca_Desi_SNP54  | [A/C]       | <i>Ca_Desi_LG01</i>        | 16.737                                       |
| Ca_Desi_SNP55  | [C/A]       | <i>Ca_Desi_LG01</i>        | 16.820                                       |
| Ca_Desi_SNP56  | [A/G]       | <i>Ca_Desi_LG01</i>        | 16.833                                       |
| Ca_Desi_SNP57  | [G/A]       | <i>Ca_Desi_LG01</i>        | 17.345                                       |
| Ca_Desi_SNP58  | [A/T]       | <i>Ca_Desi_LG01</i>        | 17.452                                       |
| Ca_Desi_SNP59  | [T/C]       | <i>Ca_Desi_LG01</i>        | 17.519                                       |
| Ca_Desi_SNP60  | [A/C]       | <i>Ca_Desi_LG01</i>        | 17.522                                       |
| Ca_Desi_SNP61  | [G/T]       | <i>Ca_Desi_LG01</i>        | 18.048                                       |
| Ca_Desi_SNP62  | [A/G]       | <i>Ca_Desi_LG01</i>        | 18.485                                       |
| Ca_Desi_SNP63  | [G/T]       | <i>Ca_Desi_LG01</i>        | 18.616                                       |
| Ca_Desi_SNP64  | [T/C]       | <i>Ca_Desi_LG01</i>        | 18.686                                       |
| Ca_Desi_SNP65  | [T/G]       | <i>Ca_Desi_LG01</i>        | 18.796                                       |
| Ca_Desi_SNP66  | [A/G]       | <i>Ca_Desi_LG01</i>        | 19.017                                       |
| Ca_Desi_SNP67  | [T/C]       | <i>Ca_Desi_LG01</i>        | 19.215                                       |
| Ca_Desi_SNP68  | [T/G]       | <i>Ca_Desi_LG01</i>        | 19.319                                       |
| Ca_Desi_SNP69  | [G/C]       | <i>Ca_Desi_LG01</i>        | 19.335                                       |
| Ca_Desi_SNP70  | [T/C]       | <i>Ca_Desi_LG01</i>        | 19.570                                       |
| Ca_Desi_SNP71  | [C/T]       | <i>Ca_Desi_LG01</i>        | 19.738                                       |
| Ca_Desi_SNP72  | [G/A]       | <i>Ca_Desi_LG01</i>        | 19.751                                       |
| Ca_Desi_SNP73  | [A/G]       | <i>Ca_Desi_LG01</i>        | 20.095                                       |
| Ca_Desi_SNP74  | [A/G]       | <i>Ca_Desi_LG01</i>        | 20.246                                       |
| Ca_Desi_SNP75  | [A/C]       | <i>Ca_Desi_LG01</i>        | 20.251                                       |
| Ca_Desi_SNP76  | [A/G]       | <i>Ca_Desi_LG01</i>        | 20.446                                       |
| Ca_Desi_SNP77  | [G/C]       | <i>Ca_Desi_LG01</i>        | 20.499                                       |
| Ca_Desi_SNP78  | [A/G]       | <i>Ca_Desi_LG01</i>        | 20.697                                       |
| Ca_Desi_SNP79  | [C/A]       | <i>Ca_Desi_LG01</i>        | 20.789                                       |
| Ca_Desi_SNP80  | [A/G]       | <i>Ca_Desi_LG01</i>        | 20.876                                       |
| Ca_Desi_SNP81  | [C/T]       | <i>Ca_Desi_LG01</i>        | 20.950                                       |
| Ca_Desi_SNP82  | [T/C]       | <i>Ca_Desi_LG01</i>        | 21.033                                       |
| Ca_Desi_SNP83  | [A/G]       | <i>Ca_Desi_LG01</i>        | 21.062                                       |
| Ca_Desi_SNP84  | [T/C]       | <i>Ca_Desi_LG01</i>        | 21.063                                       |
| Ca_Desi_SNP85  | [T/C]       | <i>Ca_Desi_LG01</i>        | 21.137                                       |
| Ca_Desi_SNP86  | [T/G]       | <i>Ca_Desi_LG01</i>        | 21.157                                       |
| Ca_Desi_SNP87  | [T/G]       | <i>Ca_Desi_LG01</i>        | 21.184                                       |
| Ca_Desi_SNP88  | [C/A]       | <i>Ca_Desi_LG01</i>        | 21.275                                       |
| Ca_Desi_SNP89  | [T/C]       | <i>Ca_Desi_LG01</i>        | 21.376                                       |
| Ca_Desi_SNP90  | [A/C]       | <i>Ca_Desi_LG01</i>        | 21.388                                       |
| Ca_Desi_SNP91  | [G/C]       | <i>Ca_Desi_LG01</i>        | 21.590                                       |
| Ca_Desi_SNP92  | [A/G]       | <i>Ca_Desi_LG01</i>        | 21.631                                       |
| Ca_Desi_SNP93  | [T/G]       | <i>Ca_Desi_LG01</i>        | 21.779                                       |

| <b>SNP IDs</b>  | <b>SNPs</b> | <b>Linkage Group (LGs)</b> | <b>Genetic positions (cM) of mapped SNPs</b> |
|-----------------|-------------|----------------------------|----------------------------------------------|
| Ca_Desig_SNP94  | [G/T]       | Ca_Desig_LG01              | 22.083                                       |
| Ca_Desig_SNP95  | [T/C]       | Ca_Desig_LG01              | 22.101                                       |
| Ca_Desig_SNP96  | [G/T]       | Ca_Desig_LG01              | 22.270                                       |
| Ca_Desig_SNP97  | [A/C]       | Ca_Desig_LG01              | 22.343                                       |
| Ca_Desig_SNP98  | [T/G]       | Ca_Desig_LG01              | 22.501                                       |
| Ca_Desig_SNP99  | [C/T]       | Ca_Desig_LG01              | 22.503                                       |
| Ca_Desig_SNP100 | [G/T]       | Ca_Desig_LG01              | 22.516                                       |
| Ca_Desig_SNP101 | [G/T]       | Ca_Desig_LG01              | 22.550                                       |
| Ca_Desig_SNP102 | [A/G]       | Ca_Desig_LG01              | 22.554                                       |
| Ca_Desig_SNP103 | [A/C]       | Ca_Desig_LG01              | 22.645                                       |
| Ca_Desig_SNP104 | [T/C]       | Ca_Desig_LG01              | 22.695                                       |
| Ca_Desig_SNP105 | [G/C]       | Ca_Desig_LG01              | 22.775                                       |
| Ca_Desig_SNP106 | [C/T]       | Ca_Desig_LG01              | 22.854                                       |
| Ca_Desig_SNP107 | [A/G]       | Ca_Desig_LG01              | 22.861                                       |
| Ca_Desig_SNP108 | [A/G]       | Ca_Desig_LG01              | 22.911                                       |
| Ca_Desig_SNP109 | [C/G]       | Ca_Desig_LG01              | 22.938                                       |
| Ca_Desig_SNP110 | [A/C]       | Ca_Desig_LG01              | 23.190                                       |
| Ca_Desig_SNP111 | [A/C]       | Ca_Desig_LG01              | 23.224                                       |
| Ca_Desig_SNP112 | [A/C]       | Ca_Desig_LG01              | 23.297                                       |
| Ca_Desig_SNP113 | [T/C]       | Ca_Desig_LG01              | 23.469                                       |
| Ca_Desig_SNP114 | [G/A]       | Ca_Desig_LG01              | 23.498                                       |
| Ca_Desig_SNP115 | [G/A]       | Ca_Desig_LG01              | 23.577                                       |
| Ca_Desig_SNP116 | [A/C]       | Ca_Desig_LG01              | 23.580                                       |
| Ca_Desig_SNP117 | [C/T]       | Ca_Desig_LG01              | 23.647                                       |
| Ca_Desig_SNP118 | [A/G]       | Ca_Desig_LG01              | 23.756                                       |
| Ca_Desig_SNP119 | [G/A]       | Ca_Desig_LG01              | 23.826                                       |
| Ca_Desig_SNP120 | [T/C]       | Ca_Desig_LG01              | 23.840                                       |
| Ca_Desig_SNP121 | [G/T]       | Ca_Desig_LG01              | 23.886                                       |
| Ca_Desig_SNP122 | [T/C]       | Ca_Desig_LG01              | 24.023                                       |
| Ca_Desig_SNP123 | [C/T]       | Ca_Desig_LG01              | 24.050                                       |
| Ca_Desig_SNP124 | [T/G]       | Ca_Desig_LG01              | 24.127                                       |
| Ca_Desig_SNP125 | [T/C]       | Ca_Desig_LG01              | 24.187                                       |
| Ca_Desig_SNP126 | [A/G]       | Ca_Desig_LG01              | 24.256                                       |
| Ca_Desig_SNP127 | [A/C]       | Ca_Desig_LG01              | 24.391                                       |
| Ca_Desig_SNP128 | [C/T]       | Ca_Desig_LG01              | 24.501                                       |
| Ca_Desig_SNP129 | [C/A]       | Ca_Desig_LG01              | 24.568                                       |
| Ca_Desig_SNP130 | [A/G]       | Ca_Desig_LG01              | 24.774                                       |
| Ca_Desig_SNP131 | [C/T]       | Ca_Desig_LG01              | 24.813                                       |
| Ca_Desig_SNP132 | [T/C]       | Ca_Desig_LG01              | 24.909                                       |
| Ca_Desig_SNP133 | [A/G]       | Ca_Desig_LG01              | 24.977                                       |
| Ca_Desig_SNP134 | [C/T]       | Ca_Desig_LG01              | 25.031                                       |
| Ca_Desig_SNP135 | [T/C]       | Ca_Desig_LG01              | 25.220                                       |
| Ca_Desig_SNP136 | [A/C]       | Ca_Desig_LG01              | 25.243                                       |
| Ca_Desig_SNP137 | [G/T]       | Ca_Desig_LG01              | 25.380                                       |
| Ca_Desig_SNP138 | [A/G]       | Ca_Desig_LG01              | 25.394                                       |
| Ca_Desig_SNP139 | [G/A]       | Ca_Desig_LG01              | 25.489                                       |
| Ca_Desig_SNP140 | [T/C]       | Ca_Desig_LG01              | 25.750                                       |
| Ca_Desig_SNP141 | [T/C]       | Ca_Desig_LG01              | 25.792                                       |

| <b>SNP IDs</b> | <b>SNPs</b> | <b>Linkage Group (LGs)</b> | <b>Genetic positions (cM) of mapped SNPs</b> |
|----------------|-------------|----------------------------|----------------------------------------------|
| Ca_Desi_SNP142 | [T/C]       | <i>Ca_Desi_LG01</i>        | 25.834                                       |
| Ca_Desi_SNP143 | [T/C]       | <i>Ca_Desi_LG01</i>        | 25.904                                       |
| Ca_Desi_SNP144 | [T/A]       | <i>Ca_Desi_LG01</i>        | 25.933                                       |
| Ca_Desi_SNP145 | [A/G]       | <i>Ca_Desi_LG01</i>        | 25.970                                       |
| Ca_Desi_SNP146 | [C/T]       | <i>Ca_Desi_LG01</i>        | 26.034                                       |
| Ca_Desi_SNP147 | [T/G]       | <i>Ca_Desi_LG01</i>        | 26.129                                       |
| Ca_Desi_SNP148 | [C/A]       | <i>Ca_Desi_LG01</i>        | 26.146                                       |
| Ca_Desi_SNP149 | [T/G]       | <i>Ca_Desi_LG01</i>        | 26.198                                       |
| Ca_Desi_SNP150 | [T/G]       | <i>Ca_Desi_LG01</i>        | 26.418                                       |
| Ca_Desi_SNP151 | [T/C]       | <i>Ca_Desi_LG01</i>        | 26.510                                       |
| Ca_Desi_SNP152 | [A/G]       | <i>Ca_Desi_LG01</i>        | 26.521                                       |
| Ca_Desi_SNP153 | [A/G]       | <i>Ca_Desi_LG01</i>        | 26.553                                       |
| Ca_Desi_SNP154 | [C/G]       | <i>Ca_Desi_LG01</i>        | 26.678                                       |
| Ca_Desi_SNP155 | [A/C]       | <i>Ca_Desi_LG01</i>        | 26.686                                       |
| Ca_Desi_SNP156 | [G/T]       | <i>Ca_Desi_LG01</i>        | 26.745                                       |
| Ca_Desi_SNP157 | [G/C]       | <i>Ca_Desi_LG01</i>        | 26.903                                       |
| Ca_Desi_SNP158 | [G/A]       | <i>Ca_Desi_LG01</i>        | 26.972                                       |
| Ca_Desi_SNP159 | [A/G]       | <i>Ca_Desi_LG01</i>        | 27.048                                       |
| Ca_Desi_SNP160 | [C/T]       | <i>Ca_Desi_LG01</i>        | 27.105                                       |
| Ca_Desi_SNP161 | [G/T]       | <i>Ca_Desi_LG01</i>        | 27.239                                       |
| Ca_Desi_SNP162 | [T/C]       | <i>Ca_Desi_LG01</i>        | 27.283                                       |
| Ca_Desi_SNP163 | [T/C]       | <i>Ca_Desi_LG01</i>        | 27.329                                       |
| Ca_Desi_SNP164 | [A/C]       | <i>Ca_Desi_LG01</i>        | 27.545                                       |
| Ca_Desi_SNP165 | [T/C]       | <i>Ca_Desi_LG01</i>        | 27.580                                       |
| Ca_Desi_SNP166 | [T/G]       | <i>Ca_Desi_LG01</i>        | 27.676                                       |
| Ca_Desi_SNP167 | [A/G]       | <i>Ca_Desi_LG01</i>        | 27.789                                       |
| Ca_Desi_SNP168 | [A/C]       | <i>Ca_Desi_LG01</i>        | 27.892                                       |
| Ca_Desi_SNP169 | [G/A]       | <i>Ca_Desi_LG01</i>        | 28.100                                       |
| Ca_Desi_SNP170 | [C/A]       | <i>Ca_Desi_LG01</i>        | 28.135                                       |
| Ca_Desi_SNP171 | [T/C]       | <i>Ca_Desi_LG01</i>        | 28.158                                       |
| Ca_Desi_SNP172 | [A/G]       | <i>Ca_Desi_LG01</i>        | 28.166                                       |
| Ca_Desi_SNP173 | [A/C]       | <i>Ca_Desi_LG01</i>        | 28.195                                       |
| Ca_Desi_SNP174 | [A/G]       | <i>Ca_Desi_LG01</i>        | 28.307                                       |
| Ca_Desi_SNP175 | [T/C]       | <i>Ca_Desi_LG01</i>        | 28.428                                       |
| Ca_Desi_SNP176 | [G/C]       | <i>Ca_Desi_LG01</i>        | 28.485                                       |
| Ca_Desi_SNP177 | [T/C]       | <i>Ca_Desi_LG01</i>        | 28.644                                       |
| Ca_Desi_SNP178 | [A/T]       | <i>Ca_Desi_LG01</i>        | 28.784                                       |
| Ca_Desi_SNP179 | [A/G]       | <i>Ca_Desi_LG01</i>        | 28.870                                       |
| Ca_Desi_SNP180 | [G/T]       | <i>Ca_Desi_LG01</i>        | 29.009                                       |
| Ca_Desi_SNP181 | [T/G]       | <i>Ca_Desi_LG01</i>        | 29.069                                       |
| Ca_Desi_SNP182 | [C/T]       | <i>Ca_Desi_LG01</i>        | 29.166                                       |
| Ca_Desi_SNP183 | [T/C]       | <i>Ca_Desi_LG01</i>        | 29.285                                       |
| Ca_Desi_SNP184 | [A/G]       | <i>Ca_Desi_LG01</i>        | 29.306                                       |
| Ca_Desi_SNP185 | [A/G]       | <i>Ca_Desi_LG01</i>        | 29.321                                       |
| Ca_Desi_SNP186 | [T/C]       | <i>Ca_Desi_LG01</i>        | 29.326                                       |
| Ca_Desi_SNP187 | [G/C]       | <i>Ca_Desi_LG01</i>        | 29.349                                       |
| Ca_Desi_SNP188 | [G/A]       | <i>Ca_Desi_LG01</i>        | 29.359                                       |
| Ca_Desi_SNP189 | [T/G]       | <i>Ca_Desi_LG01</i>        | 29.372                                       |

| <b>SNP IDs</b>  | <b>SNPs</b> | <b>Linkage Group (LGs)</b> | <b>Genetic positions (cM) of mapped SNPs</b> |
|-----------------|-------------|----------------------------|----------------------------------------------|
| Ca_Desig_SNP190 | [A/T]       | Ca_Desig_LG01              | 29.427                                       |
| Ca_Desig_SNP191 | [G/A]       | Ca_Desig_LG01              | 29.612                                       |
| Ca_Desig_SNP192 | [A/C]       | Ca_Desig_LG01              | 29.709                                       |
| Ca_Desig_SNP193 | [A/G]       | Ca_Desig_LG01              | 29.772                                       |
| Ca_Desig_SNP194 | [A/C]       | Ca_Desig_LG01              | 29.881                                       |
| Ca_Desig_SNP195 | [T/A]       | Ca_Desig_LG01              | 29.923                                       |
| Ca_Desig_SNP196 | [A/C]       | Ca_Desig_LG01              | 29.977                                       |
| Ca_Desig_SNP197 | [T/G]       | Ca_Desig_LG01              | 29.978                                       |
| Ca_Desig_SNP198 | [A/C]       | Ca_Desig_LG01              | 30.017                                       |
| Ca_Desig_SNP199 | [T/G]       | Ca_Desig_LG01              | 30.020                                       |
| Ca_Desig_SNP200 | [T/C]       | Ca_Desig_LG01              | 30.034                                       |
| Ca_Desig_SNP201 | [A/C]       | Ca_Desig_LG01              | 30.164                                       |
| Ca_Desig_SNP202 | [C/G]       | Ca_Desig_LG01              | 30.186                                       |
| Ca_Desig_SNP203 | [A/G]       | Ca_Desig_LG01              | 30.456                                       |
| Ca_Desig_SNP204 | [T/G]       | Ca_Desig_LG01              | 30.463                                       |
| Ca_Desig_SNP205 | [T/G]       | Ca_Desig_LG01              | 30.466                                       |
| Ca_Desig_SNP206 | [A/G]       | Ca_Desig_LG01              | 30.555                                       |
| Ca_Desig_SNP207 | [C/T]       | Ca_Desig_LG01              | 30.735                                       |
| Ca_Desig_SNP208 | [T/G]       | Ca_Desig_LG01              | 30.777                                       |
| Ca_Desig_SNP209 | [T/G]       | Ca_Desig_LG01              | 30.918                                       |
| Ca_Desig_SNP210 | [C/T]       | Ca_Desig_LG01              | 30.946                                       |
| Ca_Desig_SNP211 | [C/T]       | Ca_Desig_LG01              | 31.129                                       |
| Ca_Desig_SNP212 | [C/A]       | Ca_Desig_LG01              | 31.156                                       |
| Ca_Desig_SNP213 | [A/T]       | Ca_Desig_LG01              | 31.237                                       |
| Ca_Desig_SNP214 | [T/G]       | Ca_Desig_LG01              | 31.367                                       |
| Ca_Desig_SNP215 | [G/C]       | Ca_Desig_LG01              | 31.532                                       |
| Ca_Desig_SNP216 | [T/G]       | Ca_Desig_LG01              | 31.546                                       |
| Ca_Desig_SNP217 | [A/G]       | Ca_Desig_LG01              | 31.566                                       |
| Ca_Desig_SNP218 | [C/T]       | Ca_Desig_LG01              | 31.666                                       |
| Ca_Desig_SNP219 | [A/T]       | Ca_Desig_LG01              | 31.702                                       |
| Ca_Desig_SNP220 | [C/G]       | Ca_Desig_LG01              | 31.825                                       |
| Ca_Desig_SNP221 | [T/C]       | Ca_Desig_LG01              | 31.851                                       |
| Ca_Desig_SNP222 | [T/C]       | Ca_Desig_LG01              | 31.870                                       |
| Ca_Desig_SNP223 | [A/G]       | Ca_Desig_LG01              | 31.957                                       |
| Ca_Desig_SNP224 | [T/C]       | Ca_Desig_LG01              | 32.027                                       |
| Ca_Desig_SNP225 | [T/A]       | Ca_Desig_LG01              | 32.033                                       |
| Ca_Desig_SNP226 | [C/T]       | Ca_Desig_LG01              | 32.056                                       |
| Ca_Desig_SNP227 | [A/G]       | Ca_Desig_LG01              | 32.080                                       |
| Ca_Desig_SNP228 | [A/C]       | Ca_Desig_LG01              | 32.190                                       |
| Ca_Desig_SNP229 | [T/C]       | Ca_Desig_LG01              | 32.328                                       |
| Ca_Desig_SNP230 | [C/T]       | Ca_Desig_LG01              | 32.362                                       |
| Ca_Desig_SNP231 | [G/T]       | Ca_Desig_LG01              | 32.398                                       |
| Ca_Desig_SNP232 | [A/C]       | Ca_Desig_LG01              | 32.448                                       |
| Ca_Desig_SNP233 | [A/G]       | Ca_Desig_LG01              | 32.460                                       |
| Ca_Desig_SNP234 | [T/A]       | Ca_Desig_LG01              | 32.495                                       |
| Ca_Desig_SNP235 | [G/A]       | Ca_Desig_LG01              | 32.501                                       |
| Ca_Desig_SNP236 | [A/C]       | Ca_Desig_LG01              | 32.707                                       |
| Ca_Desig_SNP237 | [G/T]       | Ca_Desig_LG01              | 32.956                                       |

| <b>SNP IDs</b>  | <b>SNPs</b> | <b>Linkage Group (LGs)</b> | <b>Genetic positions (cM) of mapped SNPs</b> |
|-----------------|-------------|----------------------------|----------------------------------------------|
| Ca_Desig_SNP238 | [A/G]       | Ca_Desig_LG01              | 32.989                                       |
| Ca_Desig_SNP239 | [T/A]       | Ca_Desig_LG01              | 33.102                                       |
| Ca_Desig_SNP240 | [T/C]       | Ca_Desig_LG01              | 33.139                                       |
| Ca_Desig_SNP241 | [C/G]       | Ca_Desig_LG01              | 33.241                                       |
| Ca_Desig_SNP242 | [G/A]       | Ca_Desig_LG01              | 33.301                                       |
| Ca_Desig_SNP243 | [A/T]       | Ca_Desig_LG01              | 33.324                                       |
| Ca_Desig_SNP244 | [G/A]       | Ca_Desig_LG01              | 33.376                                       |
| Ca_Desig_SNP245 | [G/A]       | Ca_Desig_LG01              | 33.427                                       |
| Ca_Desig_SNP246 | [G/A]       | Ca_Desig_LG01              | 33.642                                       |
| Ca_Desig_SNP247 | [T/C]       | Ca_Desig_LG01              | 33.751                                       |
| Ca_Desig_SNP248 | [A/C]       | Ca_Desig_LG01              | 34.019                                       |
| Ca_Desig_SNP249 | [A/G]       | Ca_Desig_LG01              | 34.247                                       |
| Ca_Desig_SNP250 | [C/G]       | Ca_Desig_LG01              | 34.293                                       |
| Ca_Desig_SNP251 | [C/A]       | Ca_Desig_LG01              | 34.372                                       |
| Ca_Desig_SNP252 | [C/T]       | Ca_Desig_LG01              | 34.453                                       |
| Ca_Desig_SNP253 | [A/G]       | Ca_Desig_LG01              | 34.466                                       |
| Ca_Desig_SNP254 | [C/A]       | Ca_Desig_LG01              | 34.520                                       |
| Ca_Desig_SNP255 | [A/C]       | Ca_Desig_LG01              | 34.683                                       |
| Ca_Desig_SNP256 | [T/C]       | Ca_Desig_LG01              | 34.918                                       |
| Ca_Desig_SNP257 | [C/T]       | Ca_Desig_LG01              | 35.214                                       |
| Ca_Desig_SNP258 | [C/T]       | Ca_Desig_LG01              | 35.417                                       |
| Ca_Desig_SNP259 | [A/C]       | Ca_Desig_LG01              | 35.478                                       |
| Ca_Desig_SNP260 | [T/G]       | Ca_Desig_LG01              | 35.536                                       |
| Ca_Desig_SNP261 | [G/A]       | Ca_Desig_LG01              | 35.554                                       |
| Ca_Desig_SNP262 | [T/G]       | Ca_Desig_LG01              | 35.782                                       |
| Ca_Desig_SNP263 | [A/G]       | Ca_Desig_LG01              | 36.163                                       |
| Ca_Desig_SNP264 | [A/G]       | Ca_Desig_LG01              | 36.358                                       |
| Ca_Desig_SNP265 | [T/C]       | Ca_Desig_LG01              | 36.514                                       |
| Ca_Desig_SNP266 | [C/T]       | Ca_Desig_LG01              | 36.525                                       |
| Ca_Desig_SNP267 | [C/T]       | Ca_Desig_LG01              | 36.560                                       |
| Ca_Desig_SNP268 | [A/C]       | Ca_Desig_LG01              | 36.582                                       |
| Ca_Desig_SNP269 | [G/A]       | Ca_Desig_LG01              | 36.653                                       |
| Ca_Desig_SNP270 | [G/A]       | Ca_Desig_LG01              | 36.698                                       |
| Ca_Desig_SNP271 | [T/G]       | Ca_Desig_LG01              | 36.743                                       |
| Ca_Desig_SNP272 | [C/G]       | Ca_Desig_LG01              | 36.750                                       |
| Ca_Desig_SNP273 | [A/G]       | Ca_Desig_LG01              | 36.796                                       |
| Ca_Desig_SNP274 | [A/C]       | Ca_Desig_LG01              | 36.836                                       |
| Ca_Desig_SNP275 | [G/A]       | Ca_Desig_LG01              | 36.879                                       |
| Ca_Desig_SNP276 | [A/C]       | Ca_Desig_LG01              | 36.964                                       |
| Ca_Desig_SNP277 | [T/C]       | Ca_Desig_LG01              | 37.126                                       |
| Ca_Desig_SNP278 | [T/C]       | Ca_Desig_LG01              | 37.132                                       |
| Ca_Desig_SNP279 | [T/C]       | Ca_Desig_LG01              | 37.136                                       |
| Ca_Desig_SNP280 | [A/G]       | Ca_Desig_LG01              | 37.646                                       |
| Ca_Desig_SNP281 | [C/A]       | Ca_Desig_LG01              | 37.674                                       |
| Ca_Desig_SNP282 | [G/C]       | Ca_Desig_LG01              | 37.748                                       |
| Ca_Desig_SNP283 | [A/G]       | Ca_Desig_LG01              | 37.762                                       |
| Ca_Desig_SNP284 | [C/T]       | Ca_Desig_LG01              | 37.964                                       |
| Ca_Desig_SNP285 | [T/A]       | Ca_Desig_LG01              | 38.033                                       |

| <b>SNP IDs</b> | <b>SNPs</b> | <b>Linkage Group (LGs)</b> | <b>Genetic positions (cM) of mapped SNPs</b> |
|----------------|-------------|----------------------------|----------------------------------------------|
| Ca_Desi_SNP286 | [T/A]       | <i>Ca_Desi_LG01</i>        | 38.049                                       |
| Ca_Desi_SNP287 | [T/C]       | <i>Ca_Desi_LG01</i>        | 38.051                                       |
| Ca_Desi_SNP288 | [C/T]       | <i>Ca_Desi_LG01</i>        | 38.142                                       |
| Ca_Desi_SNP289 | [C/T]       | <i>Ca_Desi_LG01</i>        | 38.376                                       |
| Ca_Desi_SNP290 | [A/T]       | <i>Ca_Desi_LG01</i>        | 38.702                                       |
| Ca_Desi_SNP291 | [G/C]       | <i>Ca_Desi_LG01</i>        | 38.731                                       |
| Ca_Desi_SNP292 | [A/C]       | <i>Ca_Desi_LG01</i>        | 38.810                                       |
| Ca_Desi_SNP293 | [C/T]       | <i>Ca_Desi_LG01</i>        | 38.827                                       |
| Ca_Desi_SNP294 | [C/G]       | <i>Ca_Desi_LG01</i>        | 39.080                                       |
| Ca_Desi_SNP295 | [C/T]       | <i>Ca_Desi_LG01</i>        | 39.127                                       |
| Ca_Desi_SNP296 | [A/G]       | <i>Ca_Desi_LG01</i>        | 39.166                                       |
| Ca_Desi_SNP297 | [A/G]       | <i>Ca_Desi_LG01</i>        | 39.397                                       |
| Ca_Desi_SNP298 | [G/T]       | <i>Ca_Desi_LG01</i>        | 39.425                                       |
| Ca_Desi_SNP299 | [A/C]       | <i>Ca_Desi_LG01</i>        | 39.439                                       |
| Ca_Desi_SNP300 | [G/A]       | <i>Ca_Desi_LG01</i>        | 39.484                                       |
| Ca_Desi_SNP301 | [A/C]       | <i>Ca_Desi_LG01</i>        | 39.506                                       |
| Ca_Desi_SNP302 | [A/G]       | <i>Ca_Desi_LG01</i>        | 39.508                                       |
| Ca_Desi_SNP303 | [A/C]       | <i>Ca_Desi_LG01</i>        | 39.538                                       |
| Ca_Desi_SNP304 | [T/G]       | <i>Ca_Desi_LG01</i>        | 39.610                                       |
| Ca_Desi_SNP305 | [C/T]       | <i>Ca_Desi_LG01</i>        | 39.719                                       |
| Ca_Desi_SNP306 | [G/A]       | <i>Ca_Desi_LG01</i>        | 39.793                                       |
| Ca_Desi_SNP307 | [A/G]       | <i>Ca_Desi_LG01</i>        | 39.842                                       |
| Ca_Desi_SNP308 | [G/C]       | <i>Ca_Desi_LG01</i>        | 39.893                                       |
| Ca_Desi_SNP309 | [G/T]       | <i>Ca_Desi_LG01</i>        | 39.980                                       |
| Ca_Desi_SNP310 | [T/C]       | <i>Ca_Desi_LG01</i>        | 40.186                                       |
| Ca_Desi_SNP311 | [A/G]       | <i>Ca_Desi_LG01</i>        | 40.216                                       |
| Ca_Desi_SNP312 | [T/C]       | <i>Ca_Desi_LG01</i>        | 40.347                                       |
| Ca_Desi_SNP313 | [C/T]       | <i>Ca_Desi_LG01</i>        | 40.403                                       |
| Ca_Desi_SNP314 | [A/G]       | <i>Ca_Desi_LG01</i>        | 40.431                                       |
| Ca_Desi_SNP315 | [T/C]       | <i>Ca_Desi_LG01</i>        | 40.558                                       |
| Ca_Desi_SNP316 | [A/G]       | <i>Ca_Desi_LG01</i>        | 40.604                                       |
| Ca_Desi_SNP317 | [T/C]       | <i>Ca_Desi_LG01</i>        | 41.006                                       |
| Ca_Desi_SNP318 | [T/C]       | <i>Ca_Desi_LG01</i>        | 41.013                                       |
| Ca_Desi_SNP319 | [C/A]       | <i>Ca_Desi_LG01</i>        | 41.032                                       |
| Ca_Desi_SNP320 | [T/C]       | <i>Ca_Desi_LG01</i>        | 41.144                                       |
| Ca_Desi_SNP321 | [T/C]       | <i>Ca_Desi_LG01</i>        | 41.149                                       |
| Ca_Desi_SNP322 | [T/G]       | <i>Ca_Desi_LG01</i>        | 41.224                                       |
| Ca_Desi_SNP323 | [T/G]       | <i>Ca_Desi_LG01</i>        | 41.255                                       |
| Ca_Desi_SNP324 | [G/A]       | <i>Ca_Desi_LG01</i>        | 41.310                                       |
| Ca_Desi_SNP325 | [A/G]       | <i>Ca_Desi_LG01</i>        | 41.414                                       |
| Ca_Desi_SNP326 | [T/C]       | <i>Ca_Desi_LG01</i>        | 41.489                                       |
| Ca_Desi_SNP327 | [G/A]       | <i>Ca_Desi_LG01</i>        | 41.490                                       |
| Ca_Desi_SNP328 | [A/G]       | <i>Ca_Desi_LG01</i>        | 41.561                                       |
| Ca_Desi_SNP329 | [G/A]       | <i>Ca_Desi_LG01</i>        | 41.598                                       |
| Ca_Desi_SNP330 | [C/T]       | <i>Ca_Desi_LG01</i>        | 41.721                                       |
| Ca_Desi_SNP331 | [T/C]       | <i>Ca_Desi_LG01</i>        | 41.819                                       |
| Ca_Desi_SNP332 | [T/C]       | <i>Ca_Desi_LG01</i>        | 41.909                                       |
| Ca_Desi_SNP333 | [T/C]       | <i>Ca_Desi_LG01</i>        | 42.172                                       |



| <b>SNP IDs</b> | <b>SNPs</b> | <b>Linkage Group (LGs)</b> | <b>Genetic positions (cM) of mapped SNPs</b> |
|----------------|-------------|----------------------------|----------------------------------------------|
| Ca_Desi_SNP334 | [A/T]       | <i>Ca_Desi_LG01</i>        | 42.374                                       |
| Ca_Desi_SNP335 | [G/A]       | <i>Ca_Desi_LG01</i>        | 42.400                                       |
| Ca_Desi_SNP336 | [T/C]       | <i>Ca_Desi_LG01</i>        | 42.430                                       |
| Ca_Desi_SNP337 | [C/T]       | <i>Ca_Desi_LG01</i>        | 42.664                                       |
| Ca_Desi_SNP338 | [A/C]       | <i>Ca_Desi_LG01</i>        | 42.667                                       |
| Ca_Desi_SNP339 | [C/T]       | <i>Ca_Desi_LG01</i>        | 42.830                                       |
| Ca_Desi_SNP340 | [C/T]       | <i>Ca_Desi_LG01</i>        | 42.927                                       |
| Ca_Desi_SNP341 | [G/T]       | <i>Ca_Desi_LG01</i>        | 42.947                                       |
| Ca_Desi_SNP342 | [A/G]       | <i>Ca_Desi_LG01</i>        | 42.989                                       |
| Ca_Desi_SNP343 | [T/G]       | <i>Ca_Desi_LG01</i>        | 43.057                                       |
| Ca_Desi_SNP344 | [T/C]       | <i>Ca_Desi_LG01</i>        | 43.146                                       |
| Ca_Desi_SNP345 | [A/G]       | <i>Ca_Desi_LG01</i>        | 43.261                                       |
| Ca_Desi_SNP346 | [A/G]       | <i>Ca_Desi_LG01</i>        | 43.282                                       |
| Ca_Desi_SNP347 | [C/A]       | <i>Ca_Desi_LG01</i>        | 43.445                                       |
| Ca_Desi_SNP348 | [A/G]       | <i>Ca_Desi_LG01</i>        | 43.467                                       |
| Ca_Desi_SNP349 | [A/T]       | <i>Ca_Desi_LG01</i>        | 43.745                                       |
| Ca_Desi_SNP350 | [G/T]       | <i>Ca_Desi_LG01</i>        | 43.968                                       |
| Ca_Desi_SNP351 | [T/G]       | <i>Ca_Desi_LG01</i>        | 44.063                                       |
| Ca_Desi_SNP352 | [A/G]       | <i>Ca_Desi_LG01</i>        | 44.121                                       |
| Ca_Desi_SNP353 | [T/C]       | <i>Ca_Desi_LG01</i>        | 44.159                                       |
| Ca_Desi_SNP354 | [C/T]       | <i>Ca_Desi_LG01</i>        | 44.308                                       |
| Ca_Desi_SNP355 | [T/C]       | <i>Ca_Desi_LG01</i>        | 44.325                                       |
| Ca_Desi_SNP356 | [A/C]       | <i>Ca_Desi_LG01</i>        | 44.327                                       |
| Ca_Desi_SNP357 | [A/G]       | <i>Ca_Desi_LG01</i>        | 44.362                                       |
| Ca_Desi_SNP358 | [A/C]       | <i>Ca_Desi_LG01</i>        | 44.480                                       |
| Ca_Desi_SNP359 | [A/G]       | <i>Ca_Desi_LG01</i>        | 44.588                                       |
| Ca_Desi_SNP360 | [C/T]       | <i>Ca_Desi_LG01</i>        | 44.844                                       |
| Ca_Desi_SNP361 | [A/G]       | <i>Ca_Desi_LG01</i>        | 44.856                                       |
| Ca_Desi_SNP362 | [G/A]       | <i>Ca_Desi_LG01</i>        | 44.873                                       |
| Ca_Desi_SNP363 | [T/C]       | <i>Ca_Desi_LG01</i>        | 45.043                                       |
| Ca_Desi_SNP364 | [C/A]       | <i>Ca_Desi_LG01</i>        | 45.048                                       |
| Ca_Desi_SNP365 | [T/A]       | <i>Ca_Desi_LG01</i>        | 45.079                                       |
| Ca_Desi_SNP366 | [C/T]       | <i>Ca_Desi_LG01</i>        | 45.210                                       |
| Ca_Desi_SNP367 | [A/G]       | <i>Ca_Desi_LG01</i>        | 45.225                                       |
| Ca_Desi_SNP368 | [G/A]       | <i>Ca_Desi_LG01</i>        | 45.447                                       |
| Ca_Desi_SNP369 | [G/C]       | <i>Ca_Desi_LG01</i>        | 45.488                                       |
| Ca_Desi_SNP370 | [A/G]       | <i>Ca_Desi_LG01</i>        | 45.539                                       |
| Ca_Desi_SNP371 | [A/C]       | <i>Ca_Desi_LG01</i>        | 45.656                                       |
| Ca_Desi_SNP372 | [C/T]       | <i>Ca_Desi_LG01</i>        | 45.723                                       |
| Ca_Desi_SNP373 | [C/T]       | <i>Ca_Desi_LG01</i>        | 45.726                                       |
| Ca_Desi_SNP374 | [A/C]       | <i>Ca_Desi_LG01</i>        | 45.748                                       |
| Ca_Desi_SNP375 | [T/G]       | <i>Ca_Desi_LG01</i>        | 45.765                                       |
| Ca_Desi_SNP376 | [T/C]       | <i>Ca_Desi_LG01</i>        | 45.800                                       |
| Ca_Desi_SNP377 | [C/T]       | <i>Ca_Desi_LG01</i>        | 45.974                                       |
| Ca_Desi_SNP378 | [G/A]       | <i>Ca_Desi_LG01</i>        | 46.133                                       |
| Ca_Desi_SNP379 | [T/G]       | <i>Ca_Desi_LG01</i>        | 46.235                                       |
| Ca_Desi_SNP380 | [G/A]       | <i>Ca_Desi_LG01</i>        | 46.295                                       |
| Ca_Desi_SNP381 | [A/G]       | <i>Ca_Desi_LG01</i>        | 46.497                                       |

| <b>SNP IDs</b> | <b>SNPs</b> | <b>Linkage Group (LGs)</b> | <b>Genetic positions (cM) of mapped SNPs</b> |
|----------------|-------------|----------------------------|----------------------------------------------|
| Ca_Desi_SNP382 | [A/G]       | <i>Ca_Desi_LG01</i>        | 46.768                                       |
| Ca_Desi_SNP383 | [T/G]       | <i>Ca_Desi_LG01</i>        | 46.770                                       |
| Ca_Desi_SNP384 | [A/C]       | <i>Ca_Desi_LG01</i>        | 46.791                                       |
| Ca_Desi_SNP385 | [C/T]       | <i>Ca_Desi_LG01</i>        | 46.870                                       |
| Ca_Desi_SNP386 | [T/C]       | <i>Ca_Desi_LG01</i>        | 46.942                                       |
| Ca_Desi_SNP387 | [T/C]       | <i>Ca_Desi_LG01</i>        | 47.032                                       |
| Ca_Desi_SNP388 | [T/C]       | <i>Ca_Desi_LG01</i>        | 47.299                                       |
| Ca_Desi_SNP389 | [A/C]       | <i>Ca_Desi_LG01</i>        | 47.453                                       |
| Ca_Desi_SNP390 | [T/C]       | <i>Ca_Desi_LG01</i>        | 47.458                                       |
| Ca_Desi_SNP391 | [A/G]       | <i>Ca_Desi_LG01</i>        | 47.484                                       |
| Ca_Desi_SNP392 | [C/A]       | <i>Ca_Desi_LG01</i>        | 47.566                                       |
| Ca_Desi_SNP393 | [A/C]       | <i>Ca_Desi_LG01</i>        | 47.658                                       |
| Ca_Desi_SNP394 | [T/G]       | <i>Ca_Desi_LG01</i>        | 47.793                                       |
| Ca_Desi_SNP395 | [A/G]       | <i>Ca_Desi_LG01</i>        | 48.130                                       |
| Ca_Desi_SNP396 | [C/T]       | <i>Ca_Desi_LG01</i>        | 48.136                                       |
| Ca_Desi_SNP397 | [A/T]       | <i>Ca_Desi_LG01</i>        | 48.623                                       |
| Ca_Desi_SNP398 | [C/T]       | <i>Ca_Desi_LG01</i>        | 48.663                                       |
| Ca_Desi_SNP399 | [G/A]       | <i>Ca_Desi_LG01</i>        | 48.690                                       |
| Ca_Desi_SNP400 | [T/C]       | <i>Ca_Desi_LG01</i>        | 48.765                                       |
| Ca_Desi_SNP401 | [C/A]       | <i>Ca_Desi_LG01</i>        | 48.793                                       |
| Ca_Desi_SNP402 | [C/A]       | <i>Ca_Desi_LG01</i>        | 48.807                                       |
| Ca_Desi_SNP403 | [A/G]       | <i>Ca_Desi_LG01</i>        | 48.911                                       |
| Ca_Desi_SNP404 | [A/G]       | <i>Ca_Desi_LG01</i>        | 49.194                                       |
| Ca_Desi_SNP405 | [T/C]       | <i>Ca_Desi_LG01</i>        | 49.198                                       |
| Ca_Desi_SNP406 | [T/C]       | <i>Ca_Desi_LG01</i>        | 49.398                                       |
| Ca_Desi_SNP407 | [C/G]       | <i>Ca_Desi_LG01</i>        | 49.411                                       |
| Ca_Desi_SNP408 | [T/G]       | <i>Ca_Desi_LG01</i>        | 49.586                                       |
| Ca_Desi_SNP409 | [T/G]       | <i>Ca_Desi_LG01</i>        | 49.635                                       |
| Ca_Desi_SNP410 | [T/G]       | <i>Ca_Desi_LG01</i>        | 49.730                                       |
| Ca_Desi_SNP411 | [T/A]       | <i>Ca_Desi_LG01</i>        | 49.755                                       |
| Ca_Desi_SNP412 | [G/C]       | <i>Ca_Desi_LG01</i>        | 50.066                                       |
| Ca_Desi_SNP413 | [A/G]       | <i>Ca_Desi_LG01</i>        | 50.267                                       |
| Ca_Desi_SNP414 | [C/A]       | <i>Ca_Desi_LG01</i>        | 50.537                                       |
| Ca_Desi_SNP415 | [T/C]       | <i>Ca_Desi_LG01</i>        | 50.556                                       |
| Ca_Desi_SNP416 | [T/C]       | <i>Ca_Desi_LG01</i>        | 50.565                                       |
| Ca_Desi_SNP417 | [T/C]       | <i>Ca_Desi_LG01</i>        | 50.617                                       |
| Ca_Desi_SNP418 | [A/G]       | <i>Ca_Desi_LG01</i>        | 50.671                                       |
| Ca_Desi_SNP419 | [A/C]       | <i>Ca_Desi_LG01</i>        | 50.686                                       |
| Ca_Desi_SNP420 | [T/C]       | <i>Ca_Desi_LG01</i>        | 50.698                                       |
| Ca_Desi_SNP421 | [C/A]       | <i>Ca_Desi_LG01</i>        | 50.717                                       |
| Ca_Desi_SNP422 | [T/C]       | <i>Ca_Desi_LG01</i>        | 50.746                                       |
| Ca_Desi_SNP423 | [A/T]       | <i>Ca_Desi_LG01</i>        | 50.789                                       |
| Ca_Desi_SNP424 | [A/G]       | <i>Ca_Desi_LG01</i>        | 50.850                                       |
| Ca_Desi_SNP425 | [T/G]       | <i>Ca_Desi_LG01</i>        | 50.949                                       |
| Ca_Desi_SNP426 | [C/T]       | <i>Ca_Desi_LG01</i>        | 50.983                                       |
| Ca_Desi_SNP427 | [C/T]       | <i>Ca_Desi_LG01</i>        | 51.121                                       |
| Ca_Desi_SNP428 | [C/G]       | <i>Ca_Desi_LG01</i>        | 51.170                                       |
| Ca_Desi_SNP429 | [T/A]       | <i>Ca_Desi_LG01</i>        | 51.199                                       |

| <b>SNP IDs</b>  | <b>SNPs</b> | <b>Linkage Group (LGs)</b> | <b>Genetic positions (cM) of mapped SNPs</b> |
|-----------------|-------------|----------------------------|----------------------------------------------|
| Ca_Desig_SNP430 | [G/C]       | Ca_Desig_LG01              | 51.211                                       |
| Ca_Desig_SNP431 | [C/A]       | Ca_Desig_LG01              | 51.251                                       |
| Ca_Desig_SNP432 | [A/G]       | Ca_Desig_LG01              | 51.305                                       |
| Ca_Desig_SNP433 | [T/C]       | Ca_Desig_LG01              | 51.332                                       |
| Ca_Desig_SNP434 | [A/G]       | Ca_Desig_LG01              | 51.343                                       |
| Ca_Desig_SNP435 | [T/G]       | Ca_Desig_LG01              | 51.387                                       |
| Ca_Desig_SNP436 | [T/C]       | Ca_Desig_LG01              | 51.398                                       |
| Ca_Desig_SNP437 | [A/G]       | Ca_Desig_LG01              | 51.512                                       |
| Ca_Desig_SNP438 | [G/T]       | Ca_Desig_LG01              | 51.531                                       |
| Ca_Desig_SNP439 | [A/G]       | Ca_Desig_LG01              | 51.552                                       |
| Ca_Desig_SNP440 | [A/C]       | Ca_Desig_LG01              | 51.653                                       |
| Ca_Desig_SNP441 | [T/A]       | Ca_Desig_LG01              | 51.899                                       |
| Ca_Desig_SNP442 | [T/G]       | Ca_Desig_LG01              | 51.928                                       |
| Ca_Desig_SNP443 | [A/G]       | Ca_Desig_LG01              | 51.995                                       |
| Ca_Desig_SNP444 | [T/A]       | Ca_Desig_LG01              | 52.008                                       |
| Ca_Desig_SNP445 | [A/G]       | Ca_Desig_LG01              | 52.196                                       |
| Ca_Desig_SNP446 | [A/T]       | Ca_Desig_LG01              | 52.210                                       |
| Ca_Desig_SNP447 | [T/C]       | Ca_Desig_LG01              | 52.279                                       |
| Ca_Desig_SNP448 | [A/G]       | Ca_Desig_LG01              | 52.282                                       |
| Ca_Desig_SNP449 | [T/C]       | Ca_Desig_LG01              | 52.290                                       |
| Ca_Desig_SNP450 | [A/G]       | Ca_Desig_LG01              | 52.318                                       |
| Ca_Desig_SNP451 | [G/T]       | Ca_Desig_LG01              | 52.321                                       |
| Ca_Desig_SNP452 | [T/C]       | Ca_Desig_LG01              | 52.377                                       |
| Ca_Desig_SNP453 | [A/G]       | Ca_Desig_LG01              | 52.439                                       |
| Ca_Desig_SNP454 | [G/T]       | Ca_Desig_LG01              | 52.446                                       |
| Ca_Desig_SNP455 | [A/T]       | Ca_Desig_LG01              | 52.460                                       |
| Ca_Desig_SNP456 | [A/G]       | Ca_Desig_LG01              | 52.521                                       |
| Ca_Desig_SNP457 | [C/T]       | Ca_Desig_LG01              | 52.670                                       |
| Ca_Desig_SNP458 | [A/G]       | Ca_Desig_LG01              | 52.730                                       |
| Ca_Desig_SNP459 | [A/C]       | Ca_Desig_LG01              | 52.751                                       |
| Ca_Desig_SNP460 | [A/C]       | Ca_Desig_LG01              | 52.758                                       |
| Ca_Desig_SNP461 | [T/C]       | Ca_Desig_LG01              | 52.803                                       |
| Ca_Desig_SNP462 | [G/A]       | Ca_Desig_LG01              | 52.830                                       |
| Ca_Desig_SNP463 | [A/T]       | Ca_Desig_LG01              | 52.834                                       |
| Ca_Desig_SNP464 | [C/T]       | Ca_Desig_LG01              | 52.959                                       |
| Ca_Desig_SNP465 | [T/G]       | Ca_Desig_LG01              | 53.054                                       |
| Ca_Desig_SNP466 | [G/T]       | Ca_Desig_LG01              | 53.292                                       |
| Ca_Desig_SNP467 | [A/C]       | Ca_Desig_LG01              | 53.407                                       |
| Ca_Desig_SNP468 | [G/T]       | Ca_Desig_LG01              | 53.519                                       |
| Ca_Desig_SNP469 | [T/C]       | Ca_Desig_LG01              | 53.535                                       |
| Ca_Desig_SNP470 | [C/T]       | Ca_Desig_LG01              | 53.579                                       |
| Ca_Desig_SNP471 | [T/G]       | Ca_Desig_LG01              | 53.581                                       |
| Ca_Desig_SNP472 | [G/T]       | Ca_Desig_LG01              | 53.621                                       |
| Ca_Desig_SNP473 | [A/C]       | Ca_Desig_LG01              | 53.728                                       |
| Ca_Desig_SNP474 | [A/G]       | Ca_Desig_LG01              | 53.729                                       |
| Ca_Desig_SNP475 | [G/A]       | Ca_Desig_LG01              | 53.738                                       |
| Ca_Desig_SNP476 | [A/C]       | Ca_Desig_LG01              | 53.739                                       |
| Ca_Desig_SNP477 | [T/G]       | Ca_Desig_LG01              | 54.094                                       |

| <b>SNP IDs</b>  | <b>SNPs</b> | <b>Linkage Group (LGs)</b> | <b>Genetic positions (cM) of mapped SNPs</b> |
|-----------------|-------------|----------------------------|----------------------------------------------|
| Ca_Desig_SNP478 | [T/C]       | <i>Ca_Desig_LG01</i>       | 54.128                                       |
| Ca_Desig_SNP479 | [T/C]       | <i>Ca_Desig_LG01</i>       | 54.141                                       |
| Ca_Desig_SNP480 | [C/G]       | <i>Ca_Desig_LG01</i>       | 54.145                                       |
| Ca_Desig_SNP481 | [T/C]       | <i>Ca_Desig_LG01</i>       | 54.172                                       |
| Ca_Desig_SNP482 | [G/T]       | <i>Ca_Desig_LG01</i>       | 54.344                                       |
| Ca_Desig_SNP483 | [T/C]       | <i>Ca_Desig_LG01</i>       | 54.383                                       |
| Ca_Desig_SNP484 | [C/T]       | <i>Ca_Desig_LG01</i>       | 54.441                                       |
| Ca_Desig_SNP485 | [A/G]       | <i>Ca_Desig_LG01</i>       | 54.508                                       |
| Ca_Desig_SNP486 | [A/C]       | <i>Ca_Desig_LG01</i>       | 54.514                                       |
| Ca_Desig_SNP487 | [T/C]       | <i>Ca_Desig_LG01</i>       | 54.536                                       |
| Ca_Desig_SNP488 | [T/C]       | <i>Ca_Desig_LG01</i>       | 54.597                                       |
| Ca_Desig_SNP489 | [G/A]       | <i>Ca_Desig_LG01</i>       | 54.713                                       |
| Ca_Desig_SNP490 | [A/G]       | <i>Ca_Desig_LG01</i>       | 54.869                                       |
| Ca_Desig_SNP491 | [T/C]       | <i>Ca_Desig_LG01</i>       | 54.883                                       |
| Ca_Desig_SNP492 | [G/C]       | <i>Ca_Desig_LG01</i>       | 55.000                                       |
| Ca_Desig_SNP493 | [T/A]       | <i>Ca_Desig_LG01</i>       | 55.012                                       |
| Ca_Desig_SNP494 | [A/G]       | <i>Ca_Desig_LG01</i>       | 55.109                                       |
| Ca_Desig_SNP495 | [A/C]       | <i>Ca_Desig_LG01</i>       | 55.115                                       |
| Ca_Desig_SNP496 | [A/G]       | <i>Ca_Desig_LG01</i>       | 55.118                                       |
| Ca_Desig_SNP497 | [G/A]       | <i>Ca_Desig_LG01</i>       | 55.160                                       |
| Ca_Desig_SNP498 | [T/C]       | <i>Ca_Desig_LG01</i>       | 55.161                                       |
| Ca_Desig_SNP499 | [A/T]       | <i>Ca_Desig_LG01</i>       | 55.224                                       |
| Ca_Desig_SNP500 | [A/G]       | <i>Ca_Desig_LG01</i>       | 55.245                                       |
| Ca_Desig_SNP501 | [A/C]       | <i>Ca_Desig_LG01</i>       | 55.295                                       |
| Ca_Desig_SNP502 | [C/T]       | <i>Ca_Desig_LG01</i>       | 55.318                                       |
| Ca_Desig_SNP503 | [T/C]       | <i>Ca_Desig_LG01</i>       | 55.349                                       |
| Ca_Desig_SNP504 | [A/G]       | <i>Ca_Desig_LG01</i>       | 55.433                                       |
| Ca_Desig_SNP505 | [A/G]       | <i>Ca_Desig_LG01</i>       | 55.442                                       |
| Ca_Desig_SNP506 | [A/G]       | <i>Ca_Desig_LG01</i>       | 55.456                                       |
| Ca_Desig_SNP507 | [T/C]       | <i>Ca_Desig_LG01</i>       | 55.475                                       |
| Ca_Desig_SNP508 | [T/C]       | <i>Ca_Desig_LG01</i>       | 55.538                                       |
| Ca_Desig_SNP509 | [T/A]       | <i>Ca_Desig_LG01</i>       | 55.724                                       |
| Ca_Desig_SNP510 | [C/A]       | <i>Ca_Desig_LG01</i>       | 55.732                                       |
| Ca_Desig_SNP511 | [T/C]       | <i>Ca_Desig_LG01</i>       | 55.757                                       |
| Ca_Desig_SNP512 | [T/C]       | <i>Ca_Desig_LG01</i>       | 56.022                                       |
| Ca_Desig_SNP513 | [C/T]       | <i>Ca_Desig_LG01</i>       | 56.043                                       |
| Ca_Desig_SNP514 | [A/G]       | <i>Ca_Desig_LG01</i>       | 56.130                                       |
| Ca_Desig_SNP515 | [A/G]       | <i>Ca_Desig_LG01</i>       | 56.158                                       |
| Ca_Desig_SNP516 | [A/C]       | <i>Ca_Desig_LG01</i>       | 56.301                                       |
| Ca_Desig_SNP517 | [A/C]       | <i>Ca_Desig_LG01</i>       | 56.350                                       |
| Ca_Desig_SNP518 | [A/T]       | <i>Ca_Desig_LG01</i>       | 56.514                                       |
| Ca_Desig_SNP519 | [T/C]       | <i>Ca_Desig_LG01</i>       | 56.572                                       |
| Ca_Desig_SNP520 | [T/G]       | <i>Ca_Desig_LG01</i>       | 56.606                                       |
| Ca_Desig_SNP521 | [A/G]       | <i>Ca_Desig_LG01</i>       | 56.661                                       |
| Ca_Desig_SNP522 | [A/T]       | <i>Ca_Desig_LG01</i>       | 56.690                                       |
| Ca_Desig_SNP523 | [T/C]       | <i>Ca_Desig_LG01</i>       | 56.760                                       |
| Ca_Desig_SNP524 | [A/T]       | <i>Ca_Desig_LG01</i>       | 56.786                                       |
| Ca_Desig_SNP525 | [A/G]       | <i>Ca_Desig_LG01</i>       | 56.984                                       |

| <b>SNP IDs</b> | <b>SNPs</b> | <b>Linkage Group (LGs)</b> | <b>Genetic positions (cM) of mapped SNPs</b> |
|----------------|-------------|----------------------------|----------------------------------------------|
| Ca_Desi_SNP526 | [A/G]       | <i>Ca_Desi_LG01</i>        | 57.121                                       |
| Ca_Desi_SNP527 | [T/C]       | <i>Ca_Desi_LG01</i>        | 57.172                                       |
| Ca_Desi_SNP528 | [T/C]       | <i>Ca_Desi_LG01</i>        | 57.223                                       |
| Ca_Desi_SNP529 | [T/C]       | <i>Ca_Desi_LG01</i>        | 57.294                                       |
| Ca_Desi_SNP530 | [G/C]       | <i>Ca_Desi_LG01</i>        | 57.334                                       |
| Ca_Desi_SNP531 | [A/G]       | <i>Ca_Desi_LG01</i>        | 57.540                                       |
| Ca_Desi_SNP532 | [T/C]       | <i>Ca_Desi_LG01</i>        | 57.632                                       |
| Ca_Desi_SNP533 | [A/G]       | <i>Ca_Desi_LG01</i>        | 57.688                                       |
| Ca_Desi_SNP534 | [A/C]       | <i>Ca_Desi_LG01</i>        | 57.692                                       |
| Ca_Desi_SNP535 | [T/G]       | <i>Ca_Desi_LG01</i>        | 57.700                                       |
| Ca_Desi_SNP536 | [G/A]       | <i>Ca_Desi_LG01</i>        | 57.720                                       |
| Ca_Desi_SNP537 | [A/C]       | <i>Ca_Desi_LG01</i>        | 57.906                                       |
| Ca_Desi_SNP538 | [A/G]       | <i>Ca_Desi_LG01</i>        | 57.927                                       |
| Ca_Desi_SNP539 | [T/G]       | <i>Ca_Desi_LG01</i>        | 58.070                                       |
| Ca_Desi_SNP540 | [G/T]       | <i>Ca_Desi_LG01</i>        | 58.093                                       |
| Ca_Desi_SNP541 | [T/G]       | <i>Ca_Desi_LG01</i>        | 58.304                                       |
| Ca_Desi_SNP542 | [A/C]       | <i>Ca_Desi_LG01</i>        | 58.358                                       |
| Ca_Desi_SNP543 | [T/A]       | <i>Ca_Desi_LG01</i>        | 58.390                                       |
| Ca_Desi_SNP544 | [A/C]       | <i>Ca_Desi_LG01</i>        | 58.530                                       |
| Ca_Desi_SNP545 | [T/C]       | <i>Ca_Desi_LG01</i>        | 58.758                                       |
| Ca_Desi_SNP546 | [T/G]       | <i>Ca_Desi_LG01</i>        | 58.790                                       |
| Ca_Desi_SNP547 | [T/C]       | <i>Ca_Desi_LG01</i>        | 58.843                                       |
| Ca_Desi_SNP548 | [T/C]       | <i>Ca_Desi_LG01</i>        | 58.876                                       |
| Ca_Desi_SNP549 | [T/C]       | <i>Ca_Desi_LG01</i>        | 58.928                                       |
| Ca_Desi_SNP550 | [G/A]       | <i>Ca_Desi_LG01</i>        | 58.934                                       |
| Ca_Desi_SNP551 | [T/G]       | <i>Ca_Desi_LG01</i>        | 58.947                                       |
| Ca_Desi_SNP552 | [C/A]       | <i>Ca_Desi_LG01</i>        | 58.974                                       |
| Ca_Desi_SNP553 | [T/G]       | <i>Ca_Desi_LG01</i>        | 58.981                                       |
| Ca_Desi_SNP554 | [A/T]       | <i>Ca_Desi_LG01</i>        | 59.042                                       |
| Ca_Desi_SNP555 | [G/A]       | <i>Ca_Desi_LG01</i>        | 59.057                                       |
| Ca_Desi_SNP556 | [T/C]       | <i>Ca_Desi_LG01</i>        | 59.075                                       |
| Ca_Desi_SNP557 | [G/A]       | <i>Ca_Desi_LG01</i>        | 59.131                                       |
| Ca_Desi_SNP558 | [A/G]       | <i>Ca_Desi_LG01</i>        | 59.154                                       |
| Ca_Desi_SNP559 | [A/G]       | <i>Ca_Desi_LG01</i>        | 59.239                                       |
| Ca_Desi_SNP560 | [A/T]       | <i>Ca_Desi_LG01</i>        | 59.271                                       |
| Ca_Desi_SNP561 | [A/C]       | <i>Ca_Desi_LG01</i>        | 59.306                                       |
| Ca_Desi_SNP562 | [T/G]       | <i>Ca_Desi_LG01</i>        | 59.429                                       |
| Ca_Desi_SNP563 | [A/C]       | <i>Ca_Desi_LG01</i>        | 59.578                                       |
| Ca_Desi_SNP564 | [T/C]       | <i>Ca_Desi_LG01</i>        | 59.584                                       |
| Ca_Desi_SNP565 | [T/C]       | <i>Ca_Desi_LG01</i>        | 59.590                                       |
| Ca_Desi_SNP566 | [C/A]       | <i>Ca_Desi_LG01</i>        | 59.671                                       |
| Ca_Desi_SNP567 | [C/T]       | <i>Ca_Desi_LG01</i>        | 59.822                                       |
| Ca_Desi_SNP568 | [G/C]       | <i>Ca_Desi_LG01</i>        | 59.845                                       |
| Ca_Desi_SNP569 | [G/A]       | <i>Ca_Desi_LG01</i>        | 59.869                                       |
| Ca_Desi_SNP570 | [C/G]       | <i>Ca_Desi_LG01</i>        | 60.108                                       |
| Ca_Desi_SNP571 | [A/G]       | <i>Ca_Desi_LG01</i>        | 60.189                                       |
| Ca_Desi_SNP572 | [A/G]       | <i>Ca_Desi_LG01</i>        | 60.401                                       |
| Ca_Desi_SNP573 | [A/G]       | <i>Ca_Desi_LG01</i>        | 60.446                                       |

| SNP IDs        | SNPs  | Linkage Group (LGs) | Genetic positions (cM) of mapped SNPs |
|----------------|-------|---------------------|---------------------------------------|
| Ca_Desi_SNP574 | [A/G] | <i>Ca_Desi_LG01</i> | 60.495                                |
| Ca_Desi_SNP575 | [A/G] | <i>Ca_Desi_LG01</i> | 60.548                                |
| Ca_Desi_SNP576 | [C/T] | <i>Ca_Desi_LG01</i> | 60.616                                |
| Ca_Desi_SNP577 | [T/C] | <i>Ca_Desi_LG01</i> | 60.619                                |
| Ca_Desi_SNP578 | [G/T] | <i>Ca_Desi_LG01</i> | 60.673                                |
| Ca_Desi_SNP579 | [G/A] | <i>Ca_Desi_LG01</i> | 60.722                                |
| Ca_Desi_SNP580 | [T/C] | <i>Ca_Desi_LG01</i> | 60.775                                |
| Ca_Desi_SNP581 | [A/C] | <i>Ca_Desi_LG01</i> | 60.915                                |
| Ca_Desi_SNP582 | [T/C] | <i>Ca_Desi_LG01</i> | 60.938                                |
| Ca_Desi_SNP583 | [A/G] | <i>Ca_Desi_LG01</i> | 61.090                                |
| Ca_Desi_SNP584 | [A/C] | <i>Ca_Desi_LG01</i> | 61.091                                |
| Ca_Desi_SNP585 | [A/G] | <i>Ca_Desi_LG01</i> | 61.093                                |
| Ca_Desi_SNP586 | [G/A] | <i>Ca_Desi_LG01</i> | 61.159                                |
| Ca_Desi_SNP587 | [T/A] | <i>Ca_Desi_LG01</i> | 61.182                                |
| Ca_Desi_SNP588 | [A/G] | <i>Ca_Desi_LG01</i> | 61.355                                |
| Ca_Desi_SNP589 | [T/C] | <i>Ca_Desi_LG01</i> | 61.361                                |
| Ca_Desi_SNP590 | [T/C] | <i>Ca_Desi_LG01</i> | 61.417                                |
| Ca_Desi_SNP591 | [T/C] | <i>Ca_Desi_LG01</i> | 61.419                                |
| Ca_Desi_SNP592 | [T/G] | <i>Ca_Desi_LG01</i> | 61.466                                |
| Ca_Desi_SNP593 | [A/C] | <i>Ca_Desi_LG01</i> | 61.615                                |
| Ca_Desi_SNP594 | [C/T] | <i>Ca_Desi_LG01</i> | 61.623                                |
| Ca_Desi_SNP595 | [T/G] | <i>Ca_Desi_LG01</i> | 61.738                                |
| Ca_Desi_SNP596 | [T/C] | <i>Ca_Desi_LG01</i> | 61.997                                |
| Ca_Desi_SNP597 | [T/C] | <i>Ca_Desi_LG01</i> | 62.083                                |
| Ca_Desi_SNP598 | [A/G] | <i>Ca_Desi_LG01</i> | 62.174                                |
| Ca_Desi_SNP599 | [A/G] | <i>Ca_Desi_LG01</i> | 62.397                                |
| Ca_Desi_SNP600 | [A/G] | <i>Ca_Desi_LG01</i> | 62.456                                |
| Ca_Desi_SNP601 | [G/A] | <i>Ca_Desi_LG01</i> | 62.570                                |
| Ca_Desi_SNP602 | [T/C] | <i>Ca_Desi_LG01</i> | 62.707                                |
| Ca_Desi_SNP603 | [T/C] | <i>Ca_Desi_LG01</i> | 62.708                                |
| Ca_Desi_SNP604 | [T/G] | <i>Ca_Desi_LG01</i> | 62.819                                |
| Ca_Desi_SNP605 | [A/T] | <i>Ca_Desi_LG01</i> | 62.823                                |
| Ca_Desi_SNP606 | [A/G] | <i>Ca_Desi_LG01</i> | 62.887                                |
| Ca_Desi_SNP607 | [T/A] | <i>Ca_Desi_LG01</i> | 63.022                                |
| Ca_Desi_SNP608 | [C/T] | <i>Ca_Desi_LG01</i> | 63.083                                |
| Ca_Desi_SNP609 | [A/G] | <i>Ca_Desi_LG01</i> | 63.198                                |
| Ca_Desi_SNP610 | [A/G] | <i>Ca_Desi_LG01</i> | 63.255                                |
| Ca_Desi_SNP611 | [T/C] | <i>Ca_Desi_LG01</i> | 63.312                                |
| Ca_Desi_SNP612 | [T/G] | <i>Ca_Desi_LG01</i> | 63.341                                |
| Ca_Desi_SNP613 | [A/G] | <i>Ca_Desi_LG01</i> | 63.381                                |
| Ca_Desi_SNP614 | [T/C] | <i>Ca_Desi_LG01</i> | 63.469                                |
| Ca_Desi_SNP615 | [A/G] | <i>Ca_Desi_LG01</i> | 63.538                                |
| Ca_Desi_SNP616 | [T/G] | <i>Ca_Desi_LG01</i> | 63.546                                |
| Ca_Desi_SNP617 | [T/G] | <i>Ca_Desi_LG01</i> | 63.583                                |
| Ca_Desi_SNP618 | [A/G] | <i>Ca_Desi_LG01</i> | 63.722                                |
| Ca_Desi_SNP619 | [G/A] | <i>Ca_Desi_LG01</i> | 63.920                                |
| Ca_Desi_SNP620 | [A/G] | <i>Ca_Desi_LG01</i> | 63.980                                |
| Ca_Desi_SNP621 | [G/T] | <i>Ca_Desi_LG01</i> | 64.000                                |

| <b>SNP IDs</b> | <b>SNPs</b> | <b>Linkage Group (LGs)</b> | <b>Genetic positions (cM) of mapped SNPs</b> |
|----------------|-------------|----------------------------|----------------------------------------------|
| Ca_Desi_SNP622 | [C/T]       | <i>Ca_Desi_LG01</i>        | 64.053                                       |
| Ca_Desi_SNP623 | [A/C]       | <i>Ca_Desi_LG01</i>        | 64.064                                       |
| Ca_Desi_SNP624 | [A/C]       | <i>Ca_Desi_LG01</i>        | 64.169                                       |
| Ca_Desi_SNP625 | [T/C]       | <i>Ca_Desi_LG01</i>        | 64.180                                       |
| Ca_Desi_SNP626 | [A/G]       | <i>Ca_Desi_LG01</i>        | 64.183                                       |
| Ca_Desi_SNP627 | [T/G]       | <i>Ca_Desi_LG01</i>        | 64.237                                       |
| Ca_Desi_SNP628 | [A/G]       | <i>Ca_Desi_LG01</i>        | 64.307                                       |
| Ca_Desi_SNP629 | [A/G]       | <i>Ca_Desi_LG01</i>        | 64.359                                       |
| Ca_Desi_SNP630 | [A/C]       | <i>Ca_Desi_LG01</i>        | 64.397                                       |
| Ca_Desi_SNP631 | [G/A]       | <i>Ca_Desi_LG01</i>        | 64.423                                       |
| Ca_Desi_SNP632 | [T/G]       | <i>Ca_Desi_LG01</i>        | 64.462                                       |
| Ca_Desi_SNP633 | [A/G]       | <i>Ca_Desi_LG01</i>        | 64.494                                       |
| Ca_Desi_SNP634 | [C/T]       | <i>Ca_Desi_LG01</i>        | 64.545                                       |
| Ca_Desi_SNP635 | [C/A]       | <i>Ca_Desi_LG01</i>        | 64.572                                       |
| Ca_Desi_SNP636 | [G/A]       | <i>Ca_Desi_LG01</i>        | 64.655                                       |
| Ca_Desi_SNP637 | [T/G]       | <i>Ca_Desi_LG01</i>        | 64.707                                       |
| Ca_Desi_SNP638 | [G/A]       | <i>Ca_Desi_LG01</i>        | 64.817                                       |
| Ca_Desi_SNP639 | [A/C]       | <i>Ca_Desi_LG01</i>        | 64.977                                       |
| Ca_Desi_SNP640 | [A/G]       | <i>Ca_Desi_LG01</i>        | 65.111                                       |
| Ca_Desi_SNP641 | [A/G]       | <i>Ca_Desi_LG01</i>        | 65.404                                       |
| Ca_Desi_SNP642 | [A/C]       | <i>Ca_Desi_LG01</i>        | 65.547                                       |
| Ca_Desi_SNP643 | [C/G]       | <i>Ca_Desi_LG01</i>        | 65.622                                       |
| Ca_Desi_SNP644 | [A/G]       | <i>Ca_Desi_LG01</i>        | 65.630                                       |
| Ca_Desi_SNP645 | [T/C]       | <i>Ca_Desi_LG01</i>        | 65.674                                       |
| Ca_Desi_SNP646 | [T/C]       | <i>Ca_Desi_LG01</i>        | 65.773                                       |
| Ca_Desi_SNP647 | [C/A]       | <i>Ca_Desi_LG01</i>        | 65.941                                       |
| Ca_Desi_SNP648 | [T/C]       | <i>Ca_Desi_LG01</i>        | 66.014                                       |
| Ca_Desi_SNP649 | [A/C]       | <i>Ca_Desi_LG01</i>        | 66.061                                       |
| Ca_Desi_SNP650 | [T/G]       | <i>Ca_Desi_LG01</i>        | 66.206                                       |
| Ca_Desi_SNP651 | [A/G]       | <i>Ca_Desi_LG01</i>        | 66.299                                       |
| Ca_Desi_SNP652 | [G/A]       | <i>Ca_Desi_LG01</i>        | 66.744                                       |
| Ca_Desi_SNP653 | [A/G]       | <i>Ca_Desi_LG01</i>        | 66.813                                       |
| Ca_Desi_SNP654 | [A/C]       | <i>Ca_Desi_LG01</i>        | 66.876                                       |
| Ca_Desi_SNP655 | [T/A]       | <i>Ca_Desi_LG01</i>        | 67.106                                       |
| Ca_Desi_SNP656 | [A/C]       | <i>Ca_Desi_LG01</i>        | 67.134                                       |
| Ca_Desi_SNP657 | [T/C]       | <i>Ca_Desi_LG01</i>        | 67.220                                       |
| Ca_Desi_SNP658 | [T/C]       | <i>Ca_Desi_LG01</i>        | 67.262                                       |
| Ca_Desi_SNP659 | [T/G]       | <i>Ca_Desi_LG01</i>        | 67.383                                       |
| Ca_Desi_SNP660 | [T/A]       | <i>Ca_Desi_LG01</i>        | 67.535                                       |
| Ca_Desi_SNP661 | [T/C]       | <i>Ca_Desi_LG01</i>        | 67.922                                       |
| Ca_Desi_SNP662 | [G/C]       | <i>Ca_Desi_LG01</i>        | 68.187                                       |
| Ca_Desi_SNP663 | [A/C]       | <i>Ca_Desi_LG01</i>        | 68.264                                       |
| Ca_Desi_SNP664 | [A/G]       | <i>Ca_Desi_LG01</i>        | 68.342                                       |
| Ca_Desi_SNP665 | [T/G]       | <i>Ca_Desi_LG01</i>        | 68.556                                       |
| Ca_Desi_SNP666 | [G/A]       | <i>Ca_Desi_LG01</i>        | 68.593                                       |
| Ca_Desi_SNP667 | [T/C]       | <i>Ca_Desi_LG01</i>        | 68.602                                       |
| Ca_Desi_SNP668 | [C/T]       | <i>Ca_Desi_LG01</i>        | 68.874                                       |
| Ca_Desi_SNP669 | [T/C]       | <i>Ca_Desi_LG01</i>        | 68.933                                       |

| <b>SNP IDs</b>  | <b>SNPs</b> | <b>Linkage Group (LGs)</b> | <b>Genetic positions (cM) of mapped SNPs</b> |
|-----------------|-------------|----------------------------|----------------------------------------------|
| Ca_Desig_SNP670 | [C/T]       | Ca_Desig_LG01              | 69.055                                       |
| Ca_Desig_SNP671 | [A/G]       | Ca_Desig_LG01              | 69.095                                       |
| Ca_Desig_SNP672 | [A/G]       | Ca_Desig_LG01              | 69.194                                       |
| Ca_Desig_SNP673 | [T/C]       | Ca_Desig_LG01              | 69.204                                       |
| Ca_Desig_SNP674 | [T/C]       | Ca_Desig_LG01              | 69.303                                       |
| Ca_Desig_SNP675 | [T/C]       | Ca_Desig_LG01              | 69.389                                       |
| Ca_Desig_SNP676 | [A/G]       | Ca_Desig_LG01              | 69.453                                       |
| Ca_Desig_SNP677 | [A/G]       | Ca_Desig_LG01              | 69.737                                       |
| Ca_Desig_SNP678 | [A/G]       | Ca_Desig_LG01              | 69.757                                       |
| Ca_Desig_SNP679 | [A/T]       | Ca_Desig_LG01              | 69.876                                       |
| Ca_Desig_SNP680 | [C/A]       | Ca_Desig_LG01              | 70.529                                       |
| Ca_Desig_SNP681 | [A/T]       | Ca_Desig_LG01              | 70.639                                       |
| Ca_Desig_SNP682 | [A/G]       | Ca_Desig_LG01              | 71.370                                       |
| Ca_Desig_SNP683 | [G/A]       | Ca_Desig_LG01              | 71.452                                       |
| Ca_Desig_SNP684 | [T/C]       | Ca_Desig_LG01              | 71.548                                       |
| Ca_Desig_SNP685 | [G/A]       | Ca_Desig_LG01              | 71.700                                       |
| Ca_Desig_SNP686 | [A/T]       | Ca_Desig_LG01              | 71.827                                       |
| Ca_Desig_SNP687 | [C/A]       | Ca_Desig_LG01              | 71.914                                       |
| Ca_Desig_SNP688 | [A/G]       | Ca_Desig_LG01              | 71.993                                       |
| Ca_Desig_SNP689 | [T/C]       | Ca_Desig_LG01              | 72.305                                       |
| Ca_Desig_SNP690 | [T/G]       | Ca_Desig_LG01              | 72.454                                       |
| Ca_Desig_SNP691 | [T/G]       | Ca_Desig_LG01              | 72.506                                       |
| Ca_Desig_SNP692 | [A/C]       | Ca_Desig_LG01              | 72.543                                       |
| Ca_Desig_SNP693 | [A/C]       | Ca_Desig_LG01              | 72.636                                       |
| Ca_Desig_SNP694 | [T/G]       | Ca_Desig_LG01              | 72.752                                       |
| Ca_Desig_SNP695 | [A/C]       | Ca_Desig_LG01              | 72.769                                       |
| Ca_Desig_SNP696 | [T/C]       | Ca_Desig_LG01              | 72.878                                       |
| Ca_Desig_SNP697 | [C/A]       | Ca_Desig_LG01              | 73.001                                       |
| Ca_Desig_SNP698 | [T/G]       | Ca_Desig_LG01              | 73.166                                       |
| Ca_Desig_SNP699 | [A/G]       | Ca_Desig_LG01              | 73.737                                       |
| Ca_Desig_SNP700 | [A/G]       | Ca_Desig_LG01              | 73.820                                       |
| Ca_Desig_SNP701 | [C/T]       | Ca_Desig_LG01              | 73.822                                       |
| Ca_Desig_SNP702 | [T/C]       | Ca_Desig_LG01              | 73.978                                       |
| Ca_Desig_SNP703 | [C/T]       | Ca_Desig_LG01              | 73.997                                       |
| Ca_Desig_SNP704 | [A/C]       | Ca_Desig_LG01              | 74.092                                       |
| Ca_Desig_SNP705 | [A/C]       | Ca_Desig_LG01              | 74.200                                       |
| Ca_Desig_SNP706 | [T/C]       | Ca_Desig_LG01              | 75.068                                       |
| Ca_Desig_SNP707 | [A/G]       | Ca_Desig_LG01              | 75.258                                       |
| Ca_Desig_SNP708 | [A/G]       | Ca_Desig_LG01              | 75.381                                       |
| Ca_Desig_SNP709 | [T/A]       | Ca_Desig_LG01              | 75.405                                       |
| Ca_Desig_SNP710 | [G/C]       | Ca_Desig_LG01              | 75.652                                       |
| Ca_Desig_SNP711 | [C/T]       | Ca_Desig_LG01              | 75.838                                       |
| Ca_Desig_SNP712 | [A/T]       | Ca_Desig_LG01              | 75.972                                       |
| Ca_Desig_SNP713 | [T/C]       | Ca_Desig_LG01              | 76.187                                       |
| Ca_Desig_SNP714 | [C/A]       | Ca_Desig_LG01              | 76.275                                       |
| Ca_Desig_SNP715 | [T/G]       | Ca_Desig_LG01              | 76.317                                       |
| Ca_Desig_SNP716 | [T/G]       | Ca_Desig_LG01              | 76.792                                       |
| Ca_Desig_SNP717 | [T/C]       | Ca_Desig_LG01              | 77.331                                       |



| SNP IDs         | SNPs  | Linkage Group (LGs) | Genetic positions (cM) of mapped SNPs |
|-----------------|-------|---------------------|---------------------------------------|
| Ca_Desig_SNP718 | [A/C] | Ca_Desig_LG01       | 77.653                                |
| Ca_Desig_SNP719 | [A/G] | Ca_Desig_LG01       | 78.635                                |
| Ca_Desig_SNP720 | [A/G] | Ca_Desig_LG01       | 78.771                                |
| Ca_Desig_SNP721 | [T/G] | Ca_Desig_LG01       | 78.995                                |
| Ca_Desig_SNP722 | [T/G] | Ca_Desig_LG01       | 79.324                                |
| Ca_Desig_SNP723 | [A/G] | Ca_Desig_LG01       | 79.431                                |
| Ca_Desig_SNP724 | [G/A] | Ca_Desig_LG01       | 80.720                                |
| Ca_Desig_SNP725 | [T/G] | Ca_Desig_LG01       | 80.791                                |
| Ca_Desig_SNP726 | [T/G] | Ca_Desig_LG01       | 80.988                                |
| Ca_Desig_SNP727 | [A/C] | Ca_Desig_LG01       | 81.116                                |
| Ca_Desig_SNP728 | [C/T] | Ca_Desig_LG01       | 81.151                                |
| Ca_Desig_SNP729 | [T/C] | Ca_Desig_LG01       | 81.184                                |
| Ca_Desig_SNP730 | [C/T] | Ca_Desig_LG01       | 81.557                                |
| Ca_Desig_SNP731 | [T/C] | Ca_Desig_LG01       | 82.277                                |
| Ca_Desig_SNP732 | [A/G] | Ca_Desig_LG01       | 83.102                                |
| Ca_Desig_SNP733 | [G/A] | Ca_Desig_LG01       | 83.657                                |
| Ca_Desig_SNP734 | [A/T] | Ca_Desig_LG01       | 84.062                                |
| Ca_Desig_SNP735 | [T/C] | Ca_Desig_LG01       | 85.443                                |
| Ca_Desig_SNP736 | [A/G] | Ca_Desig_LG01       | 86.076                                |
| Ca_Desig_SNP737 | [A/G] | Ca_Desig_LG02       | 0.000                                 |
| Ca_Desig_SNP738 | [A/C] | Ca_Desig_LG02       | 1.214                                 |
| Ca_Desig_SNP739 | [T/C] | Ca_Desig_LG02       | 2.230                                 |
| Ca_Desig_SNP740 | [C/A] | Ca_Desig_LG02       | 2.321                                 |
| Ca_Desig_SNP741 | [T/A] | Ca_Desig_LG02       | 2.705                                 |
| Ca_Desig_SNP742 | [A/C] | Ca_Desig_LG02       | 2.849                                 |
| Ca_Desig_SNP743 | [G/C] | Ca_Desig_LG02       | 3.178                                 |
| Ca_Desig_SNP744 | [T/C] | Ca_Desig_LG02       | 3.418                                 |
| Ca_Desig_SNP745 | [G/A] | Ca_Desig_LG02       | 3.585                                 |
| Ca_Desig_SNP746 | [G/C] | Ca_Desig_LG02       | 4.524                                 |
| Ca_Desig_SNP747 | [T/G] | Ca_Desig_LG02       | 4.552                                 |
| Ca_Desig_SNP748 | [A/G] | Ca_Desig_LG02       | 5.233                                 |
| Ca_Desig_SNP749 | [G/A] | Ca_Desig_LG02       | 5.373                                 |
| Ca_Desig_SNP750 | [T/C] | Ca_Desig_LG02       | 5.473                                 |
| Ca_Desig_SNP751 | [T/C] | Ca_Desig_LG02       | 7.891                                 |
| Ca_Desig_SNP752 | [G/A] | Ca_Desig_LG02       | 9.224                                 |
| Ca_Desig_SNP753 | [T/C] | Ca_Desig_LG02       | 9.275                                 |
| Ca_Desig_SNP754 | [G/A] | Ca_Desig_LG02       | 10.101                                |
| Ca_Desig_SNP755 | [T/C] | Ca_Desig_LG02       | 11.016                                |
| Ca_Desig_SNP756 | [T/G] | Ca_Desig_LG02       | 11.641                                |
| Ca_Desig_SNP757 | [T/C] | Ca_Desig_LG02       | 11.958                                |
| Ca_Desig_SNP758 | [T/C] | Ca_Desig_LG02       | 12.025                                |
| Ca_Desig_SNP759 | [A/C] | Ca_Desig_LG02       | 12.451                                |
| Ca_Desig_SNP760 | [C/A] | Ca_Desig_LG02       | 12.634                                |
| Ca_Desig_SNP761 | [T/G] | Ca_Desig_LG02       | 12.680                                |
| Ca_Desig_SNP762 | [C/G] | Ca_Desig_LG02       | 13.743                                |
| Ca_Desig_SNP763 | [A/G] | Ca_Desig_LG02       | 14.012                                |
| Ca_Desig_SNP764 | [T/C] | Ca_Desig_LG02       | 14.531                                |
| Ca_Desig_SNP765 | [T/C] | Ca_Desig_LG02       | 14.980                                |

| <b>SNP IDs</b>  | <b>SNPs</b> | <b>Linkage Group (LGs)</b> | <b>Genetic positions (cM) of mapped SNPs</b> |
|-----------------|-------------|----------------------------|----------------------------------------------|
| Ca_Desig_SNP766 | [G/A]       | Ca_Desig_LG02              | 15.083                                       |
| Ca_Desig_SNP767 | [A/T]       | Ca_Desig_LG02              | 15.150                                       |
| Ca_Desig_SNP768 | [G/T]       | Ca_Desig_LG02              | 15.258                                       |
| Ca_Desig_SNP769 | [A/T]       | Ca_Desig_LG02              | 15.314                                       |
| Ca_Desig_SNP770 | [T/G]       | Ca_Desig_LG02              | 15.882                                       |
| Ca_Desig_SNP771 | [T/C]       | Ca_Desig_LG02              | 16.304                                       |
| Ca_Desig_SNP772 | [A/T]       | Ca_Desig_LG02              | 16.619                                       |
| Ca_Desig_SNP773 | [A/T]       | Ca_Desig_LG02              | 16.870                                       |
| Ca_Desig_SNP774 | [A/C]       | Ca_Desig_LG02              | 17.433                                       |
| Ca_Desig_SNP775 | [T/C]       | Ca_Desig_LG02              | 17.461                                       |
| Ca_Desig_SNP776 | [C/A]       | Ca_Desig_LG02              | 17.586                                       |
| Ca_Desig_SNP777 | [T/G]       | Ca_Desig_LG02              | 17.692                                       |
| Ca_Desig_SNP778 | [A/G]       | Ca_Desig_LG02              | 18.172                                       |
| Ca_Desig_SNP779 | [T/C]       | Ca_Desig_LG02              | 18.309                                       |
| Ca_Desig_SNP780 | [T/G]       | Ca_Desig_LG02              | 18.389                                       |
| Ca_Desig_SNP781 | [T/C]       | Ca_Desig_LG02              | 18.513                                       |
| Ca_Desig_SNP782 | [C/A]       | Ca_Desig_LG02              | 18.518                                       |
| Ca_Desig_SNP783 | [A/C]       | Ca_Desig_LG02              | 19.265                                       |
| Ca_Desig_SNP784 | [T/C]       | Ca_Desig_LG02              | 19.321                                       |
| Ca_Desig_SNP785 | [T/C]       | Ca_Desig_LG02              | 19.553                                       |
| Ca_Desig_SNP786 | [T/G]       | Ca_Desig_LG02              | 19.609                                       |
| Ca_Desig_SNP787 | [A/C]       | Ca_Desig_LG02              | 19.941                                       |
| Ca_Desig_SNP788 | [T/C]       | Ca_Desig_LG02              | 20.521                                       |
| Ca_Desig_SNP789 | [T/G]       | Ca_Desig_LG02              | 20.549                                       |
| Ca_Desig_SNP790 | [T/C]       | Ca_Desig_LG02              | 20.817                                       |
| Ca_Desig_SNP791 | [C/T]       | Ca_Desig_LG02              | 20.818                                       |
| Ca_Desig_SNP792 | [G/A]       | Ca_Desig_LG02              | 20.867                                       |
| Ca_Desig_SNP793 | [T/C]       | Ca_Desig_LG02              | 20.974                                       |
| Ca_Desig_SNP794 | [G/A]       | Ca_Desig_LG02              | 21.063                                       |
| Ca_Desig_SNP795 | [A/G]       | Ca_Desig_LG02              | 21.077                                       |
| Ca_Desig_SNP796 | [A/G]       | Ca_Desig_LG02              | 21.137                                       |
| Ca_Desig_SNP797 | [T/G]       | Ca_Desig_LG02              | 21.428                                       |
| Ca_Desig_SNP798 | [T/G]       | Ca_Desig_LG02              | 21.477                                       |
| Ca_Desig_SNP799 | [G/A]       | Ca_Desig_LG02              | 21.635                                       |
| Ca_Desig_SNP800 | [T/C]       | Ca_Desig_LG02              | 21.691                                       |
| Ca_Desig_SNP801 | [A/C]       | Ca_Desig_LG02              | 21.729                                       |
| Ca_Desig_SNP802 | [G/A]       | Ca_Desig_LG02              | 21.745                                       |
| Ca_Desig_SNP803 | [C/A]       | Ca_Desig_LG02              | 21.885                                       |
| Ca_Desig_SNP804 | [T/C]       | Ca_Desig_LG02              | 21.920                                       |
| Ca_Desig_SNP805 | [T/C]       | Ca_Desig_LG02              | 22.093                                       |
| Ca_Desig_SNP806 | [A/C]       | Ca_Desig_LG02              | 22.119                                       |
| Ca_Desig_SNP807 | [T/A]       | Ca_Desig_LG02              | 22.167                                       |
| Ca_Desig_SNP808 | [A/G]       | Ca_Desig_LG02              | 22.278                                       |
| Ca_Desig_SNP809 | [A/C]       | Ca_Desig_LG02              | 22.364                                       |
| Ca_Desig_SNP810 | [A/G]       | Ca_Desig_LG02              | 22.608                                       |
| Ca_Desig_SNP811 | [A/C]       | Ca_Desig_LG02              | 22.887                                       |
| Ca_Desig_SNP812 | [T/C]       | Ca_Desig_LG02              | 22.891                                       |
| Ca_Desig_SNP813 | [A/G]       | Ca_Desig_LG02              | 23.051                                       |

| <b>SNP IDs</b>  | <b>SNPs</b> | <b>Linkage Group (LGs)</b> | <b>Genetic positions (cM) of mapped SNPs</b> |
|-----------------|-------------|----------------------------|----------------------------------------------|
| Ca_Desig_SNP814 | [T/C]       | Ca_Desig_LG02              | 23.058                                       |
| Ca_Desig_SNP815 | [C/T]       | Ca_Desig_LG02              | 23.124                                       |
| Ca_Desig_SNP816 | [A/G]       | Ca_Desig_LG02              | 23.432                                       |
| Ca_Desig_SNP817 | [G/A]       | Ca_Desig_LG02              | 23.490                                       |
| Ca_Desig_SNP818 | [A/G]       | Ca_Desig_LG02              | 23.629                                       |
| Ca_Desig_SNP819 | [T/C]       | Ca_Desig_LG02              | 23.857                                       |
| Ca_Desig_SNP820 | [T/C]       | Ca_Desig_LG02              | 24.070                                       |
| Ca_Desig_SNP821 | [T/G]       | Ca_Desig_LG02              | 24.119                                       |
| Ca_Desig_SNP822 | [A/G]       | Ca_Desig_LG02              | 24.210                                       |
| Ca_Desig_SNP823 | [G/A]       | Ca_Desig_LG02              | 24.800                                       |
| Ca_Desig_SNP824 | [A/G]       | Ca_Desig_LG02              | 24.898                                       |
| Ca_Desig_SNP825 | [T/C]       | Ca_Desig_LG02              | 25.050                                       |
| Ca_Desig_SNP826 | [T/A]       | Ca_Desig_LG02              | 25.066                                       |
| Ca_Desig_SNP827 | [T/A]       | Ca_Desig_LG02              | 25.120                                       |
| Ca_Desig_SNP828 | [A/G]       | Ca_Desig_LG02              | 25.309                                       |
| Ca_Desig_SNP829 | [T/C]       | Ca_Desig_LG02              | 25.333                                       |
| Ca_Desig_SNP830 | [A/G]       | Ca_Desig_LG02              | 25.439                                       |
| Ca_Desig_SNP831 | [C/T]       | Ca_Desig_LG02              | 25.855                                       |
| Ca_Desig_SNP832 | [A/C]       | Ca_Desig_LG02              | 25.904                                       |
| Ca_Desig_SNP833 | [A/C]       | Ca_Desig_LG02              | 25.933                                       |
| Ca_Desig_SNP834 | [A/T]       | Ca_Desig_LG02              | 26.100                                       |
| Ca_Desig_SNP835 | [C/G]       | Ca_Desig_LG02              | 26.656                                       |
| Ca_Desig_SNP836 | [T/A]       | Ca_Desig_LG02              | 27.158                                       |
| Ca_Desig_SNP837 | [A/G]       | Ca_Desig_LG02              | 27.533                                       |
| Ca_Desig_SNP838 | [C/T]       | Ca_Desig_LG02              | 27.628                                       |
| Ca_Desig_SNP839 | [G/A]       | Ca_Desig_LG02              | 27.721                                       |
| Ca_Desig_SNP840 | [A/G]       | Ca_Desig_LG02              | 27.733                                       |
| Ca_Desig_SNP841 | [A/C]       | Ca_Desig_LG02              | 27.796                                       |
| Ca_Desig_SNP842 | [G/A]       | Ca_Desig_LG02              | 28.259                                       |
| Ca_Desig_SNP843 | [T/C]       | Ca_Desig_LG02              | 28.908                                       |
| Ca_Desig_SNP844 | [G/A]       | Ca_Desig_LG02              | 29.047                                       |
| Ca_Desig_SNP845 | [T/A]       | Ca_Desig_LG02              | 29.183                                       |
| Ca_Desig_SNP846 | [T/G]       | Ca_Desig_LG02              | 29.245                                       |
| Ca_Desig_SNP847 | [A/G]       | Ca_Desig_LG02              | 29.256                                       |
| Ca_Desig_SNP848 | [A/G]       | Ca_Desig_LG02              | 29.496                                       |
| Ca_Desig_SNP849 | [A/C]       | Ca_Desig_LG02              | 29.763                                       |
| Ca_Desig_SNP850 | [G/A]       | Ca_Desig_LG02              | 29.795                                       |
| Ca_Desig_SNP851 | [T/A]       | Ca_Desig_LG02              | 29.852                                       |
| Ca_Desig_SNP852 | [A/T]       | Ca_Desig_LG02              | 29.921                                       |
| Ca_Desig_SNP853 | [T/G]       | Ca_Desig_LG02              | 30.107                                       |
| Ca_Desig_SNP854 | [T/C]       | Ca_Desig_LG02              | 30.425                                       |
| Ca_Desig_SNP855 | [T/C]       | Ca_Desig_LG02              | 30.539                                       |
| Ca_Desig_SNP856 | [A/G]       | Ca_Desig_LG02              | 30.705                                       |
| Ca_Desig_SNP857 | [C/A]       | Ca_Desig_LG02              | 31.030                                       |
| Ca_Desig_SNP858 | [A/C]       | Ca_Desig_LG02              | 31.546                                       |
| Ca_Desig_SNP859 | [A/C]       | Ca_Desig_LG02              | 31.685                                       |
| Ca_Desig_SNP860 | [C/A]       | Ca_Desig_LG02              | 31.885                                       |
| Ca_Desig_SNP861 | [T/C]       | Ca_Desig_LG02              | 32.043                                       |

| <b>SNP IDs</b> | <b>SNPs</b> | <b>Linkage Group (LGs)</b> | <b>Genetic positions (cM) of mapped SNPs</b> |
|----------------|-------------|----------------------------|----------------------------------------------|
| Ca_Desi_SNP862 | [A/G]       | <i>Ca_Desi_LG02</i>        | 32.138                                       |
| Ca_Desi_SNP863 | [T/C]       | <i>Ca_Desi_LG02</i>        | 32.173                                       |
| Ca_Desi_SNP864 | [A/G]       | <i>Ca_Desi_LG02</i>        | 32.299                                       |
| Ca_Desi_SNP865 | [C/G]       | <i>Ca_Desi_LG02</i>        | 32.838                                       |
| Ca_Desi_SNP866 | [A/G]       | <i>Ca_Desi_LG02</i>        | 33.033                                       |
| Ca_Desi_SNP867 | [T/G]       | <i>Ca_Desi_LG02</i>        | 33.064                                       |
| Ca_Desi_SNP868 | [C/A]       | <i>Ca_Desi_LG02</i>        | 33.317                                       |
| Ca_Desi_SNP869 | [A/G]       | <i>Ca_Desi_LG02</i>        | 33.349                                       |
| Ca_Desi_SNP870 | [T/C]       | <i>Ca_Desi_LG02</i>        | 33.681                                       |
| Ca_Desi_SNP871 | [A/C]       | <i>Ca_Desi_LG02</i>        | 33.849                                       |
| Ca_Desi_SNP872 | [T/C]       | <i>Ca_Desi_LG02</i>        | 33.916                                       |
| Ca_Desi_SNP873 | [C/T]       | <i>Ca_Desi_LG02</i>        | 34.145                                       |
| Ca_Desi_SNP874 | [T/C]       | <i>Ca_Desi_LG02</i>        | 34.232                                       |
| Ca_Desi_SNP875 | [T/G]       | <i>Ca_Desi_LG02</i>        | 34.764                                       |
| Ca_Desi_SNP876 | [T/G]       | <i>Ca_Desi_LG02</i>        | 34.918                                       |
| Ca_Desi_SNP877 | [T/G]       | <i>Ca_Desi_LG02</i>        | 34.948                                       |
| Ca_Desi_SNP878 | [A/C]       | <i>Ca_Desi_LG02</i>        | 35.093                                       |
| Ca_Desi_SNP879 | [T/G]       | <i>Ca_Desi_LG02</i>        | 35.137                                       |
| Ca_Desi_SNP880 | [G/T]       | <i>Ca_Desi_LG02</i>        | 35.342                                       |
| Ca_Desi_SNP881 | [T/G]       | <i>Ca_Desi_LG02</i>        | 35.542                                       |
| Ca_Desi_SNP882 | [A/C]       | <i>Ca_Desi_LG02</i>        | 35.612                                       |
| Ca_Desi_SNP883 | [C/T]       | <i>Ca_Desi_LG02</i>        | 36.356                                       |
| Ca_Desi_SNP884 | [A/G]       | <i>Ca_Desi_LG02</i>        | 36.425                                       |
| Ca_Desi_SNP885 | [T/G]       | <i>Ca_Desi_LG02</i>        | 36.447                                       |
| Ca_Desi_SNP886 | [C/T]       | <i>Ca_Desi_LG02</i>        | 36.827                                       |
| Ca_Desi_SNP887 | [T/C]       | <i>Ca_Desi_LG02</i>        | 36.944                                       |
| Ca_Desi_SNP888 | [A/G]       | <i>Ca_Desi_LG02</i>        | 37.013                                       |
| Ca_Desi_SNP889 | [T/C]       | <i>Ca_Desi_LG02</i>        | 37.014                                       |
| Ca_Desi_SNP890 | [C/T]       | <i>Ca_Desi_LG02</i>        | 37.154                                       |
| Ca_Desi_SNP891 | [T/G]       | <i>Ca_Desi_LG02</i>        | 37.288                                       |
| Ca_Desi_SNP892 | [T/G]       | <i>Ca_Desi_LG02</i>        | 37.346                                       |
| Ca_Desi_SNP893 | [T/C]       | <i>Ca_Desi_LG02</i>        | 37.627                                       |
| Ca_Desi_SNP894 | [A/T]       | <i>Ca_Desi_LG02</i>        | 37.650                                       |
| Ca_Desi_SNP895 | [A/G]       | <i>Ca_Desi_LG02</i>        | 37.724                                       |
| Ca_Desi_SNP896 | [A/G]       | <i>Ca_Desi_LG02</i>        | 37.791                                       |
| Ca_Desi_SNP897 | [C/A]       | <i>Ca_Desi_LG02</i>        | 38.127                                       |
| Ca_Desi_SNP898 | [A/T]       | <i>Ca_Desi_LG02</i>        | 38.647                                       |
| Ca_Desi_SNP899 | [A/C]       | <i>Ca_Desi_LG02</i>        | 38.934                                       |
| Ca_Desi_SNP900 | [A/C]       | <i>Ca_Desi_LG02</i>        | 38.993                                       |
| Ca_Desi_SNP901 | [G/A]       | <i>Ca_Desi_LG02</i>        | 39.121                                       |
| Ca_Desi_SNP902 | [A/G]       | <i>Ca_Desi_LG02</i>        | 39.180                                       |
| Ca_Desi_SNP903 | [G/T]       | <i>Ca_Desi_LG02</i>        | 39.185                                       |
| Ca_Desi_SNP904 | [T/G]       | <i>Ca_Desi_LG02</i>        | 39.252                                       |
| Ca_Desi_SNP905 | [T/G]       | <i>Ca_Desi_LG02</i>        | 39.293                                       |
| Ca_Desi_SNP906 | [A/G]       | <i>Ca_Desi_LG02</i>        | 39.444                                       |
| Ca_Desi_SNP907 | [C/T]       | <i>Ca_Desi_LG02</i>        | 39.562                                       |
| Ca_Desi_SNP908 | [A/C]       | <i>Ca_Desi_LG02</i>        | 39.624                                       |
| Ca_Desi_SNP909 | [A/C]       | <i>Ca_Desi_LG02</i>        | 39.980                                       |

| <b>SNP IDs</b>  | <b>SNPs</b> | <b>Linkage Group (LGs)</b> | <b>Genetic positions (cM) of mapped SNPs</b> |
|-----------------|-------------|----------------------------|----------------------------------------------|
| Ca_Desig_SNP910 | [A/G]       | Ca_Desig_LG02              | 40.124                                       |
| Ca_Desig_SNP911 | [C/T]       | Ca_Desig_LG02              | 40.142                                       |
| Ca_Desig_SNP912 | [T/G]       | Ca_Desig_LG02              | 40.301                                       |
| Ca_Desig_SNP913 | [A/G]       | Ca_Desig_LG02              | 40.539                                       |
| Ca_Desig_SNP914 | [T/C]       | Ca_Desig_LG02              | 40.704                                       |
| Ca_Desig_SNP915 | [G/A]       | Ca_Desig_LG02              | 40.720                                       |
| Ca_Desig_SNP916 | [T/C]       | Ca_Desig_LG02              | 41.617                                       |
| Ca_Desig_SNP917 | [G/A]       | Ca_Desig_LG02              | 41.658                                       |
| Ca_Desig_SNP918 | [A/C]       | Ca_Desig_LG02              | 41.692                                       |
| Ca_Desig_SNP919 | [A/G]       | Ca_Desig_LG02              | 42.477                                       |
| Ca_Desig_SNP920 | [G/T]       | Ca_Desig_LG02              | 42.882                                       |
| Ca_Desig_SNP921 | [T/C]       | Ca_Desig_LG02              | 42.945                                       |
| Ca_Desig_SNP922 | [A/T]       | Ca_Desig_LG02              | 43.413                                       |
| Ca_Desig_SNP923 | [T/C]       | Ca_Desig_LG02              | 43.734                                       |
| Ca_Desig_SNP924 | [C/T]       | Ca_Desig_LG02              | 43.831                                       |
| Ca_Desig_SNP925 | [G/C]       | Ca_Desig_LG02              | 44.265                                       |
| Ca_Desig_SNP926 | [A/G]       | Ca_Desig_LG02              | 44.290                                       |
| Ca_Desig_SNP927 | [T/G]       | Ca_Desig_LG02              | 44.375                                       |
| Ca_Desig_SNP928 | [A/G]       | Ca_Desig_LG02              | 44.910                                       |
| Ca_Desig_SNP929 | [A/G]       | Ca_Desig_LG02              | 44.960                                       |
| Ca_Desig_SNP930 | [A/G]       | Ca_Desig_LG02              | 45.077                                       |
| Ca_Desig_SNP931 | [T/C]       | Ca_Desig_LG02              | 45.150                                       |
| Ca_Desig_SNP932 | [T/C]       | Ca_Desig_LG02              | 45.243                                       |
| Ca_Desig_SNP933 | [A/G]       | Ca_Desig_LG02              | 45.244                                       |
| Ca_Desig_SNP934 | [G/C]       | Ca_Desig_LG02              | 45.348                                       |
| Ca_Desig_SNP935 | [C/T]       | Ca_Desig_LG02              | 45.682                                       |
| Ca_Desig_SNP936 | [T/A]       | Ca_Desig_LG02              | 46.011                                       |
| Ca_Desig_SNP937 | [T/C]       | Ca_Desig_LG02              | 46.237                                       |
| Ca_Desig_SNP938 | [A/G]       | Ca_Desig_LG02              | 46.457                                       |
| Ca_Desig_SNP939 | [T/G]       | Ca_Desig_LG02              | 47.310                                       |
| Ca_Desig_SNP940 | [G/A]       | Ca_Desig_LG02              | 47.410                                       |
| Ca_Desig_SNP941 | [T/C]       | Ca_Desig_LG02              | 47.550                                       |
| Ca_Desig_SNP942 | [C/T]       | Ca_Desig_LG02              | 47.879                                       |
| Ca_Desig_SNP943 | [C/T]       | Ca_Desig_LG02              | 47.915                                       |
| Ca_Desig_SNP944 | [C/A]       | Ca_Desig_LG02              | 47.932                                       |
| Ca_Desig_SNP945 | [G/A]       | Ca_Desig_LG02              | 48.243                                       |
| Ca_Desig_SNP946 | [T/C]       | Ca_Desig_LG02              | 48.400                                       |
| Ca_Desig_SNP947 | [C/T]       | Ca_Desig_LG02              | 48.937                                       |
| Ca_Desig_SNP948 | [G/A]       | Ca_Desig_LG02              | 48.982                                       |
| Ca_Desig_SNP949 | [T/C]       | Ca_Desig_LG02              | 49.010                                       |
| Ca_Desig_SNP950 | [T/A]       | Ca_Desig_LG02              | 49.068                                       |
| Ca_Desig_SNP951 | [G/A]       | Ca_Desig_LG02              | 49.205                                       |
| Ca_Desig_SNP952 | [T/C]       | Ca_Desig_LG02              | 49.209                                       |
| Ca_Desig_SNP953 | [T/A]       | Ca_Desig_LG02              | 49.216                                       |
| Ca_Desig_SNP954 | [G/A]       | Ca_Desig_LG02              | 49.449                                       |
| Ca_Desig_SNP955 | [G/A]       | Ca_Desig_LG02              | 49.517                                       |
| Ca_Desig_SNP956 | [C/T]       | Ca_Desig_LG02              | 49.985                                       |
| Ca_Desig_SNP957 | [T/G]       | Ca_Desig_LG02              | 50.016                                       |

| <b>SNP IDs</b>   | <b>SNPs</b> | <b>Linkage Group (LGs)</b> | <b>Genetic positions (cM) of mapped SNPs</b> |
|------------------|-------------|----------------------------|----------------------------------------------|
| Ca_Desig_SNP958  | [C/A]       | Ca_Desig_LG02              | 50.036                                       |
| Ca_Desig_SNP959  | [C/G]       | Ca_Desig_LG02              | 50.308                                       |
| Ca_Desig_SNP960  | [T/C]       | Ca_Desig_LG02              | 50.363                                       |
| Ca_Desig_SNP961  | [T/C]       | Ca_Desig_LG02              | 50.639                                       |
| Ca_Desig_SNP962  | [T/C]       | Ca_Desig_LG02              | 50.648                                       |
| Ca_Desig_SNP963  | [G/T]       | Ca_Desig_LG02              | 50.652                                       |
| Ca_Desig_SNP964  | [T/G]       | Ca_Desig_LG02              | 50.946                                       |
| Ca_Desig_SNP965  | [C/A]       | Ca_Desig_LG02              | 51.231                                       |
| Ca_Desig_SNP966  | [G/A]       | Ca_Desig_LG02              | 51.885                                       |
| Ca_Desig_SNP967  | [A/C]       | Ca_Desig_LG02              | 51.989                                       |
| Ca_Desig_SNP968  | [G/C]       | Ca_Desig_LG02              | 52.048                                       |
| Ca_Desig_SNP969  | [T/A]       | Ca_Desig_LG02              | 52.068                                       |
| Ca_Desig_SNP970  | [T/C]       | Ca_Desig_LG02              | 52.123                                       |
| Ca_Desig_SNP971  | [A/G]       | Ca_Desig_LG02              | 52.349                                       |
| Ca_Desig_SNP972  | [A/T]       | Ca_Desig_LG02              | 52.638                                       |
| Ca_Desig_SNP973  | [C/A]       | Ca_Desig_LG02              | 52.651                                       |
| Ca_Desig_SNP974  | [T/G]       | Ca_Desig_LG02              | 52.735                                       |
| Ca_Desig_SNP975  | [G/T]       | Ca_Desig_LG02              | 53.175                                       |
| Ca_Desig_SNP976  | [C/T]       | Ca_Desig_LG02              | 53.193                                       |
| Ca_Desig_SNP977  | [T/G]       | Ca_Desig_LG02              | 53.228                                       |
| Ca_Desig_SNP978  | [T/C]       | Ca_Desig_LG02              | 53.302                                       |
| Ca_Desig_SNP979  | [T/G]       | Ca_Desig_LG02              | 53.826                                       |
| Ca_Desig_SNP980  | [G/T]       | Ca_Desig_LG02              | 53.899                                       |
| Ca_Desig_SNP981  | [A/G]       | Ca_Desig_LG02              | 54.043                                       |
| Ca_Desig_SNP982  | [A/G]       | Ca_Desig_LG02              | 54.108                                       |
| Ca_Desig_SNP983  | [C/T]       | Ca_Desig_LG02              | 54.195                                       |
| Ca_Desig_SNP984  | [G/T]       | Ca_Desig_LG02              | 54.289                                       |
| Ca_Desig_SNP985  | [C/A]       | Ca_Desig_LG02              | 54.437                                       |
| Ca_Desig_SNP986  | [G/A]       | Ca_Desig_LG02              | 54.503                                       |
| Ca_Desig_SNP987  | [C/G]       | Ca_Desig_LG02              | 54.567                                       |
| Ca_Desig_SNP988  | [G/A]       | Ca_Desig_LG02              | 54.772                                       |
| Ca_Desig_SNP989  | [A/T]       | Ca_Desig_LG02              | 54.802                                       |
| Ca_Desig_SNP990  | [A/C]       | Ca_Desig_LG02              | 54.924                                       |
| Ca_Desig_SNP991  | [A/G]       | Ca_Desig_LG02              | 55.085                                       |
| Ca_Desig_SNP992  | [T/C]       | Ca_Desig_LG02              | 55.249                                       |
| Ca_Desig_SNP993  | [G/A]       | Ca_Desig_LG02              | 55.257                                       |
| Ca_Desig_SNP994  | [C/A]       | Ca_Desig_LG02              | 55.312                                       |
| Ca_Desig_SNP995  | [T/A]       | Ca_Desig_LG02              | 55.927                                       |
| Ca_Desig_SNP996  | [A/G]       | Ca_Desig_LG02              | 55.981                                       |
| Ca_Desig_SNP997  | [A/T]       | Ca_Desig_LG02              | 55.986                                       |
| Ca_Desig_SNP998  | [A/G]       | Ca_Desig_LG02              | 56.016                                       |
| Ca_Desig_SNP999  | [G/T]       | Ca_Desig_LG02              | 56.089                                       |
| Ca_Desig_SNP1000 | [G/A]       | Ca_Desig_LG02              | 56.102                                       |
| Ca_Desig_SNP1001 | [T/G]       | Ca_Desig_LG02              | 56.228                                       |
| Ca_Desig_SNP1002 | [A/C]       | Ca_Desig_LG02              | 56.264                                       |
| Ca_Desig_SNP1003 | [A/G]       | Ca_Desig_LG02              | 56.473                                       |
| Ca_Desig_SNP1004 | [T/C]       | Ca_Desig_LG02              | 56.846                                       |
| Ca_Desig_SNP1005 | [T/G]       | Ca_Desig_LG02              | 57.359                                       |

| <b>SNP IDs</b>  | <b>SNPs</b> | <b>Linkage Group (LGs)</b> | <b>Genetic positions (cM) of mapped SNPs</b> |
|-----------------|-------------|----------------------------|----------------------------------------------|
| Ca_Desi_SNP1006 | [C/T]       | <i>Ca_Desi_LG02</i>        | 57.412                                       |
| Ca_Desi_SNP1007 | [C/A]       | <i>Ca_Desi_LG02</i>        | 57.551                                       |
| Ca_Desi_SNP1008 | [A/T]       | <i>Ca_Desi_LG02</i>        | 57.713                                       |
| Ca_Desi_SNP1009 | [G/A]       | <i>Ca_Desi_LG02</i>        | 57.750                                       |
| Ca_Desi_SNP1010 | [T/G]       | <i>Ca_Desi_LG02</i>        | 57.777                                       |
| Ca_Desi_SNP1011 | [A/C]       | <i>Ca_Desi_LG02</i>        | 58.051                                       |
| Ca_Desi_SNP1012 | [G/A]       | <i>Ca_Desi_LG02</i>        | 58.324                                       |
| Ca_Desi_SNP1013 | [A/T]       | <i>Ca_Desi_LG02</i>        | 58.332                                       |
| Ca_Desi_SNP1014 | [G/C]       | <i>Ca_Desi_LG02</i>        | 58.377                                       |
| Ca_Desi_SNP1015 | [A/C]       | <i>Ca_Desi_LG02</i>        | 58.567                                       |
| Ca_Desi_SNP1016 | [T/G]       | <i>Ca_Desi_LG02</i>        | 58.677                                       |
| Ca_Desi_SNP1017 | [C/A]       | <i>Ca_Desi_LG02</i>        | 58.762                                       |
| Ca_Desi_SNP1018 | [T/G]       | <i>Ca_Desi_LG02</i>        | 58.762                                       |
| Ca_Desi_SNP1019 | [C/T]       | <i>Ca_Desi_LG02</i>        | 58.922                                       |
| Ca_Desi_SNP1020 | [T/C]       | <i>Ca_Desi_LG02</i>        | 58.949                                       |
| Ca_Desi_SNP1021 | [C/T]       | <i>Ca_Desi_LG02</i>        | 59.223                                       |
| Ca_Desi_SNP1022 | [T/A]       | <i>Ca_Desi_LG02</i>        | 59.346                                       |
| Ca_Desi_SNP1023 | [T/A]       | <i>Ca_Desi_LG02</i>        | 59.390                                       |
| Ca_Desi_SNP1024 | [T/A]       | <i>Ca_Desi_LG02</i>        | 59.450                                       |
| Ca_Desi_SNP1025 | [T/G]       | <i>Ca_Desi_LG02</i>        | 59.468                                       |
| Ca_Desi_SNP1026 | [A/C]       | <i>Ca_Desi_LG02</i>        | 59.628                                       |
| Ca_Desi_SNP1027 | [C/G]       | <i>Ca_Desi_LG02</i>        | 59.686                                       |
| Ca_Desi_SNP1028 | [T/C]       | <i>Ca_Desi_LG02</i>        | 59.829                                       |
| Ca_Desi_SNP1029 | [A/G]       | <i>Ca_Desi_LG02</i>        | 59.951                                       |
| Ca_Desi_SNP1030 | [C/A]       | <i>Ca_Desi_LG02</i>        | 59.959                                       |
| Ca_Desi_SNP1031 | [T/C]       | <i>Ca_Desi_LG02</i>        | 60.029                                       |
| Ca_Desi_SNP1032 | [C/T]       | <i>Ca_Desi_LG02</i>        | 60.051                                       |
| Ca_Desi_SNP1033 | [G/A]       | <i>Ca_Desi_LG02</i>        | 60.245                                       |
| Ca_Desi_SNP1034 | [T/A]       | <i>Ca_Desi_LG02</i>        | 60.455                                       |
| Ca_Desi_SNP1035 | [A/G]       | <i>Ca_Desi_LG02</i>        | 60.602                                       |
| Ca_Desi_SNP1036 | [T/A]       | <i>Ca_Desi_LG02</i>        | 60.686                                       |
| Ca_Desi_SNP1037 | [G/T]       | <i>Ca_Desi_LG02</i>        | 60.867                                       |
| Ca_Desi_SNP1038 | [T/C]       | <i>Ca_Desi_LG02</i>        | 60.894                                       |
| Ca_Desi_SNP1039 | [T/G]       | <i>Ca_Desi_LG02</i>        | 60.983                                       |
| Ca_Desi_SNP1040 | [A/G]       | <i>Ca_Desi_LG02</i>        | 61.095                                       |
| Ca_Desi_SNP1041 | [G/A]       | <i>Ca_Desi_LG02</i>        | 61.202                                       |
| Ca_Desi_SNP1042 | [G/T]       | <i>Ca_Desi_LG02</i>        | 61.380                                       |
| Ca_Desi_SNP1043 | [G/A]       | <i>Ca_Desi_LG02</i>        | 61.623                                       |
| Ca_Desi_SNP1044 | [G/T]       | <i>Ca_Desi_LG02</i>        | 61.640                                       |
| Ca_Desi_SNP1045 | [C/T]       | <i>Ca_Desi_LG02</i>        | 61.801                                       |
| Ca_Desi_SNP1046 | [A/G]       | <i>Ca_Desi_LG02</i>        | 62.123                                       |
| Ca_Desi_SNP1047 | [C/T]       | <i>Ca_Desi_LG02</i>        | 62.540                                       |
| Ca_Desi_SNP1048 | [A/G]       | <i>Ca_Desi_LG02</i>        | 62.579                                       |
| Ca_Desi_SNP1049 | [T/C]       | <i>Ca_Desi_LG02</i>        | 62.887                                       |
| Ca_Desi_SNP1050 | [C/A]       | <i>Ca_Desi_LG02</i>        | 63.252                                       |
| Ca_Desi_SNP1051 | [G/C]       | <i>Ca_Desi_LG02</i>        | 63.283                                       |
| Ca_Desi_SNP1052 | [T/C]       | <i>Ca_Desi_LG02</i>        | 63.294                                       |
| Ca_Desi_SNP1053 | [A/C]       | <i>Ca_Desi_LG02</i>        | 63.480                                       |

| <b>SNP IDs</b>   | <b>SNPs</b> | <b>Linkage Group (LGs)</b> | <b>Genetic positions (cM) of mapped SNPs</b> |
|------------------|-------------|----------------------------|----------------------------------------------|
| Ca_Desig_SNP1054 | [G/C]       | Ca_Desig_LG02              | 63.596                                       |
| Ca_Desig_SNP1055 | [G/A]       | Ca_Desig_LG02              | 63.960                                       |
| Ca_Desig_SNP1056 | [A/C]       | Ca_Desig_LG02              | 63.979                                       |
| Ca_Desig_SNP1057 | [T/G]       | Ca_Desig_LG02              | 64.504                                       |
| Ca_Desig_SNP1058 | [A/G]       | Ca_Desig_LG02              | 64.966                                       |
| Ca_Desig_SNP1059 | [G/A]       | Ca_Desig_LG02              | 65.037                                       |
| Ca_Desig_SNP1060 | [C/T]       | Ca_Desig_LG02              | 65.170                                       |
| Ca_Desig_SNP1061 | [T/C]       | Ca_Desig_LG02              | 65.331                                       |
| Ca_Desig_SNP1062 | [G/A]       | Ca_Desig_LG02              | 65.342                                       |
| Ca_Desig_SNP1063 | [A/T]       | Ca_Desig_LG02              | 65.470                                       |
| Ca_Desig_SNP1064 | [G/C]       | Ca_Desig_LG02              | 65.752                                       |
| Ca_Desig_SNP1065 | [C/A]       | Ca_Desig_LG02              | 65.898                                       |
| Ca_Desig_SNP1066 | [C/T]       | Ca_Desig_LG02              | 65.927                                       |
| Ca_Desig_SNP1067 | [C/A]       | Ca_Desig_LG02              | 66.023                                       |
| Ca_Desig_SNP1068 | [C/T]       | Ca_Desig_LG02              | 66.216                                       |
| Ca_Desig_SNP1069 | [T/C]       | Ca_Desig_LG02              | 66.261                                       |
| Ca_Desig_SNP1070 | [C/G]       | Ca_Desig_LG02              | 66.323                                       |
| Ca_Desig_SNP1071 | [G/T]       | Ca_Desig_LG02              | 66.454                                       |
| Ca_Desig_SNP1072 | [A/G]       | Ca_Desig_LG02              | 66.487                                       |
| Ca_Desig_SNP1073 | [T/G]       | Ca_Desig_LG02              | 66.489                                       |
| Ca_Desig_SNP1074 | [G/A]       | Ca_Desig_LG02              | 66.676                                       |
| Ca_Desig_SNP1075 | [T/G]       | Ca_Desig_LG02              | 66.885                                       |
| Ca_Desig_SNP1076 | [C/T]       | Ca_Desig_LG02              | 66.944                                       |
| Ca_Desig_SNP1077 | [A/G]       | Ca_Desig_LG02              | 67.180                                       |
| Ca_Desig_SNP1078 | [T/C]       | Ca_Desig_LG02              | 67.189                                       |
| Ca_Desig_SNP1079 | [C/A]       | Ca_Desig_LG02              | 67.473                                       |
| Ca_Desig_SNP1080 | [T/C]       | Ca_Desig_LG02              | 68.055                                       |
| Ca_Desig_SNP1081 | [T/G]       | Ca_Desig_LG02              | 68.116                                       |
| Ca_Desig_SNP1082 | [C/G]       | Ca_Desig_LG02              | 68.176                                       |
| Ca_Desig_SNP1083 | [A/C]       | Ca_Desig_LG02              | 68.702                                       |
| Ca_Desig_SNP1084 | [G/A]       | Ca_Desig_LG02              | 69.229                                       |
| Ca_Desig_SNP1085 | [T/C]       | Ca_Desig_LG02              | 69.305                                       |
| Ca_Desig_SNP1086 | [A/T]       | Ca_Desig_LG02              | 69.517                                       |
| Ca_Desig_SNP1087 | [C/A]       | Ca_Desig_LG02              | 70.652                                       |
| Ca_Desig_SNP1088 | [T/C]       | Ca_Desig_LG02              | 71.220                                       |
| Ca_Desig_SNP1089 | [G/A]       | Ca_Desig_LG02              | 71.426                                       |
| Ca_Desig_SNP1090 | [T/C]       | Ca_Desig_LG02              | 71.617                                       |
| Ca_Desig_SNP1091 | [T/C]       | Ca_Desig_LG02              | 72.225                                       |
| Ca_Desig_SNP1092 | [G/T]       | Ca_Desig_LG02              | 72.553                                       |
| Ca_Desig_SNP1093 | [T/G]       | Ca_Desig_LG02              | 72.650                                       |
| Ca_Desig_SNP1094 | [G/A]       | Ca_Desig_LG02              | 72.651                                       |
| Ca_Desig_SNP1095 | [T/C]       | Ca_Desig_LG02              | 72.654                                       |
| Ca_Desig_SNP1096 | [A/G]       | Ca_Desig_LG02              | 72.858                                       |
| Ca_Desig_SNP1097 | [T/C]       | Ca_Desig_LG02              | 73.001                                       |
| Ca_Desig_SNP1098 | [T/G]       | Ca_Desig_LG02              | 73.106                                       |
| Ca_Desig_SNP1099 | [T/C]       | Ca_Desig_LG02              | 73.744                                       |
| Ca_Desig_SNP1100 | [T/G]       | Ca_Desig_LG02              | 73.919                                       |
| Ca_Desig_SNP1101 | [A/T]       | Ca_Desig_LG02              | 74.938                                       |



| <b>SNP IDs</b>   | <b>SNPs</b> | <b>Linkage Group (LGs)</b> | <b>Genetic positions (cM) of mapped SNPs</b> |
|------------------|-------------|----------------------------|----------------------------------------------|
| Ca_Desig_SNP1102 | [T/G]       | Ca_Desig_LG02              | 75.118                                       |
| Ca_Desig_SNP1103 | [T/G]       | Ca_Desig_LG02              | 75.188                                       |
| Ca_Desig_SNP1104 | [A/C]       | Ca_Desig_LG02              | 75.481                                       |
| Ca_Desig_SNP1105 | [A/G]       | Ca_Desig_LG02              | 75.564                                       |
| Ca_Desig_SNP1106 | [G/A]       | Ca_Desig_LG02              | 75.604                                       |
| Ca_Desig_SNP1107 | [A/G]       | Ca_Desig_LG02              | 76.236                                       |
| Ca_Desig_SNP1108 | [T/C]       | Ca_Desig_LG02              | 76.299                                       |
| Ca_Desig_SNP1109 | [T/C]       | Ca_Desig_LG02              | 76.413                                       |
| Ca_Desig_SNP1110 | [T/G]       | Ca_Desig_LG02              | 77.015                                       |
| Ca_Desig_SNP1111 | [A/C]       | Ca_Desig_LG02              | 77.413                                       |
| Ca_Desig_SNP1112 | [G/A]       | Ca_Desig_LG02              | 78.259                                       |
| Ca_Desig_SNP1113 | [A/G]       | Ca_Desig_LG02              | 80.057                                       |
| Ca_Desig_SNP1114 | [T/C]       | Ca_Desig_LG02              | 80.649                                       |
| Ca_Desig_SNP1115 | [T/C]       | Ca_Desig_LG02              | 81.060                                       |
| Ca_Desig_SNP1116 | [A/G]       | Ca_Desig_LG02              | 81.772                                       |
| Ca_Desig_SNP1117 | [G/A]       | Ca_Desig_LG02              | 81.851                                       |
| Ca_Desig_SNP1118 | [G/A]       | Ca_Desig_LG02              | 82.194                                       |
| Ca_Desig_SNP1119 | [T/A]       | Ca_Desig_LG02              | 82.517                                       |
| Ca_Desig_SNP1120 | [T/G]       | Ca_Desig_LG02              | 82.886                                       |
| Ca_Desig_SNP1121 | [A/G]       | Ca_Desig_LG02              | 83.282                                       |
| Ca_Desig_SNP1122 | [T/G]       | Ca_Desig_LG02              | 85.662                                       |
| Ca_Desig_SNP1123 | [A/C]       | Ca_Desig_LG03              | 0.000                                        |
| Ca_Desig_SNP1124 | [A/G]       | Ca_Desig_LG03              | 0.042                                        |
| Ca_Desig_SNP1125 | [A/G]       | Ca_Desig_LG03              | 0.388                                        |
| Ca_Desig_SNP1126 | [G/A]       | Ca_Desig_LG03              | 0.565                                        |
| Ca_Desig_SNP1127 | [C/T]       | Ca_Desig_LG03              | 0.622                                        |
| Ca_Desig_SNP1128 | [A/C]       | Ca_Desig_LG03              | 1.412                                        |
| Ca_Desig_SNP1129 | [T/C]       | Ca_Desig_LG03              | 2.133                                        |
| Ca_Desig_SNP1130 | [T/C]       | Ca_Desig_LG03              | 2.815                                        |
| Ca_Desig_SNP1131 | [T/G]       | Ca_Desig_LG03              | 3.631                                        |
| Ca_Desig_SNP1132 | [G/A]       | Ca_Desig_LG03              | 3.906                                        |
| Ca_Desig_SNP1133 | [C/A]       | Ca_Desig_LG03              | 3.909                                        |
| Ca_Desig_SNP1134 | [A/G]       | Ca_Desig_LG03              | 4.790                                        |
| Ca_Desig_SNP1135 | [C/T]       | Ca_Desig_LG03              | 5.127                                        |
| Ca_Desig_SNP1136 | [C/T]       | Ca_Desig_LG03              | 5.285                                        |
| Ca_Desig_SNP1137 | [T/G]       | Ca_Desig_LG03              | 6.550                                        |
| Ca_Desig_SNP1138 | [A/G]       | Ca_Desig_LG03              | 6.609                                        |
| Ca_Desig_SNP1139 | [A/T]       | Ca_Desig_LG03              | 6.847                                        |
| Ca_Desig_SNP1140 | [T/G]       | Ca_Desig_LG03              | 7.583                                        |
| Ca_Desig_SNP1141 | [T/C]       | Ca_Desig_LG03              | 7.885                                        |
| Ca_Desig_SNP1142 | [T/C]       | Ca_Desig_LG03              | 7.896                                        |
| Ca_Desig_SNP1143 | [A/T]       | Ca_Desig_LG03              | 8.022                                        |
| Ca_Desig_SNP1144 | [A/C]       | Ca_Desig_LG03              | 8.417                                        |
| Ca_Desig_SNP1145 | [T/C]       | Ca_Desig_LG03              | 8.777                                        |
| Ca_Desig_SNP1146 | [T/A]       | Ca_Desig_LG03              | 8.906                                        |
| Ca_Desig_SNP1147 | [T/G]       | Ca_Desig_LG03              | 9.661                                        |
| Ca_Desig_SNP1148 | [A/G]       | Ca_Desig_LG03              | 10.182                                       |
| Ca_Desig_SNP1149 | [T/C]       | Ca_Desig_LG03              | 10.278                                       |

| <b>SNP IDs</b>   | <b>SNPs</b> | <b>Linkage Group (LGs)</b> | <b>Genetic positions (cM) of mapped SNPs</b> |
|------------------|-------------|----------------------------|----------------------------------------------|
| Ca_Desig_SNP1150 | [A/C]       | Ca_Desig_LG03              | 10.368                                       |
| Ca_Desig_SNP1151 | [T/C]       | Ca_Desig_LG03              | 11.047                                       |
| Ca_Desig_SNP1152 | [A/G]       | Ca_Desig_LG03              | 11.064                                       |
| Ca_Desig_SNP1153 | [G/A]       | Ca_Desig_LG03              | 11.104                                       |
| Ca_Desig_SNP1154 | [T/C]       | Ca_Desig_LG03              | 11.186                                       |
| Ca_Desig_SNP1155 | [A/G]       | Ca_Desig_LG03              | 11.221                                       |
| Ca_Desig_SNP1156 | [T/C]       | Ca_Desig_LG03              | 11.927                                       |
| Ca_Desig_SNP1157 | [C/T]       | Ca_Desig_LG03              | 11.982                                       |
| Ca_Desig_SNP1158 | [C/A]       | Ca_Desig_LG03              | 12.864                                       |
| Ca_Desig_SNP1159 | [C/T]       | Ca_Desig_LG03              | 13.115                                       |
| Ca_Desig_SNP1160 | [G/A]       | Ca_Desig_LG03              | 13.338                                       |
| Ca_Desig_SNP1161 | [A/G]       | Ca_Desig_LG03              | 13.354                                       |
| Ca_Desig_SNP1162 | [A/G]       | Ca_Desig_LG03              | 13.436                                       |
| Ca_Desig_SNP1163 | [T/G]       | Ca_Desig_LG03              | 13.885                                       |
| Ca_Desig_SNP1164 | [C/T]       | Ca_Desig_LG03              | 13.962                                       |
| Ca_Desig_SNP1165 | [A/C]       | Ca_Desig_LG03              | 14.156                                       |
| Ca_Desig_SNP1166 | [T/C]       | Ca_Desig_LG03              | 14.667                                       |
| Ca_Desig_SNP1167 | [T/C]       | Ca_Desig_LG03              | 14.913                                       |
| Ca_Desig_SNP1168 | [C/T]       | Ca_Desig_LG03              | 14.989                                       |
| Ca_Desig_SNP1169 | [T/G]       | Ca_Desig_LG03              | 15.361                                       |
| Ca_Desig_SNP1170 | [T/C]       | Ca_Desig_LG03              | 15.369                                       |
| Ca_Desig_SNP1171 | [A/G]       | Ca_Desig_LG03              | 15.397                                       |
| Ca_Desig_SNP1172 | [T/C]       | Ca_Desig_LG03              | 15.475                                       |
| Ca_Desig_SNP1173 | [A/C]       | Ca_Desig_LG03              | 15.809                                       |
| Ca_Desig_SNP1174 | [T/G]       | Ca_Desig_LG03              | 15.870                                       |
| Ca_Desig_SNP1175 | [A/G]       | Ca_Desig_LG03              | 15.898                                       |
| Ca_Desig_SNP1176 | [C/T]       | Ca_Desig_LG03              | 15.980                                       |
| Ca_Desig_SNP1177 | [A/G]       | Ca_Desig_LG03              | 15.981                                       |
| Ca_Desig_SNP1178 | [A/G]       | Ca_Desig_LG03              | 16.225                                       |
| Ca_Desig_SNP1179 | [T/G]       | Ca_Desig_LG03              | 16.230                                       |
| Ca_Desig_SNP1180 | [T/C]       | Ca_Desig_LG03              | 16.428                                       |
| Ca_Desig_SNP1181 | [C/T]       | Ca_Desig_LG03              | 16.583                                       |
| Ca_Desig_SNP1182 | [T/A]       | Ca_Desig_LG03              | 16.856                                       |
| Ca_Desig_SNP1183 | [C/A]       | Ca_Desig_LG03              | 17.280                                       |
| Ca_Desig_SNP1184 | [A/G]       | Ca_Desig_LG03              | 17.344                                       |
| Ca_Desig_SNP1185 | [A/G]       | Ca_Desig_LG03              | 17.349                                       |
| Ca_Desig_SNP1186 | [A/G]       | Ca_Desig_LG03              | 17.402                                       |
| Ca_Desig_SNP1187 | [A/G]       | Ca_Desig_LG03              | 17.404                                       |
| Ca_Desig_SNP1188 | [T/G]       | Ca_Desig_LG03              | 17.447                                       |
| Ca_Desig_SNP1189 | [C/G]       | Ca_Desig_LG03              | 17.620                                       |
| Ca_Desig_SNP1190 | [T/A]       | Ca_Desig_LG03              | 18.070                                       |
| Ca_Desig_SNP1191 | [A/G]       | Ca_Desig_LG03              | 18.071                                       |
| Ca_Desig_SNP1192 | [C/T]       | Ca_Desig_LG03              | 18.164                                       |
| Ca_Desig_SNP1193 | [C/G]       | Ca_Desig_LG03              | 18.172                                       |
| Ca_Desig_SNP1194 | [T/C]       | Ca_Desig_LG03              | 18.362                                       |
| Ca_Desig_SNP1195 | [T/G]       | Ca_Desig_LG03              | 18.554                                       |
| Ca_Desig_SNP1196 | [A/G]       | Ca_Desig_LG03              | 18.574                                       |
| Ca_Desig_SNP1197 | [A/T]       | Ca_Desig_LG03              | 18.641                                       |

| <b>SNP IDs</b>   | <b>SNPs</b> | <b>Linkage Group (LGs)</b> | <b>Genetic positions (cM) of mapped SNPs</b> |
|------------------|-------------|----------------------------|----------------------------------------------|
| Ca_Desig_SNP1198 | [A/G]       | Ca_Desig_LG03              | 18.685                                       |
| Ca_Desig_SNP1199 | [C/A]       | Ca_Desig_LG03              | 19.083                                       |
| Ca_Desig_SNP1200 | [A/G]       | Ca_Desig_LG03              | 19.088                                       |
| Ca_Desig_SNP1201 | [T/G]       | Ca_Desig_LG03              | 19.092                                       |
| Ca_Desig_SNP1202 | [G/A]       | Ca_Desig_LG03              | 19.132                                       |
| Ca_Desig_SNP1203 | [T/C]       | Ca_Desig_LG03              | 19.244                                       |
| Ca_Desig_SNP1204 | [G/A]       | Ca_Desig_LG03              | 19.666                                       |
| Ca_Desig_SNP1205 | [T/C]       | Ca_Desig_LG03              | 19.757                                       |
| Ca_Desig_SNP1206 | [T/G]       | Ca_Desig_LG03              | 19.906                                       |
| Ca_Desig_SNP1207 | [G/T]       | Ca_Desig_LG03              | 20.059                                       |
| Ca_Desig_SNP1208 | [C/T]       | Ca_Desig_LG03              | 20.158                                       |
| Ca_Desig_SNP1209 | [C/A]       | Ca_Desig_LG03              | 20.223                                       |
| Ca_Desig_SNP1210 | [C/A]       | Ca_Desig_LG03              | 20.732                                       |
| Ca_Desig_SNP1211 | [C/T]       | Ca_Desig_LG03              | 20.977                                       |
| Ca_Desig_SNP1212 | [G/A]       | Ca_Desig_LG03              | 21.043                                       |
| Ca_Desig_SNP1213 | [A/C]       | Ca_Desig_LG03              | 21.209                                       |
| Ca_Desig_SNP1214 | [G/A]       | Ca_Desig_LG03              | 21.351                                       |
| Ca_Desig_SNP1215 | [T/A]       | Ca_Desig_LG03              | 21.447                                       |
| Ca_Desig_SNP1216 | [G/T]       | Ca_Desig_LG03              | 21.495                                       |
| Ca_Desig_SNP1217 | [G/T]       | Ca_Desig_LG03              | 21.615                                       |
| Ca_Desig_SNP1218 | [A/G]       | Ca_Desig_LG03              | 21.832                                       |
| Ca_Desig_SNP1219 | [T/C]       | Ca_Desig_LG03              | 21.875                                       |
| Ca_Desig_SNP1220 | [T/G]       | Ca_Desig_LG03              | 21.901                                       |
| Ca_Desig_SNP1221 | [C/T]       | Ca_Desig_LG03              | 22.008                                       |
| Ca_Desig_SNP1222 | [C/A]       | Ca_Desig_LG03              | 22.022                                       |
| Ca_Desig_SNP1223 | [T/G]       | Ca_Desig_LG03              | 22.161                                       |
| Ca_Desig_SNP1224 | [G/A]       | Ca_Desig_LG03              | 22.180                                       |
| Ca_Desig_SNP1225 | [T/A]       | Ca_Desig_LG03              | 22.423                                       |
| Ca_Desig_SNP1226 | [T/G]       | Ca_Desig_LG03              | 22.536                                       |
| Ca_Desig_SNP1227 | [A/G]       | Ca_Desig_LG03              | 22.595                                       |
| Ca_Desig_SNP1228 | [A/C]       | Ca_Desig_LG03              | 22.679                                       |
| Ca_Desig_SNP1229 | [T/C]       | Ca_Desig_LG03              | 22.693                                       |
| Ca_Desig_SNP1230 | [T/C]       | Ca_Desig_LG03              | 22.728                                       |
| Ca_Desig_SNP1231 | [A/C]       | Ca_Desig_LG03              | 22.846                                       |
| Ca_Desig_SNP1232 | [A/C]       | Ca_Desig_LG03              | 22.995                                       |
| Ca_Desig_SNP1233 | [T/C]       | Ca_Desig_LG03              | 23.095                                       |
| Ca_Desig_SNP1234 | [A/G]       | Ca_Desig_LG03              | 23.231                                       |
| Ca_Desig_SNP1235 | [A/G]       | Ca_Desig_LG03              | 23.383                                       |
| Ca_Desig_SNP1236 | [C/T]       | Ca_Desig_LG03              | 23.412                                       |
| Ca_Desig_SNP1237 | [A/C]       | Ca_Desig_LG03              | 23.508                                       |
| Ca_Desig_SNP1238 | [C/T]       | Ca_Desig_LG03              | 23.565                                       |
| Ca_Desig_SNP1239 | [T/C]       | Ca_Desig_LG03              | 23.747                                       |
| Ca_Desig_SNP1240 | [T/C]       | Ca_Desig_LG03              | 23.787                                       |
| Ca_Desig_SNP1241 | [C/A]       | Ca_Desig_LG03              | 23.974                                       |
| Ca_Desig_SNP1242 | [T/C]       | Ca_Desig_LG03              | 24.024                                       |
| Ca_Desig_SNP1243 | [C/T]       | Ca_Desig_LG03              | 24.185                                       |
| Ca_Desig_SNP1244 | [T/G]       | Ca_Desig_LG03              | 24.399                                       |
| Ca_Desig_SNP1245 | [A/G]       | Ca_Desig_LG03              | 25.059                                       |

| <b>SNP IDs</b>   | <b>SNPs</b> | <b>Linkage Group (LGs)</b> | <b>Genetic positions (cM) of mapped SNPs</b> |
|------------------|-------------|----------------------------|----------------------------------------------|
| Ca_Desig_SNP1246 | [A/C]       | Ca_Desig_LG03              | 25.076                                       |
| Ca_Desig_SNP1247 | [T/C]       | Ca_Desig_LG03              | 25.216                                       |
| Ca_Desig_SNP1248 | [T/C]       | Ca_Desig_LG03              | 25.237                                       |
| Ca_Desig_SNP1249 | [T/G]       | Ca_Desig_LG03              | 25.599                                       |
| Ca_Desig_SNP1250 | [G/T]       | Ca_Desig_LG03              | 25.777                                       |
| Ca_Desig_SNP1251 | [T/C]       | Ca_Desig_LG03              | 26.358                                       |
| Ca_Desig_SNP1252 | [T/C]       | Ca_Desig_LG03              | 26.535                                       |
| Ca_Desig_SNP1253 | [T/A]       | Ca_Desig_LG03              | 26.536                                       |
| Ca_Desig_SNP1254 | [A/C]       | Ca_Desig_LG03              | 26.582                                       |
| Ca_Desig_SNP1255 | [T/G]       | Ca_Desig_LG03              | 26.736                                       |
| Ca_Desig_SNP1256 | [C/A]       | Ca_Desig_LG03              | 26.968                                       |
| Ca_Desig_SNP1257 | [G/T]       | Ca_Desig_LG03              | 27.014                                       |
| Ca_Desig_SNP1258 | [A/G]       | Ca_Desig_LG03              | 27.071                                       |
| Ca_Desig_SNP1259 | [A/T]       | Ca_Desig_LG03              | 27.143                                       |
| Ca_Desig_SNP1260 | [T/C]       | Ca_Desig_LG03              | 27.197                                       |
| Ca_Desig_SNP1261 | [A/C]       | Ca_Desig_LG03              | 27.359                                       |
| Ca_Desig_SNP1262 | [A/G]       | Ca_Desig_LG03              | 27.454                                       |
| Ca_Desig_SNP1263 | [C/A]       | Ca_Desig_LG03              | 27.480                                       |
| Ca_Desig_SNP1264 | [A/G]       | Ca_Desig_LG03              | 27.506                                       |
| Ca_Desig_SNP1265 | [A/G]       | Ca_Desig_LG03              | 27.526                                       |
| Ca_Desig_SNP1266 | [T/A]       | Ca_Desig_LG03              | 27.560                                       |
| Ca_Desig_SNP1267 | [A/G]       | Ca_Desig_LG03              | 27.583                                       |
| Ca_Desig_SNP1268 | [T/C]       | Ca_Desig_LG03              | 27.704                                       |
| Ca_Desig_SNP1269 | [C/T]       | Ca_Desig_LG03              | 27.891                                       |
| Ca_Desig_SNP1270 | [T/G]       | Ca_Desig_LG03              | 27.953                                       |
| Ca_Desig_SNP1271 | [G/A]       | Ca_Desig_LG03              | 28.006                                       |
| Ca_Desig_SNP1272 | [G/T]       | Ca_Desig_LG03              | 28.017                                       |
| Ca_Desig_SNP1273 | [A/G]       | Ca_Desig_LG03              | 28.035                                       |
| Ca_Desig_SNP1274 | [C/T]       | Ca_Desig_LG03              | 28.451                                       |
| Ca_Desig_SNP1275 | [G/T]       | Ca_Desig_LG03              | 28.511                                       |
| Ca_Desig_SNP1276 | [A/T]       | Ca_Desig_LG03              | 28.563                                       |
| Ca_Desig_SNP1277 | [A/G]       | Ca_Desig_LG03              | 28.631                                       |
| Ca_Desig_SNP1278 | [T/A]       | Ca_Desig_LG03              | 28.706                                       |
| Ca_Desig_SNP1279 | [G/A]       | Ca_Desig_LG03              | 29.153                                       |
| Ca_Desig_SNP1280 | [A/C]       | Ca_Desig_LG03              | 29.357                                       |
| Ca_Desig_SNP1281 | [A/G]       | Ca_Desig_LG03              | 29.407                                       |
| Ca_Desig_SNP1282 | [A/C]       | Ca_Desig_LG03              | 29.820                                       |
| Ca_Desig_SNP1283 | [A/G]       | Ca_Desig_LG03              | 29.869                                       |
| Ca_Desig_SNP1284 | [T/C]       | Ca_Desig_LG03              | 30.261                                       |
| Ca_Desig_SNP1285 | [T/C]       | Ca_Desig_LG03              | 30.305                                       |
| Ca_Desig_SNP1286 | [T/G]       | Ca_Desig_LG03              | 30.512                                       |
| Ca_Desig_SNP1287 | [T/G]       | Ca_Desig_LG03              | 30.670                                       |
| Ca_Desig_SNP1288 | [A/C]       | Ca_Desig_LG03              | 31.041                                       |
| Ca_Desig_SNP1289 | [T/G]       | Ca_Desig_LG03              | 31.055                                       |
| Ca_Desig_SNP1290 | [T/C]       | Ca_Desig_LG03              | 31.179                                       |
| Ca_Desig_SNP1291 | [A/G]       | Ca_Desig_LG03              | 31.261                                       |
| Ca_Desig_SNP1292 | [C/A]       | Ca_Desig_LG03              | 31.388                                       |
| Ca_Desig_SNP1293 | [A/G]       | Ca_Desig_LG03              | 31.431                                       |

| <b>SNP IDs</b>  | <b>SNPs</b> | <b>Linkage Group (LGs)</b> | <b>Genetic positions (cM) of mapped SNPs</b> |
|-----------------|-------------|----------------------------|----------------------------------------------|
| Ca_Desi_SNP1294 | [G/T]       | <i>Ca_Desi_LG03</i>        | 31.493                                       |
| Ca_Desi_SNP1295 | [G/T]       | <i>Ca_Desi_LG03</i>        | 31.509                                       |
| Ca_Desi_SNP1296 | [G/T]       | <i>Ca_Desi_LG03</i>        | 31.555                                       |
| Ca_Desi_SNP1297 | [A/C]       | <i>Ca_Desi_LG03</i>        | 31.767                                       |
| Ca_Desi_SNP1298 | [G/C]       | <i>Ca_Desi_LG03</i>        | 31.841                                       |
| Ca_Desi_SNP1299 | [G/A]       | <i>Ca_Desi_LG03</i>        | 31.878                                       |
| Ca_Desi_SNP1300 | [A/T]       | <i>Ca_Desi_LG03</i>        | 31.907                                       |
| Ca_Desi_SNP1301 | [A/G]       | <i>Ca_Desi_LG03</i>        | 31.913                                       |
| Ca_Desi_SNP1302 | [G/T]       | <i>Ca_Desi_LG03</i>        | 32.195                                       |
| Ca_Desi_SNP1303 | [T/G]       | <i>Ca_Desi_LG03</i>        | 32.207                                       |
| Ca_Desi_SNP1304 | [C/T]       | <i>Ca_Desi_LG03</i>        | 32.480                                       |
| Ca_Desi_SNP1305 | [T/C]       | <i>Ca_Desi_LG03</i>        | 32.627                                       |
| Ca_Desi_SNP1306 | [G/A]       | <i>Ca_Desi_LG03</i>        | 32.689                                       |
| Ca_Desi_SNP1307 | [A/T]       | <i>Ca_Desi_LG03</i>        | 32.857                                       |
| Ca_Desi_SNP1308 | [T/C]       | <i>Ca_Desi_LG03</i>        | 33.217                                       |
| Ca_Desi_SNP1309 | [A/G]       | <i>Ca_Desi_LG03</i>        | 33.321                                       |
| Ca_Desi_SNP1310 | [C/A]       | <i>Ca_Desi_LG03</i>        | 33.602                                       |
| Ca_Desi_SNP1311 | [T/C]       | <i>Ca_Desi_LG03</i>        | 33.626                                       |
| Ca_Desi_SNP1312 | [G/A]       | <i>Ca_Desi_LG03</i>        | 33.652                                       |
| Ca_Desi_SNP1313 | [A/G]       | <i>Ca_Desi_LG03</i>        | 33.822                                       |
| Ca_Desi_SNP1314 | [T/C]       | <i>Ca_Desi_LG03</i>        | 33.922                                       |
| Ca_Desi_SNP1315 | [C/A]       | <i>Ca_Desi_LG03</i>        | 34.070                                       |
| Ca_Desi_SNP1316 | [C/T]       | <i>Ca_Desi_LG03</i>        | 34.268                                       |
| Ca_Desi_SNP1317 | [A/C]       | <i>Ca_Desi_LG03</i>        | 34.440                                       |
| Ca_Desi_SNP1318 | [A/C]       | <i>Ca_Desi_LG03</i>        | 34.449                                       |
| Ca_Desi_SNP1319 | [C/A]       | <i>Ca_Desi_LG03</i>        | 34.458                                       |
| Ca_Desi_SNP1320 | [T/C]       | <i>Ca_Desi_LG03</i>        | 34.475                                       |
| Ca_Desi_SNP1321 | [A/G]       | <i>Ca_Desi_LG03</i>        | 34.675                                       |
| Ca_Desi_SNP1322 | [T/G]       | <i>Ca_Desi_LG03</i>        | 34.753                                       |
| Ca_Desi_SNP1323 | [T/C]       | <i>Ca_Desi_LG03</i>        | 34.897                                       |
| Ca_Desi_SNP1324 | [G/A]       | <i>Ca_Desi_LG03</i>        | 35.072                                       |
| Ca_Desi_SNP1325 | [A/G]       | <i>Ca_Desi_LG03</i>        | 35.729                                       |
| Ca_Desi_SNP1326 | [A/C]       | <i>Ca_Desi_LG03</i>        | 35.994                                       |
| Ca_Desi_SNP1327 | [C/T]       | <i>Ca_Desi_LG03</i>        | 36.007                                       |
| Ca_Desi_SNP1328 | [G/A]       | <i>Ca_Desi_LG03</i>        | 36.130                                       |
| Ca_Desi_SNP1329 | [A/C]       | <i>Ca_Desi_LG03</i>        | 36.155                                       |
| Ca_Desi_SNP1330 | [C/T]       | <i>Ca_Desi_LG03</i>        | 36.189                                       |
| Ca_Desi_SNP1331 | [T/C]       | <i>Ca_Desi_LG03</i>        | 36.211                                       |
| Ca_Desi_SNP1332 | [G/A]       | <i>Ca_Desi_LG03</i>        | 36.309                                       |
| Ca_Desi_SNP1333 | [A/G]       | <i>Ca_Desi_LG03</i>        | 36.368                                       |
| Ca_Desi_SNP1334 | [T/G]       | <i>Ca_Desi_LG03</i>        | 36.372                                       |
| Ca_Desi_SNP1335 | [T/A]       | <i>Ca_Desi_LG03</i>        | 36.510                                       |
| Ca_Desi_SNP1336 | [A/G]       | <i>Ca_Desi_LG03</i>        | 36.649                                       |
| Ca_Desi_SNP1337 | [T/C]       | <i>Ca_Desi_LG03</i>        | 36.652                                       |
| Ca_Desi_SNP1338 | [T/C]       | <i>Ca_Desi_LG03</i>        | 36.704                                       |
| Ca_Desi_SNP1339 | [T/C]       | <i>Ca_Desi_LG03</i>        | 36.959                                       |
| Ca_Desi_SNP1340 | [G/C]       | <i>Ca_Desi_LG03</i>        | 37.072                                       |
| Ca_Desi_SNP1341 | [G/T]       | <i>Ca_Desi_LG03</i>        | 37.227                                       |

| <b>SNP IDs</b>  | <b>SNPs</b> | <b>Linkage Group (LGs)</b> | <b>Genetic positions (cM) of mapped SNPs</b> |
|-----------------|-------------|----------------------------|----------------------------------------------|
| Ca_Desi_SNP1342 | [C/T]       | <i>Ca_Desi_LG03</i>        | 37.253                                       |
| Ca_Desi_SNP1343 | [A/G]       | <i>Ca_Desi_LG03</i>        | 37.311                                       |
| Ca_Desi_SNP1344 | [G/T]       | <i>Ca_Desi_LG03</i>        | 37.372                                       |
| Ca_Desi_SNP1345 | [G/A]       | <i>Ca_Desi_LG03</i>        | 37.438                                       |
| Ca_Desi_SNP1346 | [A/C]       | <i>Ca_Desi_LG03</i>        | 37.539                                       |
| Ca_Desi_SNP1347 | [T/C]       | <i>Ca_Desi_LG03</i>        | 37.574                                       |
| Ca_Desi_SNP1348 | [T/A]       | <i>Ca_Desi_LG03</i>        | 37.589                                       |
| Ca_Desi_SNP1349 | [C/T]       | <i>Ca_Desi_LG03</i>        | 37.635                                       |
| Ca_Desi_SNP1350 | [G/A]       | <i>Ca_Desi_LG03</i>        | 38.025                                       |
| Ca_Desi_SNP1351 | [A/G]       | <i>Ca_Desi_LG03</i>        | 38.235                                       |
| Ca_Desi_SNP1352 | [T/G]       | <i>Ca_Desi_LG03</i>        | 38.362                                       |
| Ca_Desi_SNP1353 | [T/C]       | <i>Ca_Desi_LG03</i>        | 38.464                                       |
| Ca_Desi_SNP1354 | [A/C]       | <i>Ca_Desi_LG03</i>        | 38.510                                       |
| Ca_Desi_SNP1355 | [T/C]       | <i>Ca_Desi_LG03</i>        | 38.673                                       |
| Ca_Desi_SNP1356 | [C/T]       | <i>Ca_Desi_LG03</i>        | 38.753                                       |
| Ca_Desi_SNP1357 | [C/A]       | <i>Ca_Desi_LG03</i>        | 38.855                                       |
| Ca_Desi_SNP1358 | [T/C]       | <i>Ca_Desi_LG03</i>        | 38.879                                       |
| Ca_Desi_SNP1359 | [A/C]       | <i>Ca_Desi_LG03</i>        | 39.084                                       |
| Ca_Desi_SNP1360 | [C/G]       | <i>Ca_Desi_LG03</i>        | 39.456                                       |
| Ca_Desi_SNP1361 | [C/T]       | <i>Ca_Desi_LG03</i>        | 39.533                                       |
| Ca_Desi_SNP1362 | [A/C]       | <i>Ca_Desi_LG03</i>        | 39.543                                       |
| Ca_Desi_SNP1363 | [A/G]       | <i>Ca_Desi_LG03</i>        | 39.849                                       |
| Ca_Desi_SNP1364 | [G/A]       | <i>Ca_Desi_LG03</i>        | 39.858                                       |
| Ca_Desi_SNP1365 | [T/G]       | <i>Ca_Desi_LG03</i>        | 40.054                                       |
| Ca_Desi_SNP1366 | [A/G]       | <i>Ca_Desi_LG03</i>        | 40.095                                       |
| Ca_Desi_SNP1367 | [T/G]       | <i>Ca_Desi_LG03</i>        | 40.204                                       |
| Ca_Desi_SNP1368 | [G/T]       | <i>Ca_Desi_LG03</i>        | 40.220                                       |
| Ca_Desi_SNP1369 | [A/C]       | <i>Ca_Desi_LG03</i>        | 40.405                                       |
| Ca_Desi_SNP1370 | [C/A]       | <i>Ca_Desi_LG03</i>        | 40.439                                       |
| Ca_Desi_SNP1371 | [A/T]       | <i>Ca_Desi_LG03</i>        | 40.454                                       |
| Ca_Desi_SNP1372 | [T/C]       | <i>Ca_Desi_LG03</i>        | 40.483                                       |
| Ca_Desi_SNP1373 | [G/T]       | <i>Ca_Desi_LG03</i>        | 40.586                                       |
| Ca_Desi_SNP1374 | [T/A]       | <i>Ca_Desi_LG03</i>        | 40.700                                       |
| Ca_Desi_SNP1375 | [G/C]       | <i>Ca_Desi_LG03</i>        | 40.765                                       |
| Ca_Desi_SNP1376 | [C/T]       | <i>Ca_Desi_LG03</i>        | 40.768                                       |
| Ca_Desi_SNP1377 | [A/C]       | <i>Ca_Desi_LG03</i>        | 40.972                                       |
| Ca_Desi_SNP1378 | [G/A]       | <i>Ca_Desi_LG03</i>        | 41.143                                       |
| Ca_Desi_SNP1379 | [C/T]       | <i>Ca_Desi_LG03</i>        | 41.169                                       |
| Ca_Desi_SNP1380 | [G/A]       | <i>Ca_Desi_LG03</i>        | 41.228                                       |
| Ca_Desi_SNP1381 | [T/G]       | <i>Ca_Desi_LG03</i>        | 41.229                                       |
| Ca_Desi_SNP1382 | [A/G]       | <i>Ca_Desi_LG03</i>        | 41.513                                       |
| Ca_Desi_SNP1383 | [G/A]       | <i>Ca_Desi_LG03</i>        | 41.589                                       |
| Ca_Desi_SNP1384 | [T/C]       | <i>Ca_Desi_LG03</i>        | 41.630                                       |
| Ca_Desi_SNP1385 | [G/A]       | <i>Ca_Desi_LG03</i>        | 41.631                                       |
| Ca_Desi_SNP1386 | [A/T]       | <i>Ca_Desi_LG03</i>        | 41.668                                       |
| Ca_Desi_SNP1387 | [C/A]       | <i>Ca_Desi_LG03</i>        | 41.698                                       |
| Ca_Desi_SNP1388 | [G/A]       | <i>Ca_Desi_LG03</i>        | 41.812                                       |
| Ca_Desi_SNP1389 | [T/C]       | <i>Ca_Desi_LG03</i>        | 41.890                                       |

| <b>SNP IDs</b>  | <b>SNPs</b> | <b>Linkage Group (LGs)</b> | <b>Genetic positions (cM) of mapped SNPs</b> |
|-----------------|-------------|----------------------------|----------------------------------------------|
| Ca_Desi_SNP1390 | [T/C]       | <i>Ca_Desi_LG03</i>        | 41.996                                       |
| Ca_Desi_SNP1391 | [G/T]       | <i>Ca_Desi_LG03</i>        | 42.003                                       |
| Ca_Desi_SNP1392 | [T/G]       | <i>Ca_Desi_LG03</i>        | 42.050                                       |
| Ca_Desi_SNP1393 | [T/C]       | <i>Ca_Desi_LG03</i>        | 42.098                                       |
| Ca_Desi_SNP1394 | [T/G]       | <i>Ca_Desi_LG03</i>        | 42.263                                       |
| Ca_Desi_SNP1395 | [A/G]       | <i>Ca_Desi_LG03</i>        | 42.332                                       |
| Ca_Desi_SNP1396 | [A/C]       | <i>Ca_Desi_LG03</i>        | 42.344                                       |
| Ca_Desi_SNP1397 | [T/G]       | <i>Ca_Desi_LG03</i>        | 42.481                                       |
| Ca_Desi_SNP1398 | [T/G]       | <i>Ca_Desi_LG03</i>        | 42.482                                       |
| Ca_Desi_SNP1399 | [T/C]       | <i>Ca_Desi_LG03</i>        | 42.568                                       |
| Ca_Desi_SNP1400 | [C/T]       | <i>Ca_Desi_LG03</i>        | 42.627                                       |
| Ca_Desi_SNP1401 | [A/G]       | <i>Ca_Desi_LG03</i>        | 42.649                                       |
| Ca_Desi_SNP1402 | [C/A]       | <i>Ca_Desi_LG03</i>        | 42.732                                       |
| Ca_Desi_SNP1403 | [A/C]       | <i>Ca_Desi_LG03</i>        | 42.863                                       |
| Ca_Desi_SNP1404 | [A/G]       | <i>Ca_Desi_LG03</i>        | 42.866                                       |
| Ca_Desi_SNP1405 | [T/G]       | <i>Ca_Desi_LG03</i>        | 42.895                                       |
| Ca_Desi_SNP1406 | [A/C]       | <i>Ca_Desi_LG03</i>        | 42.916                                       |
| Ca_Desi_SNP1407 | [A/C]       | <i>Ca_Desi_LG03</i>        | 42.959                                       |
| Ca_Desi_SNP1408 | [A/T]       | <i>Ca_Desi_LG03</i>        | 43.049                                       |
| Ca_Desi_SNP1409 | [C/T]       | <i>Ca_Desi_LG03</i>        | 43.085                                       |
| Ca_Desi_SNP1410 | [T/C]       | <i>Ca_Desi_LG03</i>        | 43.209                                       |
| Ca_Desi_SNP1411 | [C/T]       | <i>Ca_Desi_LG03</i>        | 43.213                                       |
| Ca_Desi_SNP1412 | [T/C]       | <i>Ca_Desi_LG03</i>        | 43.269                                       |
| Ca_Desi_SNP1413 | [T/G]       | <i>Ca_Desi_LG03</i>        | 43.271                                       |
| Ca_Desi_SNP1414 | [T/G]       | <i>Ca_Desi_LG03</i>        | 43.446                                       |
| Ca_Desi_SNP1415 | [C/T]       | <i>Ca_Desi_LG03</i>        | 43.506                                       |
| Ca_Desi_SNP1416 | [T/G]       | <i>Ca_Desi_LG03</i>        | 43.746                                       |
| Ca_Desi_SNP1417 | [T/C]       | <i>Ca_Desi_LG03</i>        | 43.808                                       |
| Ca_Desi_SNP1418 | [T/G]       | <i>Ca_Desi_LG03</i>        | 43.914                                       |
| Ca_Desi_SNP1419 | [A/G]       | <i>Ca_Desi_LG03</i>        | 44.024                                       |
| Ca_Desi_SNP1420 | [A/C]       | <i>Ca_Desi_LG03</i>        | 44.078                                       |
| Ca_Desi_SNP1421 | [A/G]       | <i>Ca_Desi_LG03</i>        | 44.113                                       |
| Ca_Desi_SNP1422 | [T/C]       | <i>Ca_Desi_LG03</i>        | 44.121                                       |
| Ca_Desi_SNP1423 | [T/C]       | <i>Ca_Desi_LG03</i>        | 44.246                                       |
| Ca_Desi_SNP1424 | [G/A]       | <i>Ca_Desi_LG03</i>        | 44.399                                       |
| Ca_Desi_SNP1425 | [C/A]       | <i>Ca_Desi_LG03</i>        | 44.496                                       |
| Ca_Desi_SNP1426 | [A/G]       | <i>Ca_Desi_LG03</i>        | 44.721                                       |
| Ca_Desi_SNP1427 | [A/G]       | <i>Ca_Desi_LG03</i>        | 44.896                                       |
| Ca_Desi_SNP1428 | [C/A]       | <i>Ca_Desi_LG03</i>        | 45.030                                       |
| Ca_Desi_SNP1429 | [A/C]       | <i>Ca_Desi_LG03</i>        | 45.057                                       |
| Ca_Desi_SNP1430 | [T/C]       | <i>Ca_Desi_LG03</i>        | 45.090                                       |
| Ca_Desi_SNP1431 | [G/C]       | <i>Ca_Desi_LG03</i>        | 45.485                                       |
| Ca_Desi_SNP1432 | [T/C]       | <i>Ca_Desi_LG03</i>        | 45.553                                       |
| Ca_Desi_SNP1433 | [G/A]       | <i>Ca_Desi_LG03</i>        | 45.647                                       |
| Ca_Desi_SNP1434 | [T/C]       | <i>Ca_Desi_LG03</i>        | 45.678                                       |
| Ca_Desi_SNP1435 | [A/C]       | <i>Ca_Desi_LG03</i>        | 45.745                                       |
| Ca_Desi_SNP1436 | [T/C]       | <i>Ca_Desi_LG03</i>        | 45.829                                       |
| Ca_Desi_SNP1437 | [T/C]       | <i>Ca_Desi_LG03</i>        | 45.839                                       |

| <b>SNP IDs</b>   | <b>SNPs</b> | <b>Linkage Group (LGs)</b> | <b>Genetic positions (cM) of mapped SNPs</b> |
|------------------|-------------|----------------------------|----------------------------------------------|
| Ca_Desig_SNP1438 | [A/G]       | Ca_Desig_LG03              | 45.973                                       |
| Ca_Desig_SNP1439 | [T/G]       | Ca_Desig_LG03              | 46.132                                       |
| Ca_Desig_SNP1440 | [T/C]       | Ca_Desig_LG03              | 46.159                                       |
| Ca_Desig_SNP1441 | [C/A]       | Ca_Desig_LG03              | 46.171                                       |
| Ca_Desig_SNP1442 | [T/C]       | Ca_Desig_LG03              | 46.173                                       |
| Ca_Desig_SNP1443 | [A/C]       | Ca_Desig_LG03              | 46.466                                       |
| Ca_Desig_SNP1444 | [T/C]       | Ca_Desig_LG03              | 46.508                                       |
| Ca_Desig_SNP1445 | [A/C]       | Ca_Desig_LG03              | 46.529                                       |
| Ca_Desig_SNP1446 | [A/G]       | Ca_Desig_LG03              | 47.027                                       |
| Ca_Desig_SNP1447 | [T/C]       | Ca_Desig_LG03              | 47.074                                       |
| Ca_Desig_SNP1448 | [A/G]       | Ca_Desig_LG03              | 47.227                                       |
| Ca_Desig_SNP1449 | [T/G]       | Ca_Desig_LG03              | 47.350                                       |
| Ca_Desig_SNP1450 | [A/G]       | Ca_Desig_LG03              | 47.394                                       |
| Ca_Desig_SNP1451 | [T/C]       | Ca_Desig_LG03              | 47.687                                       |
| Ca_Desig_SNP1452 | [G/A]       | Ca_Desig_LG03              | 47.992                                       |
| Ca_Desig_SNP1453 | [A/G]       | Ca_Desig_LG03              | 48.006                                       |
| Ca_Desig_SNP1454 | [A/G]       | Ca_Desig_LG03              | 48.027                                       |
| Ca_Desig_SNP1455 | [A/C]       | Ca_Desig_LG03              | 48.038                                       |
| Ca_Desig_SNP1456 | [T/C]       | Ca_Desig_LG03              | 48.114                                       |
| Ca_Desig_SNP1457 | [A/G]       | Ca_Desig_LG03              | 48.302                                       |
| Ca_Desig_SNP1458 | [T/G]       | Ca_Desig_LG03              | 48.313                                       |
| Ca_Desig_SNP1459 | [C/T]       | Ca_Desig_LG03              | 48.353                                       |
| Ca_Desig_SNP1460 | [A/T]       | Ca_Desig_LG03              | 48.583                                       |
| Ca_Desig_SNP1461 | [C/T]       | Ca_Desig_LG03              | 48.923                                       |
| Ca_Desig_SNP1462 | [A/C]       | Ca_Desig_LG03              | 49.068                                       |
| Ca_Desig_SNP1463 | [A/G]       | Ca_Desig_LG03              | 49.174                                       |
| Ca_Desig_SNP1464 | [C/T]       | Ca_Desig_LG03              | 49.373                                       |
| Ca_Desig_SNP1465 | [T/C]       | Ca_Desig_LG03              | 49.404                                       |
| Ca_Desig_SNP1466 | [G/T]       | Ca_Desig_LG03              | 49.717                                       |
| Ca_Desig_SNP1467 | [T/C]       | Ca_Desig_LG03              | 49.973                                       |
| Ca_Desig_SNP1468 | [T/C]       | Ca_Desig_LG03              | 50.032                                       |
| Ca_Desig_SNP1469 | [G/C]       | Ca_Desig_LG03              | 50.155                                       |
| Ca_Desig_SNP1470 | [G/T]       | Ca_Desig_LG03              | 50.176                                       |
| Ca_Desig_SNP1471 | [T/C]       | Ca_Desig_LG03              | 50.212                                       |
| Ca_Desig_SNP1472 | [G/A]       | Ca_Desig_LG03              | 50.290                                       |
| Ca_Desig_SNP1473 | [G/A]       | Ca_Desig_LG03              | 50.387                                       |
| Ca_Desig_SNP1474 | [A/C]       | Ca_Desig_LG03              | 50.445                                       |
| Ca_Desig_SNP1475 | [A/G]       | Ca_Desig_LG03              | 50.489                                       |
| Ca_Desig_SNP1476 | [T/G]       | Ca_Desig_LG03              | 50.548                                       |
| Ca_Desig_SNP1477 | [A/T]       | Ca_Desig_LG03              | 50.660                                       |
| Ca_Desig_SNP1478 | [C/T]       | Ca_Desig_LG03              | 50.771                                       |
| Ca_Desig_SNP1479 | [G/A]       | Ca_Desig_LG03              | 50.792                                       |
| Ca_Desig_SNP1480 | [A/C]       | Ca_Desig_LG03              | 50.832                                       |
| Ca_Desig_SNP1481 | [T/C]       | Ca_Desig_LG03              | 50.983                                       |
| Ca_Desig_SNP1482 | [G/T]       | Ca_Desig_LG03              | 51.327                                       |
| Ca_Desig_SNP1483 | [C/T]       | Ca_Desig_LG03              | 51.953                                       |
| Ca_Desig_SNP1484 | [T/C]       | Ca_Desig_LG03              | 52.068                                       |
| Ca_Desig_SNP1485 | [T/C]       | Ca_Desig_LG03              | 52.177                                       |



| <b>SNP IDs</b>   | <b>SNPs</b> | <b>Linkage Group (LGs)</b> | <b>Genetic positions (cM) of mapped SNPs</b> |
|------------------|-------------|----------------------------|----------------------------------------------|
| Ca_Desig_SNP1486 | [A/G]       | Ca_Desig_LG03              | 52.290                                       |
| Ca_Desig_SNP1487 | [A/T]       | Ca_Desig_LG03              | 52.354                                       |
| Ca_Desig_SNP1488 | [T/C]       | Ca_Desig_LG03              | 52.423                                       |
| Ca_Desig_SNP1489 | [A/C]       | Ca_Desig_LG03              | 52.566                                       |
| Ca_Desig_SNP1490 | [G/T]       | Ca_Desig_LG03              | 52.585                                       |
| Ca_Desig_SNP1491 | [T/A]       | Ca_Desig_LG03              | 52.596                                       |
| Ca_Desig_SNP1492 | [G/A]       | Ca_Desig_LG03              | 53.010                                       |
| Ca_Desig_SNP1493 | [A/T]       | Ca_Desig_LG03              | 53.360                                       |
| Ca_Desig_SNP1494 | [T/A]       | Ca_Desig_LG03              | 53.525                                       |
| Ca_Desig_SNP1495 | [T/C]       | Ca_Desig_LG03              | 53.594                                       |
| Ca_Desig_SNP1496 | [A/C]       | Ca_Desig_LG03              | 53.732                                       |
| Ca_Desig_SNP1497 | [A/G]       | Ca_Desig_LG03              | 53.935                                       |
| Ca_Desig_SNP1498 | [C/A]       | Ca_Desig_LG03              | 54.051                                       |
| Ca_Desig_SNP1499 | [G/T]       | Ca_Desig_LG03              | 54.102                                       |
| Ca_Desig_SNP1500 | [A/C]       | Ca_Desig_LG03              | 54.103                                       |
| Ca_Desig_SNP1501 | [T/G]       | Ca_Desig_LG03              | 54.537                                       |
| Ca_Desig_SNP1502 | [G/A]       | Ca_Desig_LG03              | 54.788                                       |
| Ca_Desig_SNP1503 | [C/A]       | Ca_Desig_LG03              | 54.881                                       |
| Ca_Desig_SNP1504 | [A/C]       | Ca_Desig_LG03              | 54.888                                       |
| Ca_Desig_SNP1505 | [T/C]       | Ca_Desig_LG03              | 54.947                                       |
| Ca_Desig_SNP1506 | [G/T]       | Ca_Desig_LG03              | 54.973                                       |
| Ca_Desig_SNP1507 | [C/A]       | Ca_Desig_LG03              | 55.052                                       |
| Ca_Desig_SNP1508 | [A/C]       | Ca_Desig_LG03              | 55.098                                       |
| Ca_Desig_SNP1509 | [G/T]       | Ca_Desig_LG03              | 55.323                                       |
| Ca_Desig_SNP1510 | [T/G]       | Ca_Desig_LG03              | 55.363                                       |
| Ca_Desig_SNP1511 | [G/A]       | Ca_Desig_LG03              | 55.413                                       |
| Ca_Desig_SNP1512 | [A/C]       | Ca_Desig_LG03              | 55.471                                       |
| Ca_Desig_SNP1513 | [T/G]       | Ca_Desig_LG03              | 55.477                                       |
| Ca_Desig_SNP1514 | [A/C]       | Ca_Desig_LG03              | 55.480                                       |
| Ca_Desig_SNP1515 | [C/T]       | Ca_Desig_LG03              | 55.542                                       |
| Ca_Desig_SNP1516 | [T/G]       | Ca_Desig_LG03              | 55.619                                       |
| Ca_Desig_SNP1517 | [T/G]       | Ca_Desig_LG03              | 55.793                                       |
| Ca_Desig_SNP1518 | [G/T]       | Ca_Desig_LG03              | 56.118                                       |
| Ca_Desig_SNP1519 | [A/G]       | Ca_Desig_LG03              | 56.131                                       |
| Ca_Desig_SNP1520 | [A/G]       | Ca_Desig_LG03              | 56.159                                       |
| Ca_Desig_SNP1521 | [C/A]       | Ca_Desig_LG03              | 56.212                                       |
| Ca_Desig_SNP1522 | [G/A]       | Ca_Desig_LG03              | 56.306                                       |
| Ca_Desig_SNP1523 | [G/A]       | Ca_Desig_LG03              | 56.331                                       |
| Ca_Desig_SNP1524 | [C/A]       | Ca_Desig_LG03              | 56.445                                       |
| Ca_Desig_SNP1525 | [T/G]       | Ca_Desig_LG03              | 56.488                                       |
| Ca_Desig_SNP1526 | [A/C]       | Ca_Desig_LG03              | 56.674                                       |
| Ca_Desig_SNP1527 | [A/G]       | Ca_Desig_LG03              | 56.919                                       |
| Ca_Desig_SNP1528 | [G/A]       | Ca_Desig_LG03              | 57.030                                       |
| Ca_Desig_SNP1529 | [A/G]       | Ca_Desig_LG03              | 57.287                                       |
| Ca_Desig_SNP1530 | [C/G]       | Ca_Desig_LG03              | 57.291                                       |
| Ca_Desig_SNP1531 | [G/T]       | Ca_Desig_LG03              | 57.452                                       |
| Ca_Desig_SNP1532 | [A/T]       | Ca_Desig_LG03              | 57.528                                       |
| Ca_Desig_SNP1533 | [A/G]       | Ca_Desig_LG03              | 57.560                                       |

| <b>SNP IDs</b>   | <b>SNPs</b> | <b>Linkage Group (LGs)</b> | <b>Genetic positions (cM) of mapped SNPs</b> |
|------------------|-------------|----------------------------|----------------------------------------------|
| Ca_Desig_SNP1534 | [A/C]       | Ca_Desig_LG03              | 57.583                                       |
| Ca_Desig_SNP1535 | [G/T]       | Ca_Desig_LG03              | 57.654                                       |
| Ca_Desig_SNP1536 | [T/C]       | Ca_Desig_LG03              | 57.692                                       |
| Ca_Desig_SNP1537 | [G/T]       | Ca_Desig_LG03              | 57.702                                       |
| Ca_Desig_SNP1538 | [T/A]       | Ca_Desig_LG03              | 57.753                                       |
| Ca_Desig_SNP1539 | [G/A]       | Ca_Desig_LG03              | 57.766                                       |
| Ca_Desig_SNP1540 | [A/C]       | Ca_Desig_LG03              | 57.846                                       |
| Ca_Desig_SNP1541 | [A/C]       | Ca_Desig_LG03              | 57.924                                       |
| Ca_Desig_SNP1542 | [G/T]       | Ca_Desig_LG03              | 57.954                                       |
| Ca_Desig_SNP1543 | [T/C]       | Ca_Desig_LG03              | 57.975                                       |
| Ca_Desig_SNP1544 | [A/T]       | Ca_Desig_LG03              | 58.198                                       |
| Ca_Desig_SNP1545 | [C/T]       | Ca_Desig_LG03              | 58.212                                       |
| Ca_Desig_SNP1546 | [A/C]       | Ca_Desig_LG03              | 58.235                                       |
| Ca_Desig_SNP1547 | [A/G]       | Ca_Desig_LG03              | 58.450                                       |
| Ca_Desig_SNP1548 | [C/A]       | Ca_Desig_LG03              | 58.561                                       |
| Ca_Desig_SNP1549 | [C/A]       | Ca_Desig_LG03              | 58.674                                       |
| Ca_Desig_SNP1550 | [T/C]       | Ca_Desig_LG03              | 58.683                                       |
| Ca_Desig_SNP1551 | [T/C]       | Ca_Desig_LG03              | 58.690                                       |
| Ca_Desig_SNP1552 | [T/C]       | Ca_Desig_LG03              | 58.788                                       |
| Ca_Desig_SNP1553 | [A/C]       | Ca_Desig_LG03              | 58.856                                       |
| Ca_Desig_SNP1554 | [C/G]       | Ca_Desig_LG03              | 58.871                                       |
| Ca_Desig_SNP1555 | [T/A]       | Ca_Desig_LG03              | 59.015                                       |
| Ca_Desig_SNP1556 | [G/C]       | Ca_Desig_LG03              | 59.069                                       |
| Ca_Desig_SNP1557 | [T/G]       | Ca_Desig_LG03              | 59.354                                       |
| Ca_Desig_SNP1558 | [T/C]       | Ca_Desig_LG03              | 59.365                                       |
| Ca_Desig_SNP1559 | [G/A]       | Ca_Desig_LG03              | 59.415                                       |
| Ca_Desig_SNP1560 | [G/T]       | Ca_Desig_LG03              | 59.451                                       |
| Ca_Desig_SNP1561 | [T/C]       | Ca_Desig_LG03              | 59.489                                       |
| Ca_Desig_SNP1562 | [A/G]       | Ca_Desig_LG03              | 59.590                                       |
| Ca_Desig_SNP1563 | [A/G]       | Ca_Desig_LG03              | 59.714                                       |
| Ca_Desig_SNP1564 | [A/G]       | Ca_Desig_LG03              | 60.360                                       |
| Ca_Desig_SNP1565 | [T/C]       | Ca_Desig_LG03              | 60.412                                       |
| Ca_Desig_SNP1566 | [T/C]       | Ca_Desig_LG03              | 60.818                                       |
| Ca_Desig_SNP1567 | [A/G]       | Ca_Desig_LG03              | 61.023                                       |
| Ca_Desig_SNP1568 | [A/C]       | Ca_Desig_LG03              | 61.121                                       |
| Ca_Desig_SNP1569 | [A/C]       | Ca_Desig_LG03              | 61.147                                       |
| Ca_Desig_SNP1570 | [T/G]       | Ca_Desig_LG03              | 61.500                                       |
| Ca_Desig_SNP1571 | [T/C]       | Ca_Desig_LG03              | 61.561                                       |
| Ca_Desig_SNP1572 | [T/C]       | Ca_Desig_LG03              | 61.599                                       |
| Ca_Desig_SNP1573 | [A/G]       | Ca_Desig_LG03              | 61.777                                       |
| Ca_Desig_SNP1574 | [G/C]       | Ca_Desig_LG03              | 61.824                                       |
| Ca_Desig_SNP1575 | [C/T]       | Ca_Desig_LG03              | 61.835                                       |
| Ca_Desig_SNP1576 | [G/A]       | Ca_Desig_LG03              | 62.021                                       |
| Ca_Desig_SNP1577 | [T/A]       | Ca_Desig_LG03              | 62.031                                       |
| Ca_Desig_SNP1578 | [C/T]       | Ca_Desig_LG03              | 62.305                                       |
| Ca_Desig_SNP1579 | [G/C]       | Ca_Desig_LG03              | 62.368                                       |
| Ca_Desig_SNP1580 | [T/C]       | Ca_Desig_LG03              | 62.465                                       |
| Ca_Desig_SNP1581 | [T/G]       | Ca_Desig_LG03              | 62.509                                       |

| <b>SNP IDs</b>  | <b>SNPs</b> | <b>Linkage Group (LGs)</b> | <b>Genetic positions (cM) of mapped SNPs</b> |
|-----------------|-------------|----------------------------|----------------------------------------------|
| Ca_Desi_SNP1582 | [A/G]       | <i>Ca_Desi_LG03</i>        | 62.612                                       |
| Ca_Desi_SNP1583 | [C/T]       | <i>Ca_Desi_LG03</i>        | 62.744                                       |
| Ca_Desi_SNP1584 | [T/G]       | <i>Ca_Desi_LG03</i>        | 62.995                                       |
| Ca_Desi_SNP1585 | [A/G]       | <i>Ca_Desi_LG03</i>        | 63.033                                       |
| Ca_Desi_SNP1586 | [T/G]       | <i>Ca_Desi_LG03</i>        | 63.297                                       |
| Ca_Desi_SNP1587 | [T/A]       | <i>Ca_Desi_LG03</i>        | 63.334                                       |
| Ca_Desi_SNP1588 | [T/C]       | <i>Ca_Desi_LG03</i>        | 63.485                                       |
| Ca_Desi_SNP1589 | [C/T]       | <i>Ca_Desi_LG03</i>        | 63.568                                       |
| Ca_Desi_SNP1590 | [A/C]       | <i>Ca_Desi_LG03</i>        | 63.742                                       |
| Ca_Desi_SNP1591 | [G/T]       | <i>Ca_Desi_LG03</i>        | 63.918                                       |
| Ca_Desi_SNP1592 | [A/G]       | <i>Ca_Desi_LG03</i>        | 63.973                                       |
| Ca_Desi_SNP1593 | [C/A]       | <i>Ca_Desi_LG03</i>        | 64.281                                       |
| Ca_Desi_SNP1594 | [A/G]       | <i>Ca_Desi_LG03</i>        | 64.373                                       |
| Ca_Desi_SNP1595 | [A/C]       | <i>Ca_Desi_LG03</i>        | 64.420                                       |
| Ca_Desi_SNP1596 | [A/C]       | <i>Ca_Desi_LG03</i>        | 64.660                                       |
| Ca_Desi_SNP1597 | [A/G]       | <i>Ca_Desi_LG03</i>        | 64.661                                       |
| Ca_Desi_SNP1598 | [A/G]       | <i>Ca_Desi_LG03</i>        | 64.699                                       |
| Ca_Desi_SNP1599 | [T/C]       | <i>Ca_Desi_LG03</i>        | 64.775                                       |
| Ca_Desi_SNP1600 | [A/G]       | <i>Ca_Desi_LG03</i>        | 64.911                                       |
| Ca_Desi_SNP1601 | [A/C]       | <i>Ca_Desi_LG03</i>        | 65.284                                       |
| Ca_Desi_SNP1602 | [A/C]       | <i>Ca_Desi_LG03</i>        | 65.354                                       |
| Ca_Desi_SNP1603 | [A/T]       | <i>Ca_Desi_LG03</i>        | 65.588                                       |
| Ca_Desi_SNP1604 | [C/T]       | <i>Ca_Desi_LG03</i>        | 65.605                                       |
| Ca_Desi_SNP1605 | [A/T]       | <i>Ca_Desi_LG03</i>        | 65.686                                       |
| Ca_Desi_SNP1606 | [A/G]       | <i>Ca_Desi_LG03</i>        | 65.904                                       |
| Ca_Desi_SNP1607 | [G/T]       | <i>Ca_Desi_LG03</i>        | 66.208                                       |
| Ca_Desi_SNP1608 | [A/G]       | <i>Ca_Desi_LG03</i>        | 66.345                                       |
| Ca_Desi_SNP1609 | [T/A]       | <i>Ca_Desi_LG03</i>        | 66.447                                       |
| Ca_Desi_SNP1610 | [G/C]       | <i>Ca_Desi_LG03</i>        | 66.557                                       |
| Ca_Desi_SNP1611 | [A/G]       | <i>Ca_Desi_LG03</i>        | 67.020                                       |
| Ca_Desi_SNP1612 | [T/C]       | <i>Ca_Desi_LG03</i>        | 67.204                                       |
| Ca_Desi_SNP1613 | [T/C]       | <i>Ca_Desi_LG03</i>        | 67.232                                       |
| Ca_Desi_SNP1614 | [A/C]       | <i>Ca_Desi_LG03</i>        | 67.278                                       |
| Ca_Desi_SNP1615 | [A/G]       | <i>Ca_Desi_LG03</i>        | 67.423                                       |
| Ca_Desi_SNP1616 | [C/G]       | <i>Ca_Desi_LG03</i>        | 67.755                                       |
| Ca_Desi_SNP1617 | [A/C]       | <i>Ca_Desi_LG03</i>        | 67.801                                       |
| Ca_Desi_SNP1618 | [A/G]       | <i>Ca_Desi_LG03</i>        | 67.861                                       |
| Ca_Desi_SNP1619 | [G/A]       | <i>Ca_Desi_LG03</i>        | 67.867                                       |
| Ca_Desi_SNP1620 | [A/C]       | <i>Ca_Desi_LG03</i>        | 67.958                                       |
| Ca_Desi_SNP1621 | [T/C]       | <i>Ca_Desi_LG03</i>        | 68.079                                       |
| Ca_Desi_SNP1622 | [C/T]       | <i>Ca_Desi_LG03</i>        | 68.142                                       |
| Ca_Desi_SNP1623 | [G/T]       | <i>Ca_Desi_LG03</i>        | 68.192                                       |
| Ca_Desi_SNP1624 | [G/A]       | <i>Ca_Desi_LG03</i>        | 68.300                                       |
| Ca_Desi_SNP1625 | [T/C]       | <i>Ca_Desi_LG03</i>        | 68.425                                       |
| Ca_Desi_SNP1626 | [T/C]       | <i>Ca_Desi_LG03</i>        | 69.023                                       |
| Ca_Desi_SNP1627 | [C/T]       | <i>Ca_Desi_LG03</i>        | 69.074                                       |
| Ca_Desi_SNP1628 | [C/T]       | <i>Ca_Desi_LG03</i>        | 69.175                                       |
| Ca_Desi_SNP1629 | [G/A]       | <i>Ca_Desi_LG03</i>        | 69.180                                       |

| <b>SNP IDs</b>  | <b>SNPs</b> | <b>Linkage Group (LGs)</b> | <b>Genetic positions (cM) of mapped SNPs</b> |
|-----------------|-------------|----------------------------|----------------------------------------------|
| Ca_Desi_SNP1630 | [A/C]       | <i>Ca_Desi_LG03</i>        | 69.301                                       |
| Ca_Desi_SNP1631 | [T/G]       | <i>Ca_Desi_LG03</i>        | 69.564                                       |
| Ca_Desi_SNP1632 | [T/C]       | <i>Ca_Desi_LG03</i>        | 69.583                                       |
| Ca_Desi_SNP1633 | [T/A]       | <i>Ca_Desi_LG03</i>        | 69.685                                       |
| Ca_Desi_SNP1634 | [G/A]       | <i>Ca_Desi_LG03</i>        | 70.062                                       |
| Ca_Desi_SNP1635 | [G/A]       | <i>Ca_Desi_LG03</i>        | 70.088                                       |
| Ca_Desi_SNP1636 | [G/A]       | <i>Ca_Desi_LG03</i>        | 70.212                                       |
| Ca_Desi_SNP1637 | [C/T]       | <i>Ca_Desi_LG03</i>        | 71.001                                       |
| Ca_Desi_SNP1638 | [A/G]       | <i>Ca_Desi_LG03</i>        | 71.116                                       |
| Ca_Desi_SNP1639 | [T/C]       | <i>Ca_Desi_LG03</i>        | 71.229                                       |
| Ca_Desi_SNP1640 | [C/G]       | <i>Ca_Desi_LG03</i>        | 71.266                                       |
| Ca_Desi_SNP1641 | [A/G]       | <i>Ca_Desi_LG03</i>        | 71.664                                       |
| Ca_Desi_SNP1642 | [T/C]       | <i>Ca_Desi_LG03</i>        | 71.815                                       |
| Ca_Desi_SNP1643 | [A/G]       | <i>Ca_Desi_LG03</i>        | 71.971                                       |
| Ca_Desi_SNP1644 | [A/G]       | <i>Ca_Desi_LG03</i>        | 72.091                                       |
| Ca_Desi_SNP1645 | [T/C]       | <i>Ca_Desi_LG03</i>        | 72.129                                       |
| Ca_Desi_SNP1646 | [A/C]       | <i>Ca_Desi_LG03</i>        | 72.228                                       |
| Ca_Desi_SNP1647 | [G/C]       | <i>Ca_Desi_LG03</i>        | 72.445                                       |
| Ca_Desi_SNP1648 | [C/G]       | <i>Ca_Desi_LG03</i>        | 72.758                                       |
| Ca_Desi_SNP1649 | [T/G]       | <i>Ca_Desi_LG03</i>        | 72.966                                       |
| Ca_Desi_SNP1650 | [T/C]       | <i>Ca_Desi_LG03</i>        | 73.031                                       |
| Ca_Desi_SNP1651 | [C/A]       | <i>Ca_Desi_LG03</i>        | 73.304                                       |
| Ca_Desi_SNP1652 | [T/G]       | <i>Ca_Desi_LG03</i>        | 73.662                                       |
| Ca_Desi_SNP1653 | [T/A]       | <i>Ca_Desi_LG03</i>        | 73.879                                       |
| Ca_Desi_SNP1654 | [T/C]       | <i>Ca_Desi_LG03</i>        | 74.345                                       |
| Ca_Desi_SNP1655 | [A/G]       | <i>Ca_Desi_LG03</i>        | 74.424                                       |
| Ca_Desi_SNP1656 | [G/T]       | <i>Ca_Desi_LG03</i>        | 74.794                                       |
| Ca_Desi_SNP1657 | [G/A]       | <i>Ca_Desi_LG03</i>        | 75.763                                       |
| Ca_Desi_SNP1658 | [A/C]       | <i>Ca_Desi_LG03</i>        | 76.174                                       |
| Ca_Desi_SNP1659 | [G/A]       | <i>Ca_Desi_LG03</i>        | 76.280                                       |
| Ca_Desi_SNP1660 | [T/C]       | <i>Ca_Desi_LG03</i>        | 76.350                                       |
| Ca_Desi_SNP1661 | [T/G]       | <i>Ca_Desi_LG03</i>        | 76.412                                       |
| Ca_Desi_SNP1662 | [G/C]       | <i>Ca_Desi_LG03</i>        | 76.463                                       |
| Ca_Desi_SNP1663 | [G/T]       | <i>Ca_Desi_LG03</i>        | 76.500                                       |
| Ca_Desi_SNP1664 | [T/A]       | <i>Ca_Desi_LG03</i>        | 76.699                                       |
| Ca_Desi_SNP1665 | [T/C]       | <i>Ca_Desi_LG03</i>        | 76.872                                       |
| Ca_Desi_SNP1666 | [T/C]       | <i>Ca_Desi_LG03</i>        | 76.979                                       |
| Ca_Desi_SNP1667 | [C/A]       | <i>Ca_Desi_LG03</i>        | 77.398                                       |
| Ca_Desi_SNP1668 | [A/G]       | <i>Ca_Desi_LG03</i>        | 77.559                                       |
| Ca_Desi_SNP1669 | [T/A]       | <i>Ca_Desi_LG03</i>        | 77.765                                       |
| Ca_Desi_SNP1670 | [G/C]       | <i>Ca_Desi_LG03</i>        | 77.810                                       |
| Ca_Desi_SNP1671 | [C/T]       | <i>Ca_Desi_LG03</i>        | 78.486                                       |
| Ca_Desi_SNP1672 | [G/A]       | <i>Ca_Desi_LG03</i>        | 78.511                                       |
| Ca_Desi_SNP1673 | [A/G]       | <i>Ca_Desi_LG03</i>        | 78.524                                       |
| Ca_Desi_SNP1674 | [A/G]       | <i>Ca_Desi_LG03</i>        | 78.706                                       |
| Ca_Desi_SNP1675 | [A/G]       | <i>Ca_Desi_LG03</i>        | 78.712                                       |
| Ca_Desi_SNP1676 | [C/A]       | <i>Ca_Desi_LG03</i>        | 78.728                                       |
| Ca_Desi_SNP1677 | [C/G]       | <i>Ca_Desi_LG03</i>        | 78.750                                       |

| <b>SNP IDs</b>   | <b>SNPs</b> | <b>Linkage Group (LGs)</b> | <b>Genetic positions (cM) of mapped SNPs</b> |
|------------------|-------------|----------------------------|----------------------------------------------|
| Ca_Desig_SNP1678 | [A/C]       | Ca_Desig_LG03              | 78.982                                       |
| Ca_Desig_SNP1679 | [A/C]       | Ca_Desig_LG03              | 78.988                                       |
| Ca_Desig_SNP1680 | [C/T]       | Ca_Desig_LG03              | 79.005                                       |
| Ca_Desig_SNP1681 | [C/A]       | Ca_Desig_LG03              | 79.095                                       |
| Ca_Desig_SNP1682 | [C/A]       | Ca_Desig_LG03              | 79.229                                       |
| Ca_Desig_SNP1683 | [T/C]       | Ca_Desig_LG03              | 79.426                                       |
| Ca_Desig_SNP1684 | [A/G]       | Ca_Desig_LG03              | 79.504                                       |
| Ca_Desig_SNP1685 | [C/T]       | Ca_Desig_LG03              | 79.709                                       |
| Ca_Desig_SNP1686 | [A/G]       | Ca_Desig_LG03              | 79.757                                       |
| Ca_Desig_SNP1687 | [A/G]       | Ca_Desig_LG03              | 79.762                                       |
| Ca_Desig_SNP1688 | [C/T]       | Ca_Desig_LG03              | 80.216                                       |
| Ca_Desig_SNP1689 | [G/A]       | Ca_Desig_LG03              | 80.490                                       |
| Ca_Desig_SNP1690 | [A/G]       | Ca_Desig_LG03              | 80.779                                       |
| Ca_Desig_SNP1691 | [A/G]       | Ca_Desig_LG03              | 81.295                                       |
| Ca_Desig_SNP1692 | [A/G]       | Ca_Desig_LG03              | 81.347                                       |
| Ca_Desig_SNP1693 | [T/C]       | Ca_Desig_LG03              | 81.595                                       |
| Ca_Desig_SNP1694 | [C/T]       | Ca_Desig_LG03              | 81.619                                       |
| Ca_Desig_SNP1695 | [A/G]       | Ca_Desig_LG03              | 81.783                                       |
| Ca_Desig_SNP1696 | [C/T]       | Ca_Desig_LG03              | 81.788                                       |
| Ca_Desig_SNP1697 | [G/T]       | Ca_Desig_LG03              | 81.991                                       |
| Ca_Desig_SNP1698 | [A/G]       | Ca_Desig_LG03              | 82.001                                       |
| Ca_Desig_SNP1699 | [T/A]       | Ca_Desig_LG03              | 82.099                                       |
| Ca_Desig_SNP1700 | [C/T]       | Ca_Desig_LG03              | 82.496                                       |
| Ca_Desig_SNP1701 | [C/T]       | Ca_Desig_LG03              | 82.532                                       |
| Ca_Desig_SNP1702 | [T/C]       | Ca_Desig_LG03              | 83.322                                       |
| Ca_Desig_SNP1703 | [A/T]       | Ca_Desig_LG03              | 83.663                                       |
| Ca_Desig_SNP1704 | [T/A]       | Ca_Desig_LG03              | 83.986                                       |
| Ca_Desig_SNP1705 | [G/C]       | Ca_Desig_LG03              | 84.689                                       |
| Ca_Desig_SNP1706 | [A/G]       | Ca_Desig_LG03              | 84.731                                       |
| Ca_Desig_SNP1707 | [T/C]       | Ca_Desig_LG03              | 85.071                                       |
| Ca_Desig_SNP1708 | [C/T]       | Ca_Desig_LG03              | 85.779                                       |
| Ca_Desig_SNP1709 | [C/T]       | Ca_Desig_LG03              | 85.993                                       |
| Ca_Desig_SNP1710 | [A/G]       | Ca_Desig_LG04              | 0.000                                        |
| Ca_Desig_SNP1711 | [T/C]       | Ca_Desig_LG04              | 10.181                                       |
| Ca_Desig_SNP1712 | [G/C]       | Ca_Desig_LG04              | 10.511                                       |
| Ca_Desig_SNP1713 | [T/C]       | Ca_Desig_LG04              | 10.735                                       |
| Ca_Desig_SNP1714 | [A/T]       | Ca_Desig_LG04              | 11.298                                       |
| Ca_Desig_SNP1715 | [G/T]       | Ca_Desig_LG04              | 12.115                                       |
| Ca_Desig_SNP1716 | [T/A]       | Ca_Desig_LG04              | 12.456                                       |
| Ca_Desig_SNP1717 | [C/A]       | Ca_Desig_LG04              | 13.273                                       |
| Ca_Desig_SNP1718 | [T/C]       | Ca_Desig_LG04              | 13.702                                       |
| Ca_Desig_SNP1719 | [T/C]       | Ca_Desig_LG04              | 14.874                                       |
| Ca_Desig_SNP1720 | [T/C]       | Ca_Desig_LG04              | 15.130                                       |
| Ca_Desig_SNP1721 | [G/T]       | Ca_Desig_LG04              | 15.983                                       |
| Ca_Desig_SNP1722 | [G/A]       | Ca_Desig_LG04              | 16.006                                       |
| Ca_Desig_SNP1723 | [G/T]       | Ca_Desig_LG04              | 16.074                                       |
| Ca_Desig_SNP1724 | [A/C]       | Ca_Desig_LG04              | 16.304                                       |
| Ca_Desig_SNP1725 | [C/T]       | Ca_Desig_LG04              | 16.742                                       |

| <b>SNP IDs</b>   | <b>SNPs</b> | <b>Linkage Group (LGs)</b> | <b>Genetic positions (cM) of mapped SNPs</b> |
|------------------|-------------|----------------------------|----------------------------------------------|
| Ca_Desig_SNP1726 | [G/A]       | Ca_Desig_LG04              | 16.812                                       |
| Ca_Desig_SNP1727 | [C/T]       | Ca_Desig_LG04              | 17.222                                       |
| Ca_Desig_SNP1728 | [T/C]       | Ca_Desig_LG04              | 17.855                                       |
| Ca_Desig_SNP1729 | [T/G]       | Ca_Desig_LG04              | 18.028                                       |
| Ca_Desig_SNP1730 | [G/A]       | Ca_Desig_LG04              | 18.427                                       |
| Ca_Desig_SNP1731 | [A/G]       | Ca_Desig_LG04              | 18.675                                       |
| Ca_Desig_SNP1732 | [T/C]       | Ca_Desig_LG04              | 18.688                                       |
| Ca_Desig_SNP1733 | [C/T]       | Ca_Desig_LG04              | 18.859                                       |
| Ca_Desig_SNP1734 | [C/T]       | Ca_Desig_LG04              | 18.999                                       |
| Ca_Desig_SNP1735 | [T/G]       | Ca_Desig_LG04              | 19.170                                       |
| Ca_Desig_SNP1736 | [C/T]       | Ca_Desig_LG04              | 19.374                                       |
| Ca_Desig_SNP1737 | [A/T]       | Ca_Desig_LG04              | 19.467                                       |
| Ca_Desig_SNP1738 | [G/C]       | Ca_Desig_LG04              | 19.483                                       |
| Ca_Desig_SNP1739 | [C/T]       | Ca_Desig_LG04              | 20.158                                       |
| Ca_Desig_SNP1740 | [A/T]       | Ca_Desig_LG04              | 20.221                                       |
| Ca_Desig_SNP1741 | [C/T]       | Ca_Desig_LG04              | 20.302                                       |
| Ca_Desig_SNP1742 | [G/A]       | Ca_Desig_LG04              | 20.484                                       |
| Ca_Desig_SNP1743 | [G/A]       | Ca_Desig_LG04              | 20.511                                       |
| Ca_Desig_SNP1744 | [A/G]       | Ca_Desig_LG04              | 20.935                                       |
| Ca_Desig_SNP1745 | [C/T]       | Ca_Desig_LG04              | 21.144                                       |
| Ca_Desig_SNP1746 | [C/T]       | Ca_Desig_LG04              | 21.272                                       |
| Ca_Desig_SNP1747 | [T/G]       | Ca_Desig_LG04              | 21.285                                       |
| Ca_Desig_SNP1748 | [G/T]       | Ca_Desig_LG04              | 21.503                                       |
| Ca_Desig_SNP1749 | [A/T]       | Ca_Desig_LG04              | 21.757                                       |
| Ca_Desig_SNP1750 | [G/A]       | Ca_Desig_LG04              | 21.848                                       |
| Ca_Desig_SNP1751 | [A/T]       | Ca_Desig_LG04              | 21.851                                       |
| Ca_Desig_SNP1752 | [C/T]       | Ca_Desig_LG04              | 22.037                                       |
| Ca_Desig_SNP1753 | [C/G]       | Ca_Desig_LG04              | 22.104                                       |
| Ca_Desig_SNP1754 | [C/G]       | Ca_Desig_LG04              | 22.163                                       |
| Ca_Desig_SNP1755 | [T/C]       | Ca_Desig_LG04              | 22.198                                       |
| Ca_Desig_SNP1756 | [A/C]       | Ca_Desig_LG04              | 22.224                                       |
| Ca_Desig_SNP1757 | [T/C]       | Ca_Desig_LG04              | 22.238                                       |
| Ca_Desig_SNP1758 | [T/C]       | Ca_Desig_LG04              | 22.539                                       |
| Ca_Desig_SNP1759 | [T/A]       | Ca_Desig_LG04              | 22.632                                       |
| Ca_Desig_SNP1760 | [T/C]       | Ca_Desig_LG04              | 23.095                                       |
| Ca_Desig_SNP1761 | [T/C]       | Ca_Desig_LG04              | 23.267                                       |
| Ca_Desig_SNP1762 | [C/T]       | Ca_Desig_LG04              | 23.269                                       |
| Ca_Desig_SNP1763 | [G/A]       | Ca_Desig_LG04              | 23.343                                       |
| Ca_Desig_SNP1764 | [T/C]       | Ca_Desig_LG04              | 23.378                                       |
| Ca_Desig_SNP1765 | [C/T]       | Ca_Desig_LG04              | 23.422                                       |
| Ca_Desig_SNP1766 | [C/A]       | Ca_Desig_LG04              | 23.475                                       |
| Ca_Desig_SNP1767 | [A/G]       | Ca_Desig_LG04              | 23.576                                       |
| Ca_Desig_SNP1768 | [A/G]       | Ca_Desig_LG04              | 23.603                                       |
| Ca_Desig_SNP1769 | [C/T]       | Ca_Desig_LG04              | 23.780                                       |
| Ca_Desig_SNP1770 | [G/A]       | Ca_Desig_LG04              | 23.784                                       |
| Ca_Desig_SNP1771 | [A/G]       | Ca_Desig_LG04              | 24.000                                       |
| Ca_Desig_SNP1772 | [G/T]       | Ca_Desig_LG04              | 24.107                                       |
| Ca_Desig_SNP1773 | [G/C]       | Ca_Desig_LG04              | 24.244                                       |

| <b>SNP IDs</b>  | <b>SNPs</b> | <b>Linkage Group (LGs)</b> | <b>Genetic positions (cM) of mapped SNPs</b> |
|-----------------|-------------|----------------------------|----------------------------------------------|
| Ca_Desi_SNP1774 | [T/C]       | <i>Ca_Desi_LG04</i>        | 24.457                                       |
| Ca_Desi_SNP1775 | [C/A]       | <i>Ca_Desi_LG04</i>        | 24.505                                       |
| Ca_Desi_SNP1776 | [T/C]       | <i>Ca_Desi_LG04</i>        | 24.839                                       |
| Ca_Desi_SNP1777 | [T/C]       | <i>Ca_Desi_LG04</i>        | 25.093                                       |
| Ca_Desi_SNP1778 | [C/T]       | <i>Ca_Desi_LG04</i>        | 25.130                                       |
| Ca_Desi_SNP1779 | [G/A]       | <i>Ca_Desi_LG04</i>        | 25.179                                       |
| Ca_Desi_SNP1780 | [T/C]       | <i>Ca_Desi_LG04</i>        | 25.218                                       |
| Ca_Desi_SNP1781 | [T/C]       | <i>Ca_Desi_LG04</i>        | 25.234                                       |
| Ca_Desi_SNP1782 | [C/T]       | <i>Ca_Desi_LG04</i>        | 25.445                                       |
| Ca_Desi_SNP1783 | [C/T]       | <i>Ca_Desi_LG04</i>        | 25.496                                       |
| Ca_Desi_SNP1784 | [A/G]       | <i>Ca_Desi_LG04</i>        | 25.676                                       |
| Ca_Desi_SNP1785 | [G/A]       | <i>Ca_Desi_LG04</i>        | 25.773                                       |
| Ca_Desi_SNP1786 | [C/G]       | <i>Ca_Desi_LG04</i>        | 25.847                                       |
| Ca_Desi_SNP1787 | [T/A]       | <i>Ca_Desi_LG04</i>        | 25.862                                       |
| Ca_Desi_SNP1788 | [A/G]       | <i>Ca_Desi_LG04</i>        | 25.939                                       |
| Ca_Desi_SNP1789 | [C/G]       | <i>Ca_Desi_LG04</i>        | 26.049                                       |
| Ca_Desi_SNP1790 | [T/C]       | <i>Ca_Desi_LG04</i>        | 26.106                                       |
| Ca_Desi_SNP1791 | [T/C]       | <i>Ca_Desi_LG04</i>        | 26.148                                       |
| Ca_Desi_SNP1792 | [C/G]       | <i>Ca_Desi_LG04</i>        | 26.305                                       |
| Ca_Desi_SNP1793 | [T/A]       | <i>Ca_Desi_LG04</i>        | 26.465                                       |
| Ca_Desi_SNP1794 | [A/G]       | <i>Ca_Desi_LG04</i>        | 26.501                                       |
| Ca_Desi_SNP1795 | [G/A]       | <i>Ca_Desi_LG04</i>        | 26.553                                       |
| Ca_Desi_SNP1796 | [G/A]       | <i>Ca_Desi_LG04</i>        | 26.730                                       |
| Ca_Desi_SNP1797 | [C/T]       | <i>Ca_Desi_LG04</i>        | 26.913                                       |
| Ca_Desi_SNP1798 | [T/C]       | <i>Ca_Desi_LG04</i>        | 26.957                                       |
| Ca_Desi_SNP1799 | [T/C]       | <i>Ca_Desi_LG04</i>        | 27.367                                       |
| Ca_Desi_SNP1800 | [G/T]       | <i>Ca_Desi_LG04</i>        | 27.393                                       |
| Ca_Desi_SNP1801 | [A/C]       | <i>Ca_Desi_LG04</i>        | 27.646                                       |
| Ca_Desi_SNP1802 | [T/G]       | <i>Ca_Desi_LG04</i>        | 27.809                                       |
| Ca_Desi_SNP1803 | [A/C]       | <i>Ca_Desi_LG04</i>        | 27.868                                       |
| Ca_Desi_SNP1804 | [G/T]       | <i>Ca_Desi_LG04</i>        | 28.494                                       |
| Ca_Desi_SNP1805 | [G/T]       | <i>Ca_Desi_LG04</i>        | 28.738                                       |
| Ca_Desi_SNP1806 | [A/G]       | <i>Ca_Desi_LG04</i>        | 28.787                                       |
| Ca_Desi_SNP1807 | [G/T]       | <i>Ca_Desi_LG04</i>        | 28.796                                       |
| Ca_Desi_SNP1808 | [A/T]       | <i>Ca_Desi_LG04</i>        | 29.122                                       |
| Ca_Desi_SNP1809 | [G/T]       | <i>Ca_Desi_LG04</i>        | 29.601                                       |
| Ca_Desi_SNP1810 | [A/G]       | <i>Ca_Desi_LG04</i>        | 30.527                                       |
| Ca_Desi_SNP1811 | [G/A]       | <i>Ca_Desi_LG04</i>        | 30.944                                       |
| Ca_Desi_SNP1812 | [A/T]       | <i>Ca_Desi_LG04</i>        | 31.979                                       |
| Ca_Desi_SNP1813 | [G/T]       | <i>Ca_Desi_LG04</i>        | 32.255                                       |
| Ca_Desi_SNP1814 | [T/C]       | <i>Ca_Desi_LG04</i>        | 32.976                                       |
| Ca_Desi_SNP1815 | [G/C]       | <i>Ca_Desi_LG04</i>        | 33.669                                       |
| Ca_Desi_SNP1816 | [A/G]       | <i>Ca_Desi_LG04</i>        | 33.742                                       |
| Ca_Desi_SNP1817 | [A/G]       | <i>Ca_Desi_LG04</i>        | 34.507                                       |
| Ca_Desi_SNP1818 | [T/C]       | <i>Ca_Desi_LG04</i>        | 34.978                                       |
| Ca_Desi_SNP1819 | [A/C]       | <i>Ca_Desi_LG04</i>        | 35.207                                       |
| Ca_Desi_SNP1820 | [A/G]       | <i>Ca_Desi_LG04</i>        | 35.604                                       |
| Ca_Desi_SNP1821 | [A/C]       | <i>Ca_Desi_LG04</i>        | 36.342                                       |

| <b>SNP IDs</b>  | <b>SNPs</b> | <b>Linkage Group (LGs)</b> | <b>Genetic positions (cM) of mapped SNPs</b> |
|-----------------|-------------|----------------------------|----------------------------------------------|
| Ca_Desi_SNP1822 | [A/G]       | <i>Ca_Desi_LG04</i>        | 36.362                                       |
| Ca_Desi_SNP1823 | [A/G]       | <i>Ca_Desi_LG04</i>        | 37.198                                       |
| Ca_Desi_SNP1824 | [G/A]       | <i>Ca_Desi_LG04</i>        | 37.353                                       |
| Ca_Desi_SNP1825 | [T/G]       | <i>Ca_Desi_LG04</i>        | 38.530                                       |
| Ca_Desi_SNP1826 | [A/C]       | <i>Ca_Desi_LG04</i>        | 38.966                                       |
| Ca_Desi_SNP1827 | [T/A]       | <i>Ca_Desi_LG04</i>        | 39.302                                       |
| Ca_Desi_SNP1828 | [T/C]       | <i>Ca_Desi_LG04</i>        | 39.319                                       |
| Ca_Desi_SNP1829 | [T/G]       | <i>Ca_Desi_LG04</i>        | 39.380                                       |
| Ca_Desi_SNP1830 | [G/A]       | <i>Ca_Desi_LG04</i>        | 39.451                                       |
| Ca_Desi_SNP1831 | [T/G]       | <i>Ca_Desi_LG04</i>        | 39.648                                       |
| Ca_Desi_SNP1832 | [G/A]       | <i>Ca_Desi_LG04</i>        | 39.921                                       |
| Ca_Desi_SNP1833 | [C/T]       | <i>Ca_Desi_LG04</i>        | 40.115                                       |
| Ca_Desi_SNP1834 | [A/G]       | <i>Ca_Desi_LG04</i>        | 40.386                                       |
| Ca_Desi_SNP1835 | [A/C]       | <i>Ca_Desi_LG04</i>        | 40.401                                       |
| Ca_Desi_SNP1836 | [A/G]       | <i>Ca_Desi_LG04</i>        | 41.152                                       |
| Ca_Desi_SNP1837 | [A/G]       | <i>Ca_Desi_LG04</i>        | 41.203                                       |
| Ca_Desi_SNP1838 | [A/C]       | <i>Ca_Desi_LG04</i>        | 41.381                                       |
| Ca_Desi_SNP1839 | [C/A]       | <i>Ca_Desi_LG04</i>        | 41.421                                       |
| Ca_Desi_SNP1840 | [T/A]       | <i>Ca_Desi_LG04</i>        | 41.524                                       |
| Ca_Desi_SNP1841 | [T/C]       | <i>Ca_Desi_LG04</i>        | 42.254                                       |
| Ca_Desi_SNP1842 | [T/A]       | <i>Ca_Desi_LG04</i>        | 42.717                                       |
| Ca_Desi_SNP1843 | [C/T]       | <i>Ca_Desi_LG04</i>        | 42.994                                       |
| Ca_Desi_SNP1844 | [T/G]       | <i>Ca_Desi_LG04</i>        | 43.310                                       |
| Ca_Desi_SNP1845 | [C/T]       | <i>Ca_Desi_LG04</i>        | 43.450                                       |
| Ca_Desi_SNP1846 | [T/G]       | <i>Ca_Desi_LG04</i>        | 43.508                                       |
| Ca_Desi_SNP1847 | [C/T]       | <i>Ca_Desi_LG04</i>        | 43.518                                       |
| Ca_Desi_SNP1848 | [T/A]       | <i>Ca_Desi_LG04</i>        | 43.534                                       |
| Ca_Desi_SNP1849 | [G/T]       | <i>Ca_Desi_LG04</i>        | 43.584                                       |
| Ca_Desi_SNP1850 | [A/T]       | <i>Ca_Desi_LG04</i>        | 43.618                                       |
| Ca_Desi_SNP1851 | [T/A]       | <i>Ca_Desi_LG04</i>        | 43.641                                       |
| Ca_Desi_SNP1852 | [A/T]       | <i>Ca_Desi_LG04</i>        | 43.692                                       |
| Ca_Desi_SNP1853 | [C/A]       | <i>Ca_Desi_LG04</i>        | 43.735                                       |
| Ca_Desi_SNP1854 | [C/T]       | <i>Ca_Desi_LG04</i>        | 43.786                                       |
| Ca_Desi_SNP1855 | [A/G]       | <i>Ca_Desi_LG04</i>        | 43.799                                       |
| Ca_Desi_SNP1856 | [A/G]       | <i>Ca_Desi_LG04</i>        | 43.947                                       |
| Ca_Desi_SNP1857 | [T/C]       | <i>Ca_Desi_LG04</i>        | 43.988                                       |
| Ca_Desi_SNP1858 | [T/C]       | <i>Ca_Desi_LG04</i>        | 44.009                                       |
| Ca_Desi_SNP1859 | [A/G]       | <i>Ca_Desi_LG04</i>        | 44.015                                       |
| Ca_Desi_SNP1860 | [T/G]       | <i>Ca_Desi_LG04</i>        | 44.113                                       |
| Ca_Desi_SNP1861 | [A/C]       | <i>Ca_Desi_LG04</i>        | 44.170                                       |
| Ca_Desi_SNP1862 | [A/G]       | <i>Ca_Desi_LG04</i>        | 44.253                                       |
| Ca_Desi_SNP1863 | [T/C]       | <i>Ca_Desi_LG04</i>        | 44.351                                       |
| Ca_Desi_SNP1864 | [T/A]       | <i>Ca_Desi_LG04</i>        | 44.370                                       |
| Ca_Desi_SNP1865 | [G/A]       | <i>Ca_Desi_LG04</i>        | 44.382                                       |
| Ca_Desi_SNP1866 | [A/G]       | <i>Ca_Desi_LG04</i>        | 44.429                                       |
| Ca_Desi_SNP1867 | [A/C]       | <i>Ca_Desi_LG04</i>        | 44.433                                       |
| Ca_Desi_SNP1868 | [C/A]       | <i>Ca_Desi_LG04</i>        | 44.494                                       |
| Ca_Desi_SNP1869 | [G/A]       | <i>Ca_Desi_LG04</i>        | 44.511                                       |



| <b>SNP IDs</b>  | <b>SNPs</b> | <b>Linkage Group (LGs)</b> | <b>Genetic positions (cM) of mapped SNPs</b> |
|-----------------|-------------|----------------------------|----------------------------------------------|
| Ca_Desi_SNP1870 | [C/A]       | <i>Ca_Desi_LG04</i>        | 44.645                                       |
| Ca_Desi_SNP1871 | [G/A]       | <i>Ca_Desi_LG04</i>        | 44.676                                       |
| Ca_Desi_SNP1872 | [T/C]       | <i>Ca_Desi_LG04</i>        | 44.716                                       |
| Ca_Desi_SNP1873 | [A/T]       | <i>Ca_Desi_LG04</i>        | 44.754                                       |
| Ca_Desi_SNP1874 | [T/C]       | <i>Ca_Desi_LG04</i>        | 44.759                                       |
| Ca_Desi_SNP1875 | [A/C]       | <i>Ca_Desi_LG04</i>        | 44.791                                       |
| Ca_Desi_SNP1876 | [T/C]       | <i>Ca_Desi_LG04</i>        | 44.841                                       |
| Ca_Desi_SNP1877 | [G/T]       | <i>Ca_Desi_LG04</i>        | 44.874                                       |
| Ca_Desi_SNP1878 | [T/G]       | <i>Ca_Desi_LG04</i>        | 44.907                                       |
| Ca_Desi_SNP1879 | [A/G]       | <i>Ca_Desi_LG04</i>        | 44.963                                       |
| Ca_Desi_SNP1880 | [A/C]       | <i>Ca_Desi_LG04</i>        | 45.091                                       |
| Ca_Desi_SNP1881 | [A/C]       | <i>Ca_Desi_LG04</i>        | 45.143                                       |
| Ca_Desi_SNP1882 | [G/A]       | <i>Ca_Desi_LG04</i>        | 45.362                                       |
| Ca_Desi_SNP1883 | [C/T]       | <i>Ca_Desi_LG04</i>        | 45.387                                       |
| Ca_Desi_SNP1884 | [A/T]       | <i>Ca_Desi_LG04</i>        | 45.388                                       |
| Ca_Desi_SNP1885 | [C/T]       | <i>Ca_Desi_LG04</i>        | 45.397                                       |
| Ca_Desi_SNP1886 | [T/A]       | <i>Ca_Desi_LG04</i>        | 45.470                                       |
| Ca_Desi_SNP1887 | [T/C]       | <i>Ca_Desi_LG04</i>        | 45.486                                       |
| Ca_Desi_SNP1888 | [T/C]       | <i>Ca_Desi_LG04</i>        | 45.700                                       |
| Ca_Desi_SNP1889 | [A/G]       | <i>Ca_Desi_LG04</i>        | 45.724                                       |
| Ca_Desi_SNP1890 | [G/A]       | <i>Ca_Desi_LG04</i>        | 45.828                                       |
| Ca_Desi_SNP1891 | [A/C]       | <i>Ca_Desi_LG04</i>        | 45.873                                       |
| Ca_Desi_SNP1892 | [C/G]       | <i>Ca_Desi_LG04</i>        | 45.947                                       |
| Ca_Desi_SNP1893 | [C/T]       | <i>Ca_Desi_LG04</i>        | 45.994                                       |
| Ca_Desi_SNP1894 | [G/A]       | <i>Ca_Desi_LG04</i>        | 46.016                                       |
| Ca_Desi_SNP1895 | [T/A]       | <i>Ca_Desi_LG04</i>        | 46.053                                       |
| Ca_Desi_SNP1896 | [G/A]       | <i>Ca_Desi_LG04</i>        | 46.122                                       |
| Ca_Desi_SNP1897 | [C/G]       | <i>Ca_Desi_LG04</i>        | 46.144                                       |
| Ca_Desi_SNP1898 | [T/A]       | <i>Ca_Desi_LG04</i>        | 46.460                                       |
| Ca_Desi_SNP1899 | [C/A]       | <i>Ca_Desi_LG04</i>        | 46.573                                       |
| Ca_Desi_SNP1900 | [T/G]       | <i>Ca_Desi_LG04</i>        | 46.820                                       |
| Ca_Desi_SNP1901 | [T/C]       | <i>Ca_Desi_LG04</i>        | 46.899                                       |
| Ca_Desi_SNP1902 | [G/A]       | <i>Ca_Desi_LG04</i>        | 46.899                                       |
| Ca_Desi_SNP1903 | [T/G]       | <i>Ca_Desi_LG04</i>        | 47.110                                       |
| Ca_Desi_SNP1904 | [T/C]       | <i>Ca_Desi_LG04</i>        | 47.123                                       |
| Ca_Desi_SNP1905 | [A/G]       | <i>Ca_Desi_LG04</i>        | 47.162                                       |
| Ca_Desi_SNP1906 | [A/T]       | <i>Ca_Desi_LG04</i>        | 47.236                                       |
| Ca_Desi_SNP1907 | [T/C]       | <i>Ca_Desi_LG04</i>        | 47.259                                       |
| Ca_Desi_SNP1908 | [C/T]       | <i>Ca_Desi_LG04</i>        | 47.474                                       |
| Ca_Desi_SNP1909 | [C/A]       | <i>Ca_Desi_LG04</i>        | 47.538                                       |
| Ca_Desi_SNP1910 | [A/G]       | <i>Ca_Desi_LG04</i>        | 47.538                                       |
| Ca_Desi_SNP1911 | [C/A]       | <i>Ca_Desi_LG04</i>        | 47.566                                       |
| Ca_Desi_SNP1912 | [T/C]       | <i>Ca_Desi_LG04</i>        | 47.572                                       |
| Ca_Desi_SNP1913 | [G/A]       | <i>Ca_Desi_LG04</i>        | 47.584                                       |
| Ca_Desi_SNP1914 | [A/G]       | <i>Ca_Desi_LG04</i>        | 47.605                                       |
| Ca_Desi_SNP1915 | [C/T]       | <i>Ca_Desi_LG04</i>        | 47.641                                       |
| Ca_Desi_SNP1916 | [G/A]       | <i>Ca_Desi_LG04</i>        | 47.693                                       |
| Ca_Desi_SNP1917 | [A/T]       | <i>Ca_Desi_LG04</i>        | 47.696                                       |

| <b>SNP IDs</b>   | <b>SNPs</b> | <b>Linkage Group (LGs)</b> | <b>Genetic positions (cM) of mapped SNPs</b> |
|------------------|-------------|----------------------------|----------------------------------------------|
| Ca_Desig_SNP1918 | [A/C]       | Ca_Desig_LG04              | 47.757                                       |
| Ca_Desig_SNP1919 | [T/A]       | Ca_Desig_LG04              | 47.766                                       |
| Ca_Desig_SNP1920 | [A/G]       | Ca_Desig_LG04              | 47.769                                       |
| Ca_Desig_SNP1921 | [C/A]       | Ca_Desig_LG04              | 47.822                                       |
| Ca_Desig_SNP1922 | [G/T]       | Ca_Desig_LG04              | 47.879                                       |
| Ca_Desig_SNP1923 | [C/A]       | Ca_Desig_LG04              | 48.018                                       |
| Ca_Desig_SNP1924 | [G/T]       | Ca_Desig_LG04              | 48.045                                       |
| Ca_Desig_SNP1925 | [C/T]       | Ca_Desig_LG04              | 48.048                                       |
| Ca_Desig_SNP1926 | [G/A]       | Ca_Desig_LG04              | 48.085                                       |
| Ca_Desig_SNP1927 | [G/A]       | Ca_Desig_LG04              | 48.131                                       |
| Ca_Desig_SNP1928 | [T/A]       | Ca_Desig_LG04              | 48.147                                       |
| Ca_Desig_SNP1929 | [T/A]       | Ca_Desig_LG04              | 48.152                                       |
| Ca_Desig_SNP1930 | [G/T]       | Ca_Desig_LG04              | 48.178                                       |
| Ca_Desig_SNP1931 | [A/G]       | Ca_Desig_LG04              | 48.197                                       |
| Ca_Desig_SNP1932 | [T/G]       | Ca_Desig_LG04              | 48.201                                       |
| Ca_Desig_SNP1933 | [G/T]       | Ca_Desig_LG04              | 48.263                                       |
| Ca_Desig_SNP1934 | [G/A]       | Ca_Desig_LG04              | 48.266                                       |
| Ca_Desig_SNP1935 | [T/G]       | Ca_Desig_LG04              | 48.279                                       |
| Ca_Desig_SNP1936 | [T/C]       | Ca_Desig_LG04              | 48.328                                       |
| Ca_Desig_SNP1937 | [A/G]       | Ca_Desig_LG04              | 48.442                                       |
| Ca_Desig_SNP1938 | [A/G]       | Ca_Desig_LG04              | 48.474                                       |
| Ca_Desig_SNP1939 | [A/G]       | Ca_Desig_LG04              | 48.493                                       |
| Ca_Desig_SNP1940 | [C/A]       | Ca_Desig_LG04              | 48.502                                       |
| Ca_Desig_SNP1941 | [A/G]       | Ca_Desig_LG04              | 48.542                                       |
| Ca_Desig_SNP1942 | [T/C]       | Ca_Desig_LG04              | 48.619                                       |
| Ca_Desig_SNP1943 | [G/A]       | Ca_Desig_LG04              | 48.632                                       |
| Ca_Desig_SNP1944 | [A/G]       | Ca_Desig_LG04              | 48.637                                       |
| Ca_Desig_SNP1945 | [T/A]       | Ca_Desig_LG04              | 48.726                                       |
| Ca_Desig_SNP1946 | [T/G]       | Ca_Desig_LG04              | 48.769                                       |
| Ca_Desig_SNP1947 | [A/G]       | Ca_Desig_LG04              | 48.858                                       |
| Ca_Desig_SNP1948 | [A/G]       | Ca_Desig_LG04              | 48.868                                       |
| Ca_Desig_SNP1949 | [A/C]       | Ca_Desig_LG04              | 48.928                                       |
| Ca_Desig_SNP1950 | [T/G]       | Ca_Desig_LG04              | 48.950                                       |
| Ca_Desig_SNP1951 | [C/T]       | Ca_Desig_LG04              | 48.998                                       |
| Ca_Desig_SNP1952 | [A/G]       | Ca_Desig_LG04              | 49.023                                       |
| Ca_Desig_SNP1953 | [T/C]       | Ca_Desig_LG04              | 49.040                                       |
| Ca_Desig_SNP1954 | [G/A]       | Ca_Desig_LG04              | 49.073                                       |
| Ca_Desig_SNP1955 | [A/G]       | Ca_Desig_LG04              | 49.188                                       |
| Ca_Desig_SNP1956 | [A/G]       | Ca_Desig_LG04              | 49.255                                       |
| Ca_Desig_SNP1957 | [A/G]       | Ca_Desig_LG04              | 49.291                                       |
| Ca_Desig_SNP1958 | [G/T]       | Ca_Desig_LG04              | 49.305                                       |
| Ca_Desig_SNP1959 | [T/C]       | Ca_Desig_LG04              | 49.314                                       |
| Ca_Desig_SNP1960 | [C/T]       | Ca_Desig_LG04              | 49.351                                       |
| Ca_Desig_SNP1961 | [A/C]       | Ca_Desig_LG04              | 49.409                                       |
| Ca_Desig_SNP1962 | [T/G]       | Ca_Desig_LG04              | 49.424                                       |
| Ca_Desig_SNP1963 | [C/G]       | Ca_Desig_LG04              | 49.434                                       |
| Ca_Desig_SNP1964 | [G/A]       | Ca_Desig_LG04              | 49.475                                       |
| Ca_Desig_SNP1965 | [C/A]       | Ca_Desig_LG04              | 49.511                                       |

| <b>SNP IDs</b>   | <b>SNPs</b> | <b>Linkage Group (LGs)</b> | <b>Genetic positions (cM) of mapped SNPs</b> |
|------------------|-------------|----------------------------|----------------------------------------------|
| Ca_Desig_SNP1966 | [G/A]       | Ca_Desig_LG04              | 49.571                                       |
| Ca_Desig_SNP1967 | [T/A]       | Ca_Desig_LG04              | 49.594                                       |
| Ca_Desig_SNP1968 | [A/G]       | Ca_Desig_LG04              | 49.618                                       |
| Ca_Desig_SNP1969 | [G/A]       | Ca_Desig_LG04              | 49.622                                       |
| Ca_Desig_SNP1970 | [T/G]       | Ca_Desig_LG04              | 49.670                                       |
| Ca_Desig_SNP1971 | [C/A]       | Ca_Desig_LG04              | 49.758                                       |
| Ca_Desig_SNP1972 | [A/G]       | Ca_Desig_LG04              | 49.762                                       |
| Ca_Desig_SNP1973 | [C/T]       | Ca_Desig_LG04              | 49.810                                       |
| Ca_Desig_SNP1974 | [C/G]       | Ca_Desig_LG04              | 49.811                                       |
| Ca_Desig_SNP1975 | [C/T]       | Ca_Desig_LG04              | 49.811                                       |
| Ca_Desig_SNP1976 | [A/C]       | Ca_Desig_LG04              | 49.815                                       |
| Ca_Desig_SNP1977 | [A/G]       | Ca_Desig_LG04              | 49.819                                       |
| Ca_Desig_SNP1978 | [A/G]       | Ca_Desig_LG04              | 49.862                                       |
| Ca_Desig_SNP1979 | [G/A]       | Ca_Desig_LG04              | 49.866                                       |
| Ca_Desig_SNP1980 | [C/G]       | Ca_Desig_LG04              | 49.872                                       |
| Ca_Desig_SNP1981 | [C/A]       | Ca_Desig_LG04              | 49.914                                       |
| Ca_Desig_SNP1982 | [G/A]       | Ca_Desig_LG04              | 49.916                                       |
| Ca_Desig_SNP1983 | [G/T]       | Ca_Desig_LG04              | 49.936                                       |
| Ca_Desig_SNP1984 | [C/G]       | Ca_Desig_LG04              | 49.994                                       |
| Ca_Desig_SNP1985 | [A/T]       | Ca_Desig_LG04              | 49.997                                       |
| Ca_Desig_SNP1986 | [T/G]       | Ca_Desig_LG04              | 50.085                                       |
| Ca_Desig_SNP1987 | [A/T]       | Ca_Desig_LG04              | 50.088                                       |
| Ca_Desig_SNP1988 | [A/G]       | Ca_Desig_LG04              | 50.200                                       |
| Ca_Desig_SNP1989 | [A/G]       | Ca_Desig_LG04              | 50.249                                       |
| Ca_Desig_SNP1990 | [A/C]       | Ca_Desig_LG04              | 50.315                                       |
| Ca_Desig_SNP1991 | [A/T]       | Ca_Desig_LG04              | 50.316                                       |
| Ca_Desig_SNP1992 | [C/A]       | Ca_Desig_LG04              | 50.347                                       |
| Ca_Desig_SNP1993 | [C/T]       | Ca_Desig_LG04              | 50.381                                       |
| Ca_Desig_SNP1994 | [A/G]       | Ca_Desig_LG04              | 50.388                                       |
| Ca_Desig_SNP1995 | [G/T]       | Ca_Desig_LG04              | 50.410                                       |
| Ca_Desig_SNP1996 | [A/C]       | Ca_Desig_LG04              | 50.420                                       |
| Ca_Desig_SNP1997 | [T/C]       | Ca_Desig_LG04              | 50.637                                       |
| Ca_Desig_SNP1998 | [T/C]       | Ca_Desig_LG04              | 50.659                                       |
| Ca_Desig_SNP1999 | [G/A]       | Ca_Desig_LG04              | 50.667                                       |
| Ca_Desig_SNP2000 | [G/A]       | Ca_Desig_LG04              | 50.693                                       |
| Ca_Desig_SNP2001 | [T/G]       | Ca_Desig_LG04              | 50.695                                       |
| Ca_Desig_SNP2002 | [C/A]       | Ca_Desig_LG04              | 50.719                                       |
| Ca_Desig_SNP2003 | [G/C]       | Ca_Desig_LG04              | 50.730                                       |
| Ca_Desig_SNP2004 | [T/C]       | Ca_Desig_LG04              | 50.848                                       |
| Ca_Desig_SNP2005 | [C/G]       | Ca_Desig_LG04              | 50.849                                       |
| Ca_Desig_SNP2006 | [A/G]       | Ca_Desig_LG04              | 50.860                                       |
| Ca_Desig_SNP2007 | [C/T]       | Ca_Desig_LG04              | 50.969                                       |
| Ca_Desig_SNP2008 | [C/G]       | Ca_Desig_LG04              | 51.036                                       |
| Ca_Desig_SNP2009 | [A/G]       | Ca_Desig_LG04              | 51.119                                       |
| Ca_Desig_SNP2010 | [G/T]       | Ca_Desig_LG04              | 51.282                                       |
| Ca_Desig_SNP2011 | [C/A]       | Ca_Desig_LG04              | 51.285                                       |
| Ca_Desig_SNP2012 | [A/T]       | Ca_Desig_LG04              | 51.287                                       |
| Ca_Desig_SNP2013 | [T/C]       | Ca_Desig_LG04              | 51.308                                       |

| <b>SNP IDs</b>   | <b>SNPs</b> | <b>Linkage Group (LGs)</b> | <b>Genetic positions (cM) of mapped SNPs</b> |
|------------------|-------------|----------------------------|----------------------------------------------|
| Ca_Desig_SNP2014 | [T/A]       | Ca_Desig_LG04              | 51.372                                       |
| Ca_Desig_SNP2015 | [A/C]       | Ca_Desig_LG04              | 51.431                                       |
| Ca_Desig_SNP2016 | [A/G]       | Ca_Desig_LG04              | 51.437                                       |
| Ca_Desig_SNP2017 | [C/T]       | Ca_Desig_LG04              | 51.473                                       |
| Ca_Desig_SNP2018 | [T/G]       | Ca_Desig_LG04              | 51.504                                       |
| Ca_Desig_SNP2019 | [T/C]       | Ca_Desig_LG04              | 51.565                                       |
| Ca_Desig_SNP2020 | [A/G]       | Ca_Desig_LG04              | 51.584                                       |
| Ca_Desig_SNP2021 | [T/C]       | Ca_Desig_LG04              | 51.598                                       |
| Ca_Desig_SNP2022 | [C/A]       | Ca_Desig_LG04              | 51.632                                       |
| Ca_Desig_SNP2023 | [C/T]       | Ca_Desig_LG04              | 51.702                                       |
| Ca_Desig_SNP2024 | [T/C]       | Ca_Desig_LG04              | 51.713                                       |
| Ca_Desig_SNP2025 | [A/C]       | Ca_Desig_LG04              | 51.717                                       |
| Ca_Desig_SNP2026 | [C/G]       | Ca_Desig_LG04              | 51.799                                       |
| Ca_Desig_SNP2027 | [T/G]       | Ca_Desig_LG04              | 51.835                                       |
| Ca_Desig_SNP2028 | [A/T]       | Ca_Desig_LG04              | 51.893                                       |
| Ca_Desig_SNP2029 | [A/G]       | Ca_Desig_LG04              | 51.899                                       |
| Ca_Desig_SNP2030 | [A/T]       | Ca_Desig_LG04              | 51.933                                       |
| Ca_Desig_SNP2031 | [T/C]       | Ca_Desig_LG04              | 52.042                                       |
| Ca_Desig_SNP2032 | [T/C]       | Ca_Desig_LG04              | 52.079                                       |
| Ca_Desig_SNP2033 | [A/G]       | Ca_Desig_LG04              | 52.168                                       |
| Ca_Desig_SNP2034 | [A/C]       | Ca_Desig_LG04              | 52.195                                       |
| Ca_Desig_SNP2035 | [T/C]       | Ca_Desig_LG04              | 52.283                                       |
| Ca_Desig_SNP2036 | [T/C]       | Ca_Desig_LG04              | 52.307                                       |
| Ca_Desig_SNP2037 | [T/A]       | Ca_Desig_LG04              | 52.307                                       |
| Ca_Desig_SNP2038 | [G/A]       | Ca_Desig_LG04              | 52.311                                       |
| Ca_Desig_SNP2039 | [T/A]       | Ca_Desig_LG04              | 52.330                                       |
| Ca_Desig_SNP2040 | [C/T]       | Ca_Desig_LG04              | 52.483                                       |
| Ca_Desig_SNP2041 | [G/C]       | Ca_Desig_LG04              | 52.749                                       |
| Ca_Desig_SNP2042 | [C/T]       | Ca_Desig_LG04              | 52.793                                       |
| Ca_Desig_SNP2043 | [C/T]       | Ca_Desig_LG04              | 52.900                                       |
| Ca_Desig_SNP2044 | [G/A]       | Ca_Desig_LG04              | 52.965                                       |
| Ca_Desig_SNP2045 | [A/G]       | Ca_Desig_LG04              | 53.152                                       |
| Ca_Desig_SNP2046 | [A/C]       | Ca_Desig_LG04              | 53.171                                       |
| Ca_Desig_SNP2047 | [C/T]       | Ca_Desig_LG04              | 53.216                                       |
| Ca_Desig_SNP2048 | [T/C]       | Ca_Desig_LG04              | 53.479                                       |
| Ca_Desig_SNP2049 | [C/T]       | Ca_Desig_LG04              | 53.518                                       |
| Ca_Desig_SNP2050 | [T/C]       | Ca_Desig_LG04              | 53.592                                       |
| Ca_Desig_SNP2051 | [T/C]       | Ca_Desig_LG04              | 53.685                                       |
| Ca_Desig_SNP2052 | [A/G]       | Ca_Desig_LG04              | 53.740                                       |
| Ca_Desig_SNP2053 | [T/C]       | Ca_Desig_LG04              | 53.805                                       |
| Ca_Desig_SNP2054 | [T/C]       | Ca_Desig_LG04              | 53.830                                       |
| Ca_Desig_SNP2055 | [G/A]       | Ca_Desig_LG04              | 53.954                                       |
| Ca_Desig_SNP2056 | [T/G]       | Ca_Desig_LG04              | 54.021                                       |
| Ca_Desig_SNP2057 | [T/A]       | Ca_Desig_LG04              | 54.089                                       |
| Ca_Desig_SNP2058 | [C/A]       | Ca_Desig_LG04              | 54.161                                       |
| Ca_Desig_SNP2059 | [G/T]       | Ca_Desig_LG04              | 54.167                                       |
| Ca_Desig_SNP2060 | [T/C]       | Ca_Desig_LG04              | 54.181                                       |
| Ca_Desig_SNP2061 | [C/T]       | Ca_Desig_LG04              | 54.237                                       |

| <b>SNP IDs</b>  | <b>SNPs</b> | <b>Linkage Group (LGs)</b> | <b>Genetic positions (cM) of mapped SNPs</b> |
|-----------------|-------------|----------------------------|----------------------------------------------|
| Ca_Desi_SNP2062 | [C/G]       | <i>Ca_Desi_LG04</i>        | 54.263                                       |
| Ca_Desi_SNP2063 | [A/T]       | <i>Ca_Desi_LG04</i>        | 54.309                                       |
| Ca_Desi_SNP2064 | [C/T]       | <i>Ca_Desi_LG04</i>        | 54.352                                       |
| Ca_Desi_SNP2065 | [A/T]       | <i>Ca_Desi_LG04</i>        | 54.360                                       |
| Ca_Desi_SNP2066 | [A/C]       | <i>Ca_Desi_LG04</i>        | 54.370                                       |
| Ca_Desi_SNP2067 | [T/G]       | <i>Ca_Desi_LG04</i>        | 54.471                                       |
| Ca_Desi_SNP2068 | [A/G]       | <i>Ca_Desi_LG04</i>        | 54.662                                       |
| Ca_Desi_SNP2069 | [C/A]       | <i>Ca_Desi_LG04</i>        | 54.709                                       |
| Ca_Desi_SNP2070 | [T/C]       | <i>Ca_Desi_LG04</i>        | 54.740                                       |
| Ca_Desi_SNP2071 | [G/A]       | <i>Ca_Desi_LG04</i>        | 54.918                                       |
| Ca_Desi_SNP2072 | [A/C]       | <i>Ca_Desi_LG04</i>        | 54.957                                       |
| Ca_Desi_SNP2073 | [G/A]       | <i>Ca_Desi_LG04</i>        | 55.199                                       |
| Ca_Desi_SNP2074 | [A/G]       | <i>Ca_Desi_LG04</i>        | 55.305                                       |
| Ca_Desi_SNP2075 | [T/C]       | <i>Ca_Desi_LG04</i>        | 55.511                                       |
| Ca_Desi_SNP2076 | [T/C]       | <i>Ca_Desi_LG04</i>        | 55.572                                       |
| Ca_Desi_SNP2077 | [T/C]       | <i>Ca_Desi_LG04</i>        | 55.715                                       |
| Ca_Desi_SNP2078 | [C/T]       | <i>Ca_Desi_LG04</i>        | 55.735                                       |
| Ca_Desi_SNP2079 | [T/G]       | <i>Ca_Desi_LG04</i>        | 55.746                                       |
| Ca_Desi_SNP2080 | [G/A]       | <i>Ca_Desi_LG04</i>        | 55.821                                       |
| Ca_Desi_SNP2081 | [T/C]       | <i>Ca_Desi_LG04</i>        | 55.830                                       |
| Ca_Desi_SNP2082 | [T/A]       | <i>Ca_Desi_LG04</i>        | 55.930                                       |
| Ca_Desi_SNP2083 | [G/T]       | <i>Ca_Desi_LG04</i>        | 56.077                                       |
| Ca_Desi_SNP2084 | [A/T]       | <i>Ca_Desi_LG04</i>        | 56.093                                       |
| Ca_Desi_SNP2085 | [T/C]       | <i>Ca_Desi_LG04</i>        | 56.142                                       |
| Ca_Desi_SNP2086 | [C/T]       | <i>Ca_Desi_LG04</i>        | 56.189                                       |
| Ca_Desi_SNP2087 | [G/T]       | <i>Ca_Desi_LG04</i>        | 56.269                                       |
| Ca_Desi_SNP2088 | [G/A]       | <i>Ca_Desi_LG04</i>        | 56.304                                       |
| Ca_Desi_SNP2089 | [T/C]       | <i>Ca_Desi_LG04</i>        | 56.435                                       |
| Ca_Desi_SNP2090 | [A/T]       | <i>Ca_Desi_LG04</i>        | 56.442                                       |
| Ca_Desi_SNP2091 | [A/C]       | <i>Ca_Desi_LG04</i>        | 56.604                                       |
| Ca_Desi_SNP2092 | [G/A]       | <i>Ca_Desi_LG04</i>        | 56.636                                       |
| Ca_Desi_SNP2093 | [A/G]       | <i>Ca_Desi_LG04</i>        | 56.844                                       |
| Ca_Desi_SNP2094 | [A/G]       | <i>Ca_Desi_LG04</i>        | 56.949                                       |
| Ca_Desi_SNP2095 | [C/A]       | <i>Ca_Desi_LG04</i>        | 57.090                                       |
| Ca_Desi_SNP2096 | [T/C]       | <i>Ca_Desi_LG04</i>        | 57.146                                       |
| Ca_Desi_SNP2097 | [G/A]       | <i>Ca_Desi_LG04</i>        | 57.151                                       |
| Ca_Desi_SNP2098 | [T/C]       | <i>Ca_Desi_LG04</i>        | 57.365                                       |
| Ca_Desi_SNP2099 | [T/G]       | <i>Ca_Desi_LG04</i>        | 57.464                                       |
| Ca_Desi_SNP2100 | [G/C]       | <i>Ca_Desi_LG04</i>        | 57.498                                       |
| Ca_Desi_SNP2101 | [A/G]       | <i>Ca_Desi_LG04</i>        | 57.543                                       |
| Ca_Desi_SNP2102 | [C/T]       | <i>Ca_Desi_LG04</i>        | 57.561                                       |
| Ca_Desi_SNP2103 | [C/T]       | <i>Ca_Desi_LG04</i>        | 57.640                                       |
| Ca_Desi_SNP2104 | [G/A]       | <i>Ca_Desi_LG04</i>        | 57.948                                       |
| Ca_Desi_SNP2105 | [A/C]       | <i>Ca_Desi_LG04</i>        | 58.166                                       |
| Ca_Desi_SNP2106 | [C/A]       | <i>Ca_Desi_LG04</i>        | 58.210                                       |
| Ca_Desi_SNP2107 | [T/G]       | <i>Ca_Desi_LG04</i>        | 58.385                                       |
| Ca_Desi_SNP2108 | [G/T]       | <i>Ca_Desi_LG04</i>        | 58.519                                       |
| Ca_Desi_SNP2109 | [G/A]       | <i>Ca_Desi_LG04</i>        | 58.531                                       |

| SNP IDs          | SNPs  | Linkage Group (LGs) | Genetic positions (cM) of mapped SNPs |
|------------------|-------|---------------------|---------------------------------------|
| Ca_Desig_SNP2110 | [A/C] | Ca_Desig_LG04       | 58.549                                |
| Ca_Desig_SNP2111 | [T/G] | Ca_Desig_LG04       | 58.697                                |
| Ca_Desig_SNP2112 | [A/G] | Ca_Desig_LG04       | 59.364                                |
| Ca_Desig_SNP2113 | [T/G] | Ca_Desig_LG04       | 59.452                                |
| Ca_Desig_SNP2114 | [T/C] | Ca_Desig_LG04       | 59.616                                |
| Ca_Desig_SNP2115 | [T/C] | Ca_Desig_LG04       | 59.781                                |
| Ca_Desig_SNP2116 | [G/T] | Ca_Desig_LG04       | 59.818                                |
| Ca_Desig_SNP2117 | [C/T] | Ca_Desig_LG04       | 59.853                                |
| Ca_Desig_SNP2118 | [T/C] | Ca_Desig_LG04       | 60.563                                |
| Ca_Desig_SNP2119 | [T/G] | Ca_Desig_LG04       | 60.887                                |
| Ca_Desig_SNP2120 | [C/A] | Ca_Desig_LG04       | 60.901                                |
| Ca_Desig_SNP2121 | [T/C] | Ca_Desig_LG04       | 61.071                                |
| Ca_Desig_SNP2122 | [T/G] | Ca_Desig_LG04       | 61.124                                |
| Ca_Desig_SNP2123 | [T/G] | Ca_Desig_LG04       | 61.131                                |
| Ca_Desig_SNP2124 | [A/C] | Ca_Desig_LG04       | 61.439                                |
| Ca_Desig_SNP2125 | [C/T] | Ca_Desig_LG04       | 61.603                                |
| Ca_Desig_SNP2126 | [C/A] | Ca_Desig_LG04       | 61.706                                |
| Ca_Desig_SNP2127 | [A/C] | Ca_Desig_LG04       | 61.914                                |
| Ca_Desig_SNP2128 | [T/G] | Ca_Desig_LG04       | 62.546                                |
| Ca_Desig_SNP2129 | [A/G] | Ca_Desig_LG04       | 63.085                                |
| Ca_Desig_SNP2130 | [C/A] | Ca_Desig_LG04       | 63.295                                |
| Ca_Desig_SNP2131 | [A/G] | Ca_Desig_LG04       | 63.969                                |
| Ca_Desig_SNP2132 | [G/T] | Ca_Desig_LG04       | 64.063                                |
| Ca_Desig_SNP2133 | [C/A] | Ca_Desig_LG04       | 64.875                                |
| Ca_Desig_SNP2134 | [G/T] | Ca_Desig_LG04       | 64.952                                |
| Ca_Desig_SNP2135 | [C/A] | Ca_Desig_LG04       | 65.233                                |
| Ca_Desig_SNP2136 | [A/G] | Ca_Desig_LG04       | 65.669                                |
| Ca_Desig_SNP2137 | [C/T] | Ca_Desig_LG04       | 65.891                                |
| Ca_Desig_SNP2138 | [A/G] | Ca_Desig_LG04       | 65.893                                |
| Ca_Desig_SNP2139 | [G/A] | Ca_Desig_LG04       | 65.936                                |
| Ca_Desig_SNP2140 | [T/A] | Ca_Desig_LG04       | 66.146                                |
| Ca_Desig_SNP2141 | [C/A] | Ca_Desig_LG04       | 66.152                                |
| Ca_Desig_SNP2142 | [C/A] | Ca_Desig_LG04       | 66.179                                |
| Ca_Desig_SNP2143 | [A/G] | Ca_Desig_LG04       | 66.370                                |
| Ca_Desig_SNP2144 | [A/G] | Ca_Desig_LG04       | 66.488                                |
| Ca_Desig_SNP2145 | [G/A] | Ca_Desig_LG04       | 66.921                                |
| Ca_Desig_SNP2146 | [T/C] | Ca_Desig_LG04       | 67.018                                |
| Ca_Desig_SNP2147 | [C/T] | Ca_Desig_LG04       | 67.063                                |
| Ca_Desig_SNP2148 | [T/A] | Ca_Desig_LG04       | 67.115                                |
| Ca_Desig_SNP2149 | [A/T] | Ca_Desig_LG04       | 67.225                                |
| Ca_Desig_SNP2150 | [T/C] | Ca_Desig_LG04       | 67.227                                |
| Ca_Desig_SNP2151 | [A/C] | Ca_Desig_LG04       | 67.299                                |
| Ca_Desig_SNP2152 | [T/C] | Ca_Desig_LG04       | 67.322                                |
| Ca_Desig_SNP2153 | [T/C] | Ca_Desig_LG04       | 67.487                                |
| Ca_Desig_SNP2154 | [A/C] | Ca_Desig_LG04       | 67.516                                |
| Ca_Desig_SNP2155 | [G/A] | Ca_Desig_LG04       | 67.633                                |
| Ca_Desig_SNP2156 | [A/C] | Ca_Desig_LG04       | 67.670                                |
| Ca_Desig_SNP2157 | [G/A] | Ca_Desig_LG04       | 67.724                                |

| <b>SNP IDs</b>   | <b>SNPs</b> | <b>Linkage Group (LGs)</b> | <b>Genetic positions (cM) of mapped SNPs</b> |
|------------------|-------------|----------------------------|----------------------------------------------|
| Ca_Desig_SNP2158 | [A/G]       | Ca_Desig_LG04              | 67.746                                       |
| Ca_Desig_SNP2159 | [A/G]       | Ca_Desig_LG04              | 67.944                                       |
| Ca_Desig_SNP2160 | [T/C]       | Ca_Desig_LG04              | 68.026                                       |
| Ca_Desig_SNP2161 | [C/G]       | Ca_Desig_LG04              | 68.223                                       |
| Ca_Desig_SNP2162 | [C/A]       | Ca_Desig_LG04              | 68.352                                       |
| Ca_Desig_SNP2163 | [C/T]       | Ca_Desig_LG04              | 68.360                                       |
| Ca_Desig_SNP2164 | [G/C]       | Ca_Desig_LG04              | 68.598                                       |
| Ca_Desig_SNP2165 | [G/A]       | Ca_Desig_LG04              | 68.788                                       |
| Ca_Desig_SNP2166 | [T/C]       | Ca_Desig_LG04              | 68.868                                       |
| Ca_Desig_SNP2167 | [G/T]       | Ca_Desig_LG04              | 68.916                                       |
| Ca_Desig_SNP2168 | [A/G]       | Ca_Desig_LG04              | 69.187                                       |
| Ca_Desig_SNP2169 | [C/T]       | Ca_Desig_LG04              | 69.259                                       |
| Ca_Desig_SNP2170 | [A/T]       | Ca_Desig_LG04              | 69.377                                       |
| Ca_Desig_SNP2171 | [A/G]       | Ca_Desig_LG04              | 69.411                                       |
| Ca_Desig_SNP2172 | [A/G]       | Ca_Desig_LG04              | 69.432                                       |
| Ca_Desig_SNP2173 | [C/T]       | Ca_Desig_LG04              | 69.831                                       |
| Ca_Desig_SNP2174 | [G/A]       | Ca_Desig_LG04              | 69.855                                       |
| Ca_Desig_SNP2175 | [A/G]       | Ca_Desig_LG04              | 69.888                                       |
| Ca_Desig_SNP2176 | [G/A]       | Ca_Desig_LG04              | 70.080                                       |
| Ca_Desig_SNP2177 | [A/G]       | Ca_Desig_LG04              | 70.169                                       |
| Ca_Desig_SNP2178 | [G/C]       | Ca_Desig_LG04              | 70.274                                       |
| Ca_Desig_SNP2179 | [C/T]       | Ca_Desig_LG04              | 70.393                                       |
| Ca_Desig_SNP2180 | [T/C]       | Ca_Desig_LG04              | 70.443                                       |
| Ca_Desig_SNP2181 | [C/G]       | Ca_Desig_LG04              | 70.446                                       |
| Ca_Desig_SNP2182 | [T/C]       | Ca_Desig_LG04              | 70.540                                       |
| Ca_Desig_SNP2183 | [C/G]       | Ca_Desig_LG04              | 70.899                                       |
| Ca_Desig_SNP2184 | [A/G]       | Ca_Desig_LG04              | 70.936                                       |
| Ca_Desig_SNP2185 | [T/G]       | Ca_Desig_LG04              | 71.021                                       |
| Ca_Desig_SNP2186 | [T/G]       | Ca_Desig_LG04              | 71.147                                       |
| Ca_Desig_SNP2187 | [A/G]       | Ca_Desig_LG04              | 71.376                                       |
| Ca_Desig_SNP2188 | [A/G]       | Ca_Desig_LG04              | 71.553                                       |
| Ca_Desig_SNP2189 | [A/G]       | Ca_Desig_LG04              | 71.569                                       |
| Ca_Desig_SNP2190 | [C/T]       | Ca_Desig_LG04              | 71.605                                       |
| Ca_Desig_SNP2191 | [T/C]       | Ca_Desig_LG04              | 71.623                                       |
| Ca_Desig_SNP2192 | [A/G]       | Ca_Desig_LG04              | 71.707                                       |
| Ca_Desig_SNP2193 | [A/G]       | Ca_Desig_LG04              | 71.887                                       |
| Ca_Desig_SNP2194 | [A/G]       | Ca_Desig_LG04              | 71.938                                       |
| Ca_Desig_SNP2195 | [T/G]       | Ca_Desig_LG04              | 72.160                                       |
| Ca_Desig_SNP2196 | [T/A]       | Ca_Desig_LG04              | 72.530                                       |
| Ca_Desig_SNP2197 | [C/T]       | Ca_Desig_LG04              | 72.810                                       |
| Ca_Desig_SNP2198 | [G/T]       | Ca_Desig_LG04              | 72.861                                       |
| Ca_Desig_SNP2199 | [C/T]       | Ca_Desig_LG04              | 73.204                                       |
| Ca_Desig_SNP2200 | [A/G]       | Ca_Desig_LG04              | 73.329                                       |
| Ca_Desig_SNP2201 | [A/G]       | Ca_Desig_LG04              | 73.373                                       |
| Ca_Desig_SNP2202 | [T/C]       | Ca_Desig_LG04              | 73.466                                       |
| Ca_Desig_SNP2203 | [G/A]       | Ca_Desig_LG04              | 73.718                                       |
| Ca_Desig_SNP2204 | [C/T]       | Ca_Desig_LG04              | 73.868                                       |
| Ca_Desig_SNP2205 | [T/G]       | Ca_Desig_LG04              | 73.881                                       |

| <b>SNP IDs</b>  | <b>SNPs</b> | <b>Linkage Group (LGs)</b> | <b>Genetic positions (cM) of mapped SNPs</b> |
|-----------------|-------------|----------------------------|----------------------------------------------|
| Ca_Desi_SNP2206 | [T/A]       | <i>Ca_Desi_LG04</i>        | 73.946                                       |
| Ca_Desi_SNP2207 | [T/C]       | <i>Ca_Desi_LG04</i>        | 74.358                                       |
| Ca_Desi_SNP2208 | [C/T]       | <i>Ca_Desi_LG04</i>        | 74.383                                       |
| Ca_Desi_SNP2209 | [A/G]       | <i>Ca_Desi_LG04</i>        | 74.604                                       |
| Ca_Desi_SNP2210 | [A/T]       | <i>Ca_Desi_LG04</i>        | 74.653                                       |
| Ca_Desi_SNP2211 | [G/A]       | <i>Ca_Desi_LG04</i>        | 74.665                                       |
| Ca_Desi_SNP2212 | [G/A]       | <i>Ca_Desi_LG04</i>        | 74.730                                       |
| Ca_Desi_SNP2213 | [C/A]       | <i>Ca_Desi_LG04</i>        | 74.840                                       |
| Ca_Desi_SNP2214 | [C/T]       | <i>Ca_Desi_LG04</i>        | 74.890                                       |
| Ca_Desi_SNP2215 | [T/G]       | <i>Ca_Desi_LG04</i>        | 74.894                                       |
| Ca_Desi_SNP2216 | [A/G]       | <i>Ca_Desi_LG04</i>        | 74.932                                       |
| Ca_Desi_SNP2217 | [G/A]       | <i>Ca_Desi_LG04</i>        | 75.168                                       |
| Ca_Desi_SNP2218 | [A/C]       | <i>Ca_Desi_LG04</i>        | 75.244                                       |
| Ca_Desi_SNP2219 | [A/G]       | <i>Ca_Desi_LG04</i>        | 75.470                                       |
| Ca_Desi_SNP2220 | [C/T]       | <i>Ca_Desi_LG04</i>        | 75.669                                       |
| Ca_Desi_SNP2221 | [A/G]       | <i>Ca_Desi_LG04</i>        | 75.773                                       |
| Ca_Desi_SNP2222 | [A/G]       | <i>Ca_Desi_LG04</i>        | 76.537                                       |
| Ca_Desi_SNP2223 | [C/T]       | <i>Ca_Desi_LG04</i>        | 76.811                                       |
| Ca_Desi_SNP2224 | [C/T]       | <i>Ca_Desi_LG04</i>        | 76.908                                       |
| Ca_Desi_SNP2225 | [T/C]       | <i>Ca_Desi_LG04</i>        | 77.017                                       |
| Ca_Desi_SNP2226 | [A/G]       | <i>Ca_Desi_LG04</i>        | 77.053                                       |
| Ca_Desi_SNP2227 | [G/A]       | <i>Ca_Desi_LG04</i>        | 77.198                                       |
| Ca_Desi_SNP2228 | [G/T]       | <i>Ca_Desi_LG04</i>        | 77.211                                       |
| Ca_Desi_SNP2229 | [C/G]       | <i>Ca_Desi_LG04</i>        | 77.384                                       |
| Ca_Desi_SNP2230 | [T/C]       | <i>Ca_Desi_LG04</i>        | 77.574                                       |
| Ca_Desi_SNP2231 | [T/G]       | <i>Ca_Desi_LG04</i>        | 77.829                                       |
| Ca_Desi_SNP2232 | [G/A]       | <i>Ca_Desi_LG04</i>        | 77.847                                       |
| Ca_Desi_SNP2233 | [G/T]       | <i>Ca_Desi_LG04</i>        | 77.967                                       |
| Ca_Desi_SNP2234 | [A/T]       | <i>Ca_Desi_LG04</i>        | 77.980                                       |
| Ca_Desi_SNP2235 | [T/A]       | <i>Ca_Desi_LG04</i>        | 78.004                                       |
| Ca_Desi_SNP2236 | [T/C]       | <i>Ca_Desi_LG04</i>        | 78.180                                       |
| Ca_Desi_SNP2237 | [T/C]       | <i>Ca_Desi_LG04</i>        | 78.225                                       |
| Ca_Desi_SNP2238 | [A/G]       | <i>Ca_Desi_LG04</i>        | 78.380                                       |
| Ca_Desi_SNP2239 | [A/G]       | <i>Ca_Desi_LG04</i>        | 78.491                                       |
| Ca_Desi_SNP2240 | [C/T]       | <i>Ca_Desi_LG04</i>        | 78.547                                       |
| Ca_Desi_SNP2241 | [C/T]       | <i>Ca_Desi_LG04</i>        | 78.556                                       |
| Ca_Desi_SNP2242 | [G/A]       | <i>Ca_Desi_LG04</i>        | 78.633                                       |
| Ca_Desi_SNP2243 | [A/G]       | <i>Ca_Desi_LG04</i>        | 78.754                                       |
| Ca_Desi_SNP2244 | [G/A]       | <i>Ca_Desi_LG04</i>        | 78.773                                       |
| Ca_Desi_SNP2245 | [A/C]       | <i>Ca_Desi_LG04</i>        | 78.874                                       |
| Ca_Desi_SNP2246 | [T/A]       | <i>Ca_Desi_LG04</i>        | 79.006                                       |
| Ca_Desi_SNP2247 | [G/A]       | <i>Ca_Desi_LG04</i>        | 79.126                                       |
| Ca_Desi_SNP2248 | [G/T]       | <i>Ca_Desi_LG04</i>        | 79.225                                       |
| Ca_Desi_SNP2249 | [A/G]       | <i>Ca_Desi_LG04</i>        | 79.332                                       |
| Ca_Desi_SNP2250 | [T/C]       | <i>Ca_Desi_LG04</i>        | 79.408                                       |
| Ca_Desi_SNP2251 | [T/C]       | <i>Ca_Desi_LG04</i>        | 79.426                                       |
| Ca_Desi_SNP2252 | [A/C]       | <i>Ca_Desi_LG04</i>        | 79.852                                       |
| Ca_Desi_SNP2253 | [G/A]       | <i>Ca_Desi_LG04</i>        | 80.175                                       |



| <b>SNP IDs</b>   | <b>SNPs</b> | <b>Linkage Group (LGs)</b> | <b>Genetic positions (cM) of mapped SNPs</b> |
|------------------|-------------|----------------------------|----------------------------------------------|
| Ca_Desig_SNP2254 | [T/G]       | Ca_Desig_LG04              | 80.279                                       |
| Ca_Desig_SNP2255 | [T/G]       | Ca_Desig_LG04              | 80.313                                       |
| Ca_Desig_SNP2256 | [G/T]       | Ca_Desig_LG04              | 80.348                                       |
| Ca_Desig_SNP2257 | [T/G]       | Ca_Desig_LG04              | 80.693                                       |
| Ca_Desig_SNP2258 | [T/A]       | Ca_Desig_LG04              | 81.107                                       |
| Ca_Desig_SNP2259 | [A/G]       | Ca_Desig_LG04              | 81.309                                       |
| Ca_Desig_SNP2260 | [T/G]       | Ca_Desig_LG04              | 81.983                                       |
| Ca_Desig_SNP2261 | [A/G]       | Ca_Desig_LG04              | 82.093                                       |
| Ca_Desig_SNP2262 | [C/G]       | Ca_Desig_LG04              | 82.257                                       |
| Ca_Desig_SNP2263 | [T/C]       | Ca_Desig_LG04              | 82.790                                       |
| Ca_Desig_SNP2264 | [A/T]       | Ca_Desig_LG04              | 82.810                                       |
| Ca_Desig_SNP2265 | [G/A]       | Ca_Desig_LG04              | 82.919                                       |
| Ca_Desig_SNP2266 | [T/G]       | Ca_Desig_LG04              | 83.078                                       |
| Ca_Desig_SNP2267 | [C/A]       | Ca_Desig_LG04              | 83.977                                       |
| Ca_Desig_SNP2268 | [T/G]       | Ca_Desig_LG04              | 84.048                                       |
| Ca_Desig_SNP2269 | [A/C]       | Ca_Desig_LG04              | 84.664                                       |
| Ca_Desig_SNP2270 | [T/C]       | Ca_Desig_LG04              | 84.721                                       |
| Ca_Desig_SNP2271 | [T/G]       | Ca_Desig_LG04              | 85.365                                       |
| Ca_Desig_SNP2272 | [T/G]       | Ca_Desig_LG04              | 85.944                                       |
| Ca_Desig_SNP2273 | [T/G]       | Ca_Desig_LG04              | 85.949                                       |
| Ca_Desig_SNP2274 | [A/C]       | Ca_Desig_LG04              | 86.240                                       |
| Ca_Desig_SNP2275 | [G/C]       | Ca_Desig_LG04              | 86.290                                       |
| Ca_Desig_SNP2276 | [T/C]       | Ca_Desig_LG04              | 87.627                                       |
| Ca_Desig_SNP2277 | [A/C]       | Ca_Desig_LG04              | 91.745                                       |
| Ca_Desig_SNP2278 | [T/C]       | Ca_Desig_LG04              | 94.250                                       |
| Ca_Desig_SNP2279 | [A/C]       | Ca_Desig_LG04              | 94.548                                       |
| Ca_Desig_SNP2280 | [A/G]       | Ca_Desig_LG04              | 94.690                                       |
| Ca_Desig_SNP2281 | [A/G]       | Ca_Desig_LG04              | 95.921                                       |
| Ca_Desig_SNP2282 | [G/A]       | Ca_Desig_LG04              | 96.031                                       |
| Ca_Desig_SNP2283 | [A/C]       | Ca_Desig_LG04              | 97.782                                       |
| Ca_Desig_SNP2284 | [T/G]       | Ca_Desig_LG05              | 0.000                                        |
| Ca_Desig_SNP2285 | [T/C]       | Ca_Desig_LG05              | 2.005                                        |
| Ca_Desig_SNP2286 | [T/C]       | Ca_Desig_LG05              | 2.906                                        |
| Ca_Desig_SNP2287 | [A/G]       | Ca_Desig_LG05              | 6.592                                        |
| Ca_Desig_SNP2288 | [A/C]       | Ca_Desig_LG05              | 7.367                                        |
| Ca_Desig_SNP2289 | [A/T]       | Ca_Desig_LG05              | 8.031                                        |
| Ca_Desig_SNP2290 | [A/G]       | Ca_Desig_LG05              | 8.168                                        |
| Ca_Desig_SNP2291 | [A/C]       | Ca_Desig_LG05              | 11.729                                       |
| Ca_Desig_SNP2292 | [T/C]       | Ca_Desig_LG05              | 11.736                                       |
| Ca_Desig_SNP2293 | [G/A]       | Ca_Desig_LG05              | 11.945                                       |
| Ca_Desig_SNP2294 | [A/C]       | Ca_Desig_LG05              | 12.308                                       |
| Ca_Desig_SNP2295 | [T/A]       | Ca_Desig_LG05              | 13.330                                       |
| Ca_Desig_SNP2296 | [A/C]       | Ca_Desig_LG05              | 14.077                                       |
| Ca_Desig_SNP2297 | [T/C]       | Ca_Desig_LG05              | 14.410                                       |
| Ca_Desig_SNP2298 | [A/G]       | Ca_Desig_LG05              | 14.439                                       |
| Ca_Desig_SNP2299 | [A/T]       | Ca_Desig_LG05              | 14.800                                       |
| Ca_Desig_SNP2300 | [C/G]       | Ca_Desig_LG05              | 14.947                                       |
| Ca_Desig_SNP2301 | [T/G]       | Ca_Desig_LG05              | 15.061                                       |

| <b>SNP IDs</b>  | <b>SNPs</b> | <b>Linkage Group (LGs)</b> | <b>Genetic positions (cM) of mapped SNPs</b> |
|-----------------|-------------|----------------------------|----------------------------------------------|
| Ca_Desi_SNP2302 | [T/C]       | <i>Ca_Desi_LG05</i>        | 15.267                                       |
| Ca_Desi_SNP2303 | [A/T]       | <i>Ca_Desi_LG05</i>        | 15.634                                       |
| Ca_Desi_SNP2304 | [T/C]       | <i>Ca_Desi_LG05</i>        | 15.947                                       |
| Ca_Desi_SNP2305 | [T/A]       | <i>Ca_Desi_LG05</i>        | 15.994                                       |
| Ca_Desi_SNP2306 | [T/C]       | <i>Ca_Desi_LG05</i>        | 16.773                                       |
| Ca_Desi_SNP2307 | [C/T]       | <i>Ca_Desi_LG05</i>        | 16.975                                       |
| Ca_Desi_SNP2308 | [C/T]       | <i>Ca_Desi_LG05</i>        | 17.521                                       |
| Ca_Desi_SNP2309 | [T/C]       | <i>Ca_Desi_LG05</i>        | 18.122                                       |
| Ca_Desi_SNP2310 | [T/C]       | <i>Ca_Desi_LG05</i>        | 18.201                                       |
| Ca_Desi_SNP2311 | [T/C]       | <i>Ca_Desi_LG05</i>        | 18.461                                       |
| Ca_Desi_SNP2312 | [G/A]       | <i>Ca_Desi_LG05</i>        | 18.515                                       |
| Ca_Desi_SNP2313 | [C/T]       | <i>Ca_Desi_LG05</i>        | 18.744                                       |
| Ca_Desi_SNP2314 | [A/G]       | <i>Ca_Desi_LG05</i>        | 18.990                                       |
| Ca_Desi_SNP2315 | [T/C]       | <i>Ca_Desi_LG05</i>        | 19.374                                       |
| Ca_Desi_SNP2316 | [A/G]       | <i>Ca_Desi_LG05</i>        | 19.377                                       |
| Ca_Desi_SNP2317 | [T/G]       | <i>Ca_Desi_LG05</i>        | 20.006                                       |
| Ca_Desi_SNP2318 | [A/G]       | <i>Ca_Desi_LG05</i>        | 20.039                                       |
| Ca_Desi_SNP2319 | [C/T]       | <i>Ca_Desi_LG05</i>        | 20.102                                       |
| Ca_Desi_SNP2320 | [T/C]       | <i>Ca_Desi_LG05</i>        | 20.388                                       |
| Ca_Desi_SNP2321 | [A/G]       | <i>Ca_Desi_LG05</i>        | 20.476                                       |
| Ca_Desi_SNP2322 | [C/T]       | <i>Ca_Desi_LG05</i>        | 20.608                                       |
| Ca_Desi_SNP2323 | [A/G]       | <i>Ca_Desi_LG05</i>        | 20.810                                       |
| Ca_Desi_SNP2324 | [C/T]       | <i>Ca_Desi_LG05</i>        | 21.302                                       |
| Ca_Desi_SNP2325 | [A/G]       | <i>Ca_Desi_LG05</i>        | 21.626                                       |
| Ca_Desi_SNP2326 | [C/T]       | <i>Ca_Desi_LG05</i>        | 21.885                                       |
| Ca_Desi_SNP2327 | [A/G]       | <i>Ca_Desi_LG05</i>        | 22.069                                       |
| Ca_Desi_SNP2328 | [A/G]       | <i>Ca_Desi_LG05</i>        | 22.091                                       |
| Ca_Desi_SNP2329 | [A/C]       | <i>Ca_Desi_LG05</i>        | 22.126                                       |
| Ca_Desi_SNP2330 | [A/G]       | <i>Ca_Desi_LG05</i>        | 22.612                                       |
| Ca_Desi_SNP2331 | [C/T]       | <i>Ca_Desi_LG05</i>        | 22.874                                       |
| Ca_Desi_SNP2332 | [G/T]       | <i>Ca_Desi_LG05</i>        | 23.046                                       |
| Ca_Desi_SNP2333 | [A/T]       | <i>Ca_Desi_LG05</i>        | 23.367                                       |
| Ca_Desi_SNP2334 | [T/C]       | <i>Ca_Desi_LG05</i>        | 23.683                                       |
| Ca_Desi_SNP2335 | [T/G]       | <i>Ca_Desi_LG05</i>        | 23.744                                       |
| Ca_Desi_SNP2336 | [T/C]       | <i>Ca_Desi_LG05</i>        | 23.792                                       |
| Ca_Desi_SNP2337 | [T/A]       | <i>Ca_Desi_LG05</i>        | 23.805                                       |
| Ca_Desi_SNP2338 | [C/G]       | <i>Ca_Desi_LG05</i>        | 24.875                                       |
| Ca_Desi_SNP2339 | [T/C]       | <i>Ca_Desi_LG05</i>        | 25.012                                       |
| Ca_Desi_SNP2340 | [A/C]       | <i>Ca_Desi_LG05</i>        | 25.029                                       |
| Ca_Desi_SNP2341 | [C/T]       | <i>Ca_Desi_LG05</i>        | 25.833                                       |
| Ca_Desi_SNP2342 | [A/G]       | <i>Ca_Desi_LG05</i>        | 25.834                                       |
| Ca_Desi_SNP2343 | [A/G]       | <i>Ca_Desi_LG05</i>        | 25.948                                       |
| Ca_Desi_SNP2344 | [G/A]       | <i>Ca_Desi_LG05</i>        | 26.237                                       |
| Ca_Desi_SNP2345 | [A/C]       | <i>Ca_Desi_LG05</i>        | 26.679                                       |
| Ca_Desi_SNP2346 | [G/A]       | <i>Ca_Desi_LG05</i>        | 26.766                                       |
| Ca_Desi_SNP2347 | [A/G]       | <i>Ca_Desi_LG05</i>        | 26.913                                       |
| Ca_Desi_SNP2348 | [T/G]       | <i>Ca_Desi_LG05</i>        | 27.507                                       |
| Ca_Desi_SNP2349 | [A/G]       | <i>Ca_Desi_LG05</i>        | 27.515                                       |

| <b>SNP IDs</b>   | <b>SNPs</b> | <b>Linkage Group (LGs)</b> | <b>Genetic positions (cM) of mapped SNPs</b> |
|------------------|-------------|----------------------------|----------------------------------------------|
| Ca_Desig_SNP2350 | [G/A]       | Ca_Desig_LG05              | 27.620                                       |
| Ca_Desig_SNP2351 | [A/C]       | Ca_Desig_LG05              | 27.755                                       |
| Ca_Desig_SNP2352 | [G/A]       | Ca_Desig_LG05              | 27.865                                       |
| Ca_Desig_SNP2353 | [T/G]       | Ca_Desig_LG05              | 28.042                                       |
| Ca_Desig_SNP2354 | [C/T]       | Ca_Desig_LG05              | 28.115                                       |
| Ca_Desig_SNP2355 | [A/T]       | Ca_Desig_LG05              | 28.564                                       |
| Ca_Desig_SNP2356 | [T/G]       | Ca_Desig_LG05              | 28.659                                       |
| Ca_Desig_SNP2357 | [C/T]       | Ca_Desig_LG05              | 29.214                                       |
| Ca_Desig_SNP2358 | [A/G]       | Ca_Desig_LG05              | 29.997                                       |
| Ca_Desig_SNP2359 | [T/A]       | Ca_Desig_LG05              | 30.007                                       |
| Ca_Desig_SNP2360 | [T/A]       | Ca_Desig_LG05              | 30.039                                       |
| Ca_Desig_SNP2361 | [G/T]       | Ca_Desig_LG05              | 31.332                                       |
| Ca_Desig_SNP2362 | [T/C]       | Ca_Desig_LG05              | 31.552                                       |
| Ca_Desig_SNP2363 | [C/A]       | Ca_Desig_LG05              | 32.027                                       |
| Ca_Desig_SNP2364 | [T/G]       | Ca_Desig_LG05              | 32.574                                       |
| Ca_Desig_SNP2365 | [A/T]       | Ca_Desig_LG05              | 33.214                                       |
| Ca_Desig_SNP2366 | [G/A]       | Ca_Desig_LG05              | 33.498                                       |
| Ca_Desig_SNP2367 | [A/C]       | Ca_Desig_LG05              | 33.777                                       |
| Ca_Desig_SNP2368 | [A/G]       | Ca_Desig_LG05              | 33.814                                       |
| Ca_Desig_SNP2369 | [C/T]       | Ca_Desig_LG05              | 34.433                                       |
| Ca_Desig_SNP2370 | [C/G]       | Ca_Desig_LG05              | 34.453                                       |
| Ca_Desig_SNP2371 | [A/C]       | Ca_Desig_LG05              | 34.668                                       |
| Ca_Desig_SNP2372 | [G/T]       | Ca_Desig_LG05              | 34.704                                       |
| Ca_Desig_SNP2373 | [T/C]       | Ca_Desig_LG05              | 34.902                                       |
| Ca_Desig_SNP2374 | [G/T]       | Ca_Desig_LG05              | 34.985                                       |
| Ca_Desig_SNP2375 | [T/C]       | Ca_Desig_LG05              | 35.008                                       |
| Ca_Desig_SNP2376 | [G/C]       | Ca_Desig_LG05              | 35.011                                       |
| Ca_Desig_SNP2377 | [C/G]       | Ca_Desig_LG05              | 35.250                                       |
| Ca_Desig_SNP2378 | [A/C]       | Ca_Desig_LG05              | 35.404                                       |
| Ca_Desig_SNP2379 | [C/T]       | Ca_Desig_LG05              | 35.604                                       |
| Ca_Desig_SNP2380 | [G/A]       | Ca_Desig_LG05              | 35.638                                       |
| Ca_Desig_SNP2381 | [A/G]       | Ca_Desig_LG05              | 35.649                                       |
| Ca_Desig_SNP2382 | [G/T]       | Ca_Desig_LG05              | 35.968                                       |
| Ca_Desig_SNP2383 | [T/C]       | Ca_Desig_LG05              | 36.068                                       |
| Ca_Desig_SNP2384 | [T/C]       | Ca_Desig_LG05              | 36.106                                       |
| Ca_Desig_SNP2385 | [C/T]       | Ca_Desig_LG05              | 36.889                                       |
| Ca_Desig_SNP2386 | [T/G]       | Ca_Desig_LG05              | 36.895                                       |
| Ca_Desig_SNP2387 | [G/A]       | Ca_Desig_LG05              | 36.943                                       |
| Ca_Desig_SNP2388 | [A/C]       | Ca_Desig_LG05              | 37.002                                       |
| Ca_Desig_SNP2389 | [A/C]       | Ca_Desig_LG05              | 37.108                                       |
| Ca_Desig_SNP2390 | [T/C]       | Ca_Desig_LG05              | 37.189                                       |
| Ca_Desig_SNP2391 | [C/T]       | Ca_Desig_LG05              | 37.305                                       |
| Ca_Desig_SNP2392 | [C/T]       | Ca_Desig_LG05              | 37.314                                       |
| Ca_Desig_SNP2393 | [T/G]       | Ca_Desig_LG05              | 37.445                                       |
| Ca_Desig_SNP2394 | [A/G]       | Ca_Desig_LG05              | 37.901                                       |
| Ca_Desig_SNP2395 | [T/A]       | Ca_Desig_LG05              | 37.996                                       |
| Ca_Desig_SNP2396 | [C/A]       | Ca_Desig_LG05              | 38.152                                       |
| Ca_Desig_SNP2397 | [T/G]       | Ca_Desig_LG05              | 38.257                                       |

| <b>SNP IDs</b>  | <b>SNPs</b> | <b>Linkage Group (LGs)</b> | <b>Genetic positions (cM) of mapped SNPs</b> |
|-----------------|-------------|----------------------------|----------------------------------------------|
| Ca_Desi_SNP2398 | [C/G]       | <i>Ca_Desi_LG05</i>        | 38.350                                       |
| Ca_Desi_SNP2399 | [T/G]       | <i>Ca_Desi_LG05</i>        | 38.527                                       |
| Ca_Desi_SNP2400 | [G/A]       | <i>Ca_Desi_LG05</i>        | 39.007                                       |
| Ca_Desi_SNP2401 | [T/C]       | <i>Ca_Desi_LG05</i>        | 39.380                                       |
| Ca_Desi_SNP2402 | [A/G]       | <i>Ca_Desi_LG05</i>        | 39.395                                       |
| Ca_Desi_SNP2403 | [T/G]       | <i>Ca_Desi_LG05</i>        | 39.652                                       |
| Ca_Desi_SNP2404 | [T/C]       | <i>Ca_Desi_LG05</i>        | 39.691                                       |
| Ca_Desi_SNP2405 | [C/T]       | <i>Ca_Desi_LG05</i>        | 39.882                                       |
| Ca_Desi_SNP2406 | [T/G]       | <i>Ca_Desi_LG05</i>        | 40.430                                       |
| Ca_Desi_SNP2407 | [T/C]       | <i>Ca_Desi_LG05</i>        | 40.572                                       |
| Ca_Desi_SNP2408 | [G/T]       | <i>Ca_Desi_LG05</i>        | 40.625                                       |
| Ca_Desi_SNP2409 | [A/C]       | <i>Ca_Desi_LG05</i>        | 40.937                                       |
| Ca_Desi_SNP2410 | [T/C]       | <i>Ca_Desi_LG05</i>        | 40.983                                       |
| Ca_Desi_SNP2411 | [G/C]       | <i>Ca_Desi_LG05</i>        | 41.508                                       |
| Ca_Desi_SNP2412 | [G/T]       | <i>Ca_Desi_LG05</i>        | 41.640                                       |
| Ca_Desi_SNP2413 | [A/C]       | <i>Ca_Desi_LG05</i>        | 41.930                                       |
| Ca_Desi_SNP2414 | [A/C]       | <i>Ca_Desi_LG05</i>        | 41.941                                       |
| Ca_Desi_SNP2415 | [G/A]       | <i>Ca_Desi_LG05</i>        | 41.971                                       |
| Ca_Desi_SNP2416 | [T/G]       | <i>Ca_Desi_LG05</i>        | 42.064                                       |
| Ca_Desi_SNP2417 | [C/A]       | <i>Ca_Desi_LG05</i>        | 42.238                                       |
| Ca_Desi_SNP2418 | [T/G]       | <i>Ca_Desi_LG05</i>        | 42.700                                       |
| Ca_Desi_SNP2419 | [G/A]       | <i>Ca_Desi_LG05</i>        | 43.661                                       |
| Ca_Desi_SNP2420 | [G/A]       | <i>Ca_Desi_LG05</i>        | 43.836                                       |
| Ca_Desi_SNP2421 | [A/C]       | <i>Ca_Desi_LG05</i>        | 43.993                                       |
| Ca_Desi_SNP2422 | [G/T]       | <i>Ca_Desi_LG05</i>        | 44.208                                       |
| Ca_Desi_SNP2423 | [G/T]       | <i>Ca_Desi_LG05</i>        | 44.474                                       |
| Ca_Desi_SNP2424 | [A/T]       | <i>Ca_Desi_LG05</i>        | 45.017                                       |
| Ca_Desi_SNP2425 | [T/G]       | <i>Ca_Desi_LG05</i>        | 45.090                                       |
| Ca_Desi_SNP2426 | [T/C]       | <i>Ca_Desi_LG05</i>        | 45.127                                       |
| Ca_Desi_SNP2427 | [T/C]       | <i>Ca_Desi_LG05</i>        | 45.579                                       |
| Ca_Desi_SNP2428 | [A/G]       | <i>Ca_Desi_LG05</i>        | 46.096                                       |
| Ca_Desi_SNP2429 | [C/T]       | <i>Ca_Desi_LG05</i>        | 46.430                                       |
| Ca_Desi_SNP2430 | [C/A]       | <i>Ca_Desi_LG05</i>        | 46.470                                       |
| Ca_Desi_SNP2431 | [C/T]       | <i>Ca_Desi_LG05</i>        | 46.514                                       |
| Ca_Desi_SNP2432 | [C/A]       | <i>Ca_Desi_LG05</i>        | 46.522                                       |
| Ca_Desi_SNP2433 | [A/G]       | <i>Ca_Desi_LG05</i>        | 46.535                                       |
| Ca_Desi_SNP2434 | [T/C]       | <i>Ca_Desi_LG05</i>        | 46.614                                       |
| Ca_Desi_SNP2435 | [C/T]       | <i>Ca_Desi_LG05</i>        | 46.789                                       |
| Ca_Desi_SNP2436 | [A/C]       | <i>Ca_Desi_LG05</i>        | 46.977                                       |
| Ca_Desi_SNP2437 | [C/A]       | <i>Ca_Desi_LG05</i>        | 46.991                                       |
| Ca_Desi_SNP2438 | [A/C]       | <i>Ca_Desi_LG05</i>        | 47.050                                       |
| Ca_Desi_SNP2439 | [T/G]       | <i>Ca_Desi_LG05</i>        | 47.203                                       |
| Ca_Desi_SNP2440 | [A/T]       | <i>Ca_Desi_LG05</i>        | 47.589                                       |
| Ca_Desi_SNP2441 | [A/G]       | <i>Ca_Desi_LG05</i>        | 47.792                                       |
| Ca_Desi_SNP2442 | [A/G]       | <i>Ca_Desi_LG05</i>        | 47.806                                       |
| Ca_Desi_SNP2443 | [A/G]       | <i>Ca_Desi_LG05</i>        | 48.249                                       |
| Ca_Desi_SNP2444 | [G/A]       | <i>Ca_Desi_LG05</i>        | 48.347                                       |
| Ca_Desi_SNP2445 | [T/A]       | <i>Ca_Desi_LG05</i>        | 48.659                                       |

| <b>SNP IDs</b>  | <b>SNPs</b> | <b>Linkage Group (LGs)</b> | <b>Genetic positions (cM) of mapped SNPs</b> |
|-----------------|-------------|----------------------------|----------------------------------------------|
| Ca_Desi_SNP2446 | [C/T]       | <i>Ca_Desi_LG05</i>        | 48.732                                       |
| Ca_Desi_SNP2447 | [G/A]       | <i>Ca_Desi_LG05</i>        | 48.949                                       |
| Ca_Desi_SNP2448 | [C/A]       | <i>Ca_Desi_LG05</i>        | 49.043                                       |
| Ca_Desi_SNP2449 | [C/A]       | <i>Ca_Desi_LG05</i>        | 49.632                                       |
| Ca_Desi_SNP2450 | [A/G]       | <i>Ca_Desi_LG05</i>        | 50.011                                       |
| Ca_Desi_SNP2451 | [T/C]       | <i>Ca_Desi_LG05</i>        | 50.109                                       |
| Ca_Desi_SNP2452 | [A/G]       | <i>Ca_Desi_LG05</i>        | 50.131                                       |
| Ca_Desi_SNP2453 | [A/C]       | <i>Ca_Desi_LG05</i>        | 50.337                                       |
| Ca_Desi_SNP2454 | [A/G]       | <i>Ca_Desi_LG05</i>        | 50.490                                       |
| Ca_Desi_SNP2455 | [C/T]       | <i>Ca_Desi_LG05</i>        | 50.635                                       |
| Ca_Desi_SNP2456 | [C/A]       | <i>Ca_Desi_LG05</i>        | 50.996                                       |
| Ca_Desi_SNP2457 | [G/T]       | <i>Ca_Desi_LG05</i>        | 51.409                                       |
| Ca_Desi_SNP2458 | [A/G]       | <i>Ca_Desi_LG05</i>        | 51.509                                       |
| Ca_Desi_SNP2459 | [A/G]       | <i>Ca_Desi_LG05</i>        | 51.841                                       |
| Ca_Desi_SNP2460 | [A/C]       | <i>Ca_Desi_LG05</i>        | 52.125                                       |
| Ca_Desi_SNP2461 | [T/G]       | <i>Ca_Desi_LG05</i>        | 52.239                                       |
| Ca_Desi_SNP2462 | [A/C]       | <i>Ca_Desi_LG05</i>        | 52.288                                       |
| Ca_Desi_SNP2463 | [C/A]       | <i>Ca_Desi_LG05</i>        | 52.417                                       |
| Ca_Desi_SNP2464 | [A/G]       | <i>Ca_Desi_LG05</i>        | 52.520                                       |
| Ca_Desi_SNP2465 | [T/A]       | <i>Ca_Desi_LG05</i>        | 52.987                                       |
| Ca_Desi_SNP2466 | [A/G]       | <i>Ca_Desi_LG05</i>        | 53.113                                       |
| Ca_Desi_SNP2467 | [A/G]       | <i>Ca_Desi_LG05</i>        | 53.122                                       |
| Ca_Desi_SNP2468 | [A/G]       | <i>Ca_Desi_LG05</i>        | 53.139                                       |
| Ca_Desi_SNP2469 | [G/A]       | <i>Ca_Desi_LG05</i>        | 53.336                                       |
| Ca_Desi_SNP2470 | [T/G]       | <i>Ca_Desi_LG05</i>        | 53.431                                       |
| Ca_Desi_SNP2471 | [C/T]       | <i>Ca_Desi_LG05</i>        | 53.468                                       |
| Ca_Desi_SNP2472 | [G/T]       | <i>Ca_Desi_LG05</i>        | 53.566                                       |
| Ca_Desi_SNP2473 | [A/C]       | <i>Ca_Desi_LG05</i>        | 53.576                                       |
| Ca_Desi_SNP2474 | [A/C]       | <i>Ca_Desi_LG05</i>        | 54.164                                       |
| Ca_Desi_SNP2475 | [A/G]       | <i>Ca_Desi_LG05</i>        | 55.078                                       |
| Ca_Desi_SNP2476 | [A/C]       | <i>Ca_Desi_LG05</i>        | 55.348                                       |
| Ca_Desi_SNP2477 | [A/G]       | <i>Ca_Desi_LG05</i>        | 55.537                                       |
| Ca_Desi_SNP2478 | [C/G]       | <i>Ca_Desi_LG05</i>        | 55.708                                       |
| Ca_Desi_SNP2479 | [G/A]       | <i>Ca_Desi_LG05</i>        | 55.940                                       |
| Ca_Desi_SNP2480 | [A/T]       | <i>Ca_Desi_LG05</i>        | 56.037                                       |
| Ca_Desi_SNP2481 | [A/C]       | <i>Ca_Desi_LG05</i>        | 56.450                                       |
| Ca_Desi_SNP2482 | [A/C]       | <i>Ca_Desi_LG05</i>        | 56.754                                       |
| Ca_Desi_SNP2483 | [T/C]       | <i>Ca_Desi_LG05</i>        | 56.862                                       |
| Ca_Desi_SNP2484 | [A/G]       | <i>Ca_Desi_LG05</i>        | 57.089                                       |
| Ca_Desi_SNP2485 | [A/G]       | <i>Ca_Desi_LG05</i>        | 57.220                                       |
| Ca_Desi_SNP2486 | [T/G]       | <i>Ca_Desi_LG05</i>        | 57.359                                       |
| Ca_Desi_SNP2487 | [A/G]       | <i>Ca_Desi_LG05</i>        | 57.598                                       |
| Ca_Desi_SNP2488 | [T/C]       | <i>Ca_Desi_LG05</i>        | 57.907                                       |
| Ca_Desi_SNP2489 | [T/A]       | <i>Ca_Desi_LG05</i>        | 57.987                                       |
| Ca_Desi_SNP2490 | [C/G]       | <i>Ca_Desi_LG05</i>        | 58.056                                       |
| Ca_Desi_SNP2491 | [G/T]       | <i>Ca_Desi_LG05</i>        | 58.138                                       |
| Ca_Desi_SNP2492 | [T/C]       | <i>Ca_Desi_LG05</i>        | 58.349                                       |
| Ca_Desi_SNP2493 | [T/C]       | <i>Ca_Desi_LG05</i>        | 58.382                                       |

| <b>SNP IDs</b>   | <b>SNPs</b> | <b>Linkage Group (LGs)</b> | <b>Genetic positions (cM) of mapped SNPs</b> |
|------------------|-------------|----------------------------|----------------------------------------------|
| Ca_Desig_SNP2494 | [A/G]       | Ca_Desig_LG05              | 58.522                                       |
| Ca_Desig_SNP2495 | [T/A]       | Ca_Desig_LG05              | 58.542                                       |
| Ca_Desig_SNP2496 | [A/C]       | Ca_Desig_LG05              | 58.639                                       |
| Ca_Desig_SNP2497 | [T/G]       | Ca_Desig_LG05              | 58.666                                       |
| Ca_Desig_SNP2498 | [C/T]       | Ca_Desig_LG05              | 58.877                                       |
| Ca_Desig_SNP2499 | [C/T]       | Ca_Desig_LG05              | 58.958                                       |
| Ca_Desig_SNP2500 | [A/G]       | Ca_Desig_LG05              | 59.080                                       |
| Ca_Desig_SNP2501 | [T/G]       | Ca_Desig_LG05              | 59.477                                       |
| Ca_Desig_SNP2502 | [A/G]       | Ca_Desig_LG05              | 60.009                                       |
| Ca_Desig_SNP2503 | [G/A]       | Ca_Desig_LG05              | 60.327                                       |
| Ca_Desig_SNP2504 | [A/T]       | Ca_Desig_LG05              | 60.379                                       |
| Ca_Desig_SNP2505 | [A/T]       | Ca_Desig_LG05              | 61.296                                       |
| Ca_Desig_SNP2506 | [A/G]       | Ca_Desig_LG05              | 61.498                                       |
| Ca_Desig_SNP2507 | [A/C]       | Ca_Desig_LG05              | 61.524                                       |
| Ca_Desig_SNP2508 | [G/A]       | Ca_Desig_LG05              | 62.042                                       |
| Ca_Desig_SNP2509 | [T/A]       | Ca_Desig_LG05              | 62.477                                       |
| Ca_Desig_SNP2510 | [T/G]       | Ca_Desig_LG05              | 62.621                                       |
| Ca_Desig_SNP2511 | [A/G]       | Ca_Desig_LG05              | 62.871                                       |
| Ca_Desig_SNP2512 | [G/A]       | Ca_Desig_LG05              | 62.970                                       |
| Ca_Desig_SNP2513 | [G/T]       | Ca_Desig_LG05              | 63.093                                       |
| Ca_Desig_SNP2514 | [A/G]       | Ca_Desig_LG05              | 63.503                                       |
| Ca_Desig_SNP2515 | [T/C]       | Ca_Desig_LG05              | 63.914                                       |
| Ca_Desig_SNP2516 | [T/C]       | Ca_Desig_LG05              | 64.778                                       |
| Ca_Desig_SNP2517 | [G/T]       | Ca_Desig_LG05              | 64.950                                       |
| Ca_Desig_SNP2518 | [T/G]       | Ca_Desig_LG05              | 65.084                                       |
| Ca_Desig_SNP2519 | [A/C]       | Ca_Desig_LG05              | 65.211                                       |
| Ca_Desig_SNP2520 | [T/C]       | Ca_Desig_LG05              | 65.704                                       |
| Ca_Desig_SNP2521 | [T/C]       | Ca_Desig_LG05              | 66.210                                       |
| Ca_Desig_SNP2522 | [T/C]       | Ca_Desig_LG05              | 66.340                                       |
| Ca_Desig_SNP2523 | [T/C]       | Ca_Desig_LG05              | 67.118                                       |
| Ca_Desig_SNP2524 | [A/G]       | Ca_Desig_LG05              | 67.128                                       |
| Ca_Desig_SNP2525 | [G/A]       | Ca_Desig_LG05              | 67.397                                       |
| Ca_Desig_SNP2526 | [T/C]       | Ca_Desig_LG05              | 67.550                                       |
| Ca_Desig_SNP2527 | [T/C]       | Ca_Desig_LG05              | 67.909                                       |
| Ca_Desig_SNP2528 | [A/C]       | Ca_Desig_LG05              | 68.591                                       |
| Ca_Desig_SNP2529 | [T/G]       | Ca_Desig_LG05              | 68.821                                       |
| Ca_Desig_SNP2530 | [T/G]       | Ca_Desig_LG05              | 68.973                                       |
| Ca_Desig_SNP2531 | [T/C]       | Ca_Desig_LG05              | 69.183                                       |
| Ca_Desig_SNP2532 | [A/C]       | Ca_Desig_LG05              | 69.732                                       |
| Ca_Desig_SNP2533 | [A/G]       | Ca_Desig_LG05              | 70.021                                       |
| Ca_Desig_SNP2534 | [A/C]       | Ca_Desig_LG05              | 70.210                                       |
| Ca_Desig_SNP2535 | [G/T]       | Ca_Desig_LG05              | 70.290                                       |
| Ca_Desig_SNP2536 | [T/G]       | Ca_Desig_LG05              | 70.500                                       |
| Ca_Desig_SNP2537 | [C/T]       | Ca_Desig_LG05              | 70.547                                       |
| Ca_Desig_SNP2538 | [T/G]       | Ca_Desig_LG05              | 70.600                                       |
| Ca_Desig_SNP2539 | [C/T]       | Ca_Desig_LG05              | 70.612                                       |
| Ca_Desig_SNP2540 | [C/T]       | Ca_Desig_LG05              | 70.696                                       |
| Ca_Desig_SNP2541 | [A/G]       | Ca_Desig_LG05              | 71.736                                       |

| <b>SNP IDs</b>   | <b>SNPs</b> | <b>Linkage Group (LGs)</b> | <b>Genetic positions (cM) of mapped SNPs</b> |
|------------------|-------------|----------------------------|----------------------------------------------|
| Ca_Desig_SNP2542 | [A/C]       | Ca_Desig_LG05              | 72.170                                       |
| Ca_Desig_SNP2543 | [T/G]       | Ca_Desig_LG05              | 72.439                                       |
| Ca_Desig_SNP2544 | [G/C]       | Ca_Desig_LG05              | 72.464                                       |
| Ca_Desig_SNP2545 | [G/A]       | Ca_Desig_LG05              | 72.629                                       |
| Ca_Desig_SNP2546 | [A/G]       | Ca_Desig_LG05              | 73.403                                       |
| Ca_Desig_SNP2547 | [A/G]       | Ca_Desig_LG05              | 73.479                                       |
| Ca_Desig_SNP2548 | [A/C]       | Ca_Desig_LG05              | 73.532                                       |
| Ca_Desig_SNP2549 | [C/T]       | Ca_Desig_LG05              | 74.330                                       |
| Ca_Desig_SNP2550 | [A/G]       | Ca_Desig_LG05              | 74.490                                       |
| Ca_Desig_SNP2551 | [T/C]       | Ca_Desig_LG05              | 74.829                                       |
| Ca_Desig_SNP2552 | [A/C]       | Ca_Desig_LG05              | 74.934                                       |
| Ca_Desig_SNP2553 | [A/C]       | Ca_Desig_LG05              | 75.585                                       |
| Ca_Desig_SNP2554 | [T/C]       | Ca_Desig_LG05              | 75.857                                       |
| Ca_Desig_SNP2555 | [A/C]       | Ca_Desig_LG05              | 76.213                                       |
| Ca_Desig_SNP2556 | [A/T]       | Ca_Desig_LG05              | 76.770                                       |
| Ca_Desig_SNP2557 | [G/C]       | Ca_Desig_LG05              | 76.802                                       |
| Ca_Desig_SNP2558 | [T/A]       | Ca_Desig_LG05              | 77.003                                       |
| Ca_Desig_SNP2559 | [C/A]       | Ca_Desig_LG05              | 77.188                                       |
| Ca_Desig_SNP2560 | [T/C]       | Ca_Desig_LG05              | 77.195                                       |
| Ca_Desig_SNP2561 | [T/C]       | Ca_Desig_LG05              | 77.911                                       |
| Ca_Desig_SNP2562 | [T/C]       | Ca_Desig_LG05              | 78.024                                       |
| Ca_Desig_SNP2563 | [G/A]       | Ca_Desig_LG05              | 78.207                                       |
| Ca_Desig_SNP2564 | [G/A]       | Ca_Desig_LG05              | 78.250                                       |
| Ca_Desig_SNP2565 | [T/C]       | Ca_Desig_LG05              | 79.720                                       |
| Ca_Desig_SNP2566 | [C/T]       | Ca_Desig_LG05              | 79.861                                       |
| Ca_Desig_SNP2567 | [C/G]       | Ca_Desig_LG05              | 82.027                                       |
| Ca_Desig_SNP2568 | [A/T]       | Ca_Desig_LG05              | 83.557                                       |
| Ca_Desig_SNP2569 | [A/C]       | Ca_Desig_LG05              | 84.955                                       |
| Ca_Desig_SNP2570 | [C/T]       | Ca_Desig_LG05              | 84.994                                       |
| Ca_Desig_SNP2571 | [T/C]       | Ca_Desig_LG05              | 85.313                                       |
| Ca_Desig_SNP2572 | [G/T]       | Ca_Desig_LG05              | 86.979                                       |
| Ca_Desig_SNP2573 | [G/A]       | Ca_Desig_LG05              | 89.402                                       |
| Ca_Desig_SNP2574 | [T/G]       | Ca_Desig_LG05              | 94.059                                       |
| Ca_Desig_SNP2575 | [A/C]       | Ca_Desig_LG05              | 94.069                                       |
| Ca_Desig_SNP2576 | [C/A]       | Ca_Desig_LG06              | 0.000                                        |
| Ca_Desig_SNP2577 | [A/G]       | Ca_Desig_LG06              | 0.105                                        |
| Ca_Desig_SNP2578 | [C/A]       | Ca_Desig_LG06              | 0.122                                        |
| Ca_Desig_SNP2579 | [C/G]       | Ca_Desig_LG06              | 0.565                                        |
| Ca_Desig_SNP2580 | [A/G]       | Ca_Desig_LG06              | 0.745                                        |
| Ca_Desig_SNP2581 | [A/G]       | Ca_Desig_LG06              | 3.184                                        |
| Ca_Desig_SNP2582 | [C/A]       | Ca_Desig_LG06              | 3.440                                        |
| Ca_Desig_SNP2583 | [T/G]       | Ca_Desig_LG06              | 4.550                                        |
| Ca_Desig_SNP2584 | [T/G]       | Ca_Desig_LG06              | 4.790                                        |
| Ca_Desig_SNP2585 | [A/G]       | Ca_Desig_LG06              | 5.066                                        |
| Ca_Desig_SNP2586 | [C/G]       | Ca_Desig_LG06              | 5.078                                        |
| Ca_Desig_SNP2587 | [C/T]       | Ca_Desig_LG06              | 5.448                                        |
| Ca_Desig_SNP2588 | [A/G]       | Ca_Desig_LG06              | 6.020                                        |
| Ca_Desig_SNP2589 | [A/C]       | Ca_Desig_LG06              | 6.572                                        |

| <b>SNP IDs</b>  | <b>SNPs</b> | <b>Linkage Group (LGs)</b> | <b>Genetic positions (cM) of mapped SNPs</b> |
|-----------------|-------------|----------------------------|----------------------------------------------|
| Ca_Desi_SNP2590 | [T/C]       | <i>Ca_Desi_LG06</i>        | 6.673                                        |
| Ca_Desi_SNP2591 | [A/G]       | <i>Ca_Desi_LG06</i>        | 6.868                                        |
| Ca_Desi_SNP2592 | [C/A]       | <i>Ca_Desi_LG06</i>        | 7.149                                        |
| Ca_Desi_SNP2593 | [G/T]       | <i>Ca_Desi_LG06</i>        | 7.595                                        |
| Ca_Desi_SNP2594 | [T/C]       | <i>Ca_Desi_LG06</i>        | 8.146                                        |
| Ca_Desi_SNP2595 | [A/G]       | <i>Ca_Desi_LG06</i>        | 8.328                                        |
| Ca_Desi_SNP2596 | [C/T]       | <i>Ca_Desi_LG06</i>        | 8.995                                        |
| Ca_Desi_SNP2597 | [A/G]       | <i>Ca_Desi_LG06</i>        | 9.261                                        |
| Ca_Desi_SNP2598 | [G/A]       | <i>Ca_Desi_LG06</i>        | 9.373                                        |
| Ca_Desi_SNP2599 | [C/A]       | <i>Ca_Desi_LG06</i>        | 9.581                                        |
| Ca_Desi_SNP2600 | [T/G]       | <i>Ca_Desi_LG06</i>        | 9.637                                        |
| Ca_Desi_SNP2601 | [G/T]       | <i>Ca_Desi_LG06</i>        | 9.735                                        |
| Ca_Desi_SNP2602 | [T/C]       | <i>Ca_Desi_LG06</i>        | 10.228                                       |
| Ca_Desi_SNP2603 | [T/C]       | <i>Ca_Desi_LG06</i>        | 10.295                                       |
| Ca_Desi_SNP2604 | [A/G]       | <i>Ca_Desi_LG06</i>        | 10.389                                       |
| Ca_Desi_SNP2605 | [A/C]       | <i>Ca_Desi_LG06</i>        | 10.414                                       |
| Ca_Desi_SNP2606 | [T/G]       | <i>Ca_Desi_LG06</i>        | 10.777                                       |
| Ca_Desi_SNP2607 | [T/A]       | <i>Ca_Desi_LG06</i>        | 10.924                                       |
| Ca_Desi_SNP2608 | [T/G]       | <i>Ca_Desi_LG06</i>        | 10.981                                       |
| Ca_Desi_SNP2609 | [G/A]       | <i>Ca_Desi_LG06</i>        | 11.505                                       |
| Ca_Desi_SNP2610 | [G/A]       | <i>Ca_Desi_LG06</i>        | 11.552                                       |
| Ca_Desi_SNP2611 | [A/C]       | <i>Ca_Desi_LG06</i>        | 12.101                                       |
| Ca_Desi_SNP2612 | [G/A]       | <i>Ca_Desi_LG06</i>        | 12.721                                       |
| Ca_Desi_SNP2613 | [T/C]       | <i>Ca_Desi_LG06</i>        | 12.767                                       |
| Ca_Desi_SNP2614 | [G/T]       | <i>Ca_Desi_LG06</i>        | 12.823                                       |
| Ca_Desi_SNP2615 | [A/G]       | <i>Ca_Desi_LG06</i>        | 12.966                                       |
| Ca_Desi_SNP2616 | [C/T]       | <i>Ca_Desi_LG06</i>        | 13.102                                       |
| Ca_Desi_SNP2617 | [C/T]       | <i>Ca_Desi_LG06</i>        | 13.145                                       |
| Ca_Desi_SNP2618 | [T/G]       | <i>Ca_Desi_LG06</i>        | 13.808                                       |
| Ca_Desi_SNP2619 | [A/G]       | <i>Ca_Desi_LG06</i>        | 14.051                                       |
| Ca_Desi_SNP2620 | [G/A]       | <i>Ca_Desi_LG06</i>        | 14.080                                       |
| Ca_Desi_SNP2621 | [A/C]       | <i>Ca_Desi_LG06</i>        | 14.088                                       |
| Ca_Desi_SNP2622 | [T/A]       | <i>Ca_Desi_LG06</i>        | 14.108                                       |
| Ca_Desi_SNP2623 | [A/C]       | <i>Ca_Desi_LG06</i>        | 14.222                                       |
| Ca_Desi_SNP2624 | [T/G]       | <i>Ca_Desi_LG06</i>        | 14.772                                       |
| Ca_Desi_SNP2625 | [A/G]       | <i>Ca_Desi_LG06</i>        | 14.983                                       |
| Ca_Desi_SNP2626 | [C/G]       | <i>Ca_Desi_LG06</i>        | 15.077                                       |
| Ca_Desi_SNP2627 | [A/G]       | <i>Ca_Desi_LG06</i>        | 15.173                                       |
| Ca_Desi_SNP2628 | [A/T]       | <i>Ca_Desi_LG06</i>        | 15.677                                       |
| Ca_Desi_SNP2629 | [A/G]       | <i>Ca_Desi_LG06</i>        | 15.762                                       |
| Ca_Desi_SNP2630 | [T/G]       | <i>Ca_Desi_LG06</i>        | 15.892                                       |
| Ca_Desi_SNP2631 | [T/G]       | <i>Ca_Desi_LG06</i>        | 16.022                                       |
| Ca_Desi_SNP2632 | [A/G]       | <i>Ca_Desi_LG06</i>        | 16.215                                       |
| Ca_Desi_SNP2633 | [T/C]       | <i>Ca_Desi_LG06</i>        | 16.423                                       |
| Ca_Desi_SNP2634 | [A/G]       | <i>Ca_Desi_LG06</i>        | 16.446                                       |
| Ca_Desi_SNP2635 | [A/G]       | <i>Ca_Desi_LG06</i>        | 16.515                                       |
| Ca_Desi_SNP2636 | [C/T]       | <i>Ca_Desi_LG06</i>        | 16.698                                       |
| Ca_Desi_SNP2637 | [T/A]       | <i>Ca_Desi_LG06</i>        | 16.735                                       |



| <b>SNP IDs</b>   | <b>SNPs</b> | <b>Linkage Group (LGs)</b> | <b>Genetic positions (cM) of mapped SNPs</b> |
|------------------|-------------|----------------------------|----------------------------------------------|
| Ca_Desig_SNP2638 | [G/A]       | Ca_Desig_LG06              | 16.891                                       |
| Ca_Desig_SNP2639 | [A/T]       | Ca_Desig_LG06              | 16.974                                       |
| Ca_Desig_SNP2640 | [T/C]       | Ca_Desig_LG06              | 16.987                                       |
| Ca_Desig_SNP2641 | [T/G]       | Ca_Desig_LG06              | 17.034                                       |
| Ca_Desig_SNP2642 | [A/T]       | Ca_Desig_LG06              | 17.263                                       |
| Ca_Desig_SNP2643 | [A/G]       | Ca_Desig_LG06              | 17.679                                       |
| Ca_Desig_SNP2644 | [C/A]       | Ca_Desig_LG06              | 18.083                                       |
| Ca_Desig_SNP2645 | [C/T]       | Ca_Desig_LG06              | 18.170                                       |
| Ca_Desig_SNP2646 | [C/A]       | Ca_Desig_LG06              | 18.197                                       |
| Ca_Desig_SNP2647 | [T/C]       | Ca_Desig_LG06              | 18.372                                       |
| Ca_Desig_SNP2648 | [A/G]       | Ca_Desig_LG06              | 18.788                                       |
| Ca_Desig_SNP2649 | [A/C]       | Ca_Desig_LG06              | 18.808                                       |
| Ca_Desig_SNP2650 | [T/C]       | Ca_Desig_LG06              | 18.812                                       |
| Ca_Desig_SNP2651 | [C/T]       | Ca_Desig_LG06              | 18.818                                       |
| Ca_Desig_SNP2652 | [G/A]       | Ca_Desig_LG06              | 18.822                                       |
| Ca_Desig_SNP2653 | [C/T]       | Ca_Desig_LG06              | 18.838                                       |
| Ca_Desig_SNP2654 | [A/G]       | Ca_Desig_LG06              | 19.128                                       |
| Ca_Desig_SNP2655 | [A/C]       | Ca_Desig_LG06              | 19.290                                       |
| Ca_Desig_SNP2656 | [C/T]       | Ca_Desig_LG06              | 19.483                                       |
| Ca_Desig_SNP2657 | [A/C]       | Ca_Desig_LG06              | 19.873                                       |
| Ca_Desig_SNP2658 | [C/G]       | Ca_Desig_LG06              | 19.941                                       |
| Ca_Desig_SNP2659 | [T/G]       | Ca_Desig_LG06              | 20.284                                       |
| Ca_Desig_SNP2660 | [T/C]       | Ca_Desig_LG06              | 20.435                                       |
| Ca_Desig_SNP2661 | [A/T]       | Ca_Desig_LG06              | 20.481                                       |
| Ca_Desig_SNP2662 | [C/A]       | Ca_Desig_LG06              | 20.848                                       |
| Ca_Desig_SNP2663 | [A/G]       | Ca_Desig_LG06              | 21.060                                       |
| Ca_Desig_SNP2664 | [A/G]       | Ca_Desig_LG06              | 21.227                                       |
| Ca_Desig_SNP2665 | [A/G]       | Ca_Desig_LG06              | 21.265                                       |
| Ca_Desig_SNP2666 | [G/T]       | Ca_Desig_LG06              | 21.309                                       |
| Ca_Desig_SNP2667 | [G/C]       | Ca_Desig_LG06              | 21.373                                       |
| Ca_Desig_SNP2668 | [A/C]       | Ca_Desig_LG06              | 21.409                                       |
| Ca_Desig_SNP2669 | [T/G]       | Ca_Desig_LG06              | 21.547                                       |
| Ca_Desig_SNP2670 | [T/C]       | Ca_Desig_LG06              | 21.913                                       |
| Ca_Desig_SNP2671 | [T/G]       | Ca_Desig_LG06              | 22.052                                       |
| Ca_Desig_SNP2672 | [T/A]       | Ca_Desig_LG06              | 22.242                                       |
| Ca_Desig_SNP2673 | [A/G]       | Ca_Desig_LG06              | 22.246                                       |
| Ca_Desig_SNP2674 | [A/C]       | Ca_Desig_LG06              | 22.421                                       |
| Ca_Desig_SNP2675 | [C/T]       | Ca_Desig_LG06              | 22.486                                       |
| Ca_Desig_SNP2676 | [T/A]       | Ca_Desig_LG06              | 22.672                                       |
| Ca_Desig_SNP2677 | [T/A]       | Ca_Desig_LG06              | 23.419                                       |
| Ca_Desig_SNP2678 | [A/G]       | Ca_Desig_LG06              | 23.454                                       |
| Ca_Desig_SNP2679 | [A/C]       | Ca_Desig_LG06              | 23.931                                       |
| Ca_Desig_SNP2680 | [T/A]       | Ca_Desig_LG06              | 24.029                                       |
| Ca_Desig_SNP2681 | [C/A]       | Ca_Desig_LG06              | 24.040                                       |
| Ca_Desig_SNP2682 | [T/G]       | Ca_Desig_LG06              | 24.259                                       |
| Ca_Desig_SNP2683 | [T/G]       | Ca_Desig_LG06              | 24.392                                       |
| Ca_Desig_SNP2684 | [T/G]       | Ca_Desig_LG06              | 24.410                                       |
| Ca_Desig_SNP2685 | [T/G]       | Ca_Desig_LG06              | 24.419                                       |

| <b>SNP IDs</b>  | <b>SNPs</b> | <b>Linkage Group (LGs)</b> | <b>Genetic positions (cM) of mapped SNPs</b> |
|-----------------|-------------|----------------------------|----------------------------------------------|
| Ca_Desi_SNP2686 | [T/C]       | <i>Ca_Desi_LG06</i>        | 24.585                                       |
| Ca_Desi_SNP2687 | [A/G]       | <i>Ca_Desi_LG06</i>        | 24.661                                       |
| Ca_Desi_SNP2688 | [C/T]       | <i>Ca_Desi_LG06</i>        | 24.683                                       |
| Ca_Desi_SNP2689 | [A/C]       | <i>Ca_Desi_LG06</i>        | 24.697                                       |
| Ca_Desi_SNP2690 | [C/T]       | <i>Ca_Desi_LG06</i>        | 24.809                                       |
| Ca_Desi_SNP2691 | [G/T]       | <i>Ca_Desi_LG06</i>        | 25.258                                       |
| Ca_Desi_SNP2692 | [T/A]       | <i>Ca_Desi_LG06</i>        | 25.388                                       |
| Ca_Desi_SNP2693 | [T/C]       | <i>Ca_Desi_LG06</i>        | 25.403                                       |
| Ca_Desi_SNP2694 | [A/C]       | <i>Ca_Desi_LG06</i>        | 25.616                                       |
| Ca_Desi_SNP2695 | [A/C]       | <i>Ca_Desi_LG06</i>        | 25.677                                       |
| Ca_Desi_SNP2696 | [C/T]       | <i>Ca_Desi_LG06</i>        | 25.767                                       |
| Ca_Desi_SNP2697 | [C/T]       | <i>Ca_Desi_LG06</i>        | 25.799                                       |
| Ca_Desi_SNP2698 | [G/C]       | <i>Ca_Desi_LG06</i>        | 25.853                                       |
| Ca_Desi_SNP2699 | [T/C]       | <i>Ca_Desi_LG06</i>        | 25.953                                       |
| Ca_Desi_SNP2700 | [A/G]       | <i>Ca_Desi_LG06</i>        | 26.189                                       |
| Ca_Desi_SNP2701 | [A/G]       | <i>Ca_Desi_LG06</i>        | 26.211                                       |
| Ca_Desi_SNP2702 | [T/G]       | <i>Ca_Desi_LG06</i>        | 26.239                                       |
| Ca_Desi_SNP2703 | [C/T]       | <i>Ca_Desi_LG06</i>        | 26.285                                       |
| Ca_Desi_SNP2704 | [C/T]       | <i>Ca_Desi_LG06</i>        | 26.383                                       |
| Ca_Desi_SNP2705 | [G/A]       | <i>Ca_Desi_LG06</i>        | 26.630                                       |
| Ca_Desi_SNP2706 | [A/G]       | <i>Ca_Desi_LG06</i>        | 26.807                                       |
| Ca_Desi_SNP2707 | [T/G]       | <i>Ca_Desi_LG06</i>        | 26.880                                       |
| Ca_Desi_SNP2708 | [T/G]       | <i>Ca_Desi_LG06</i>        | 26.954                                       |
| Ca_Desi_SNP2709 | [A/C]       | <i>Ca_Desi_LG06</i>        | 26.966                                       |
| Ca_Desi_SNP2710 | [A/G]       | <i>Ca_Desi_LG06</i>        | 27.064                                       |
| Ca_Desi_SNP2711 | [T/G]       | <i>Ca_Desi_LG06</i>        | 27.254                                       |
| Ca_Desi_SNP2712 | [C/T]       | <i>Ca_Desi_LG06</i>        | 27.556                                       |
| Ca_Desi_SNP2713 | [C/T]       | <i>Ca_Desi_LG06</i>        | 27.884                                       |
| Ca_Desi_SNP2714 | [C/A]       | <i>Ca_Desi_LG06</i>        | 28.375                                       |
| Ca_Desi_SNP2715 | [A/C]       | <i>Ca_Desi_LG06</i>        | 28.810                                       |
| Ca_Desi_SNP2716 | [T/G]       | <i>Ca_Desi_LG06</i>        | 28.980                                       |
| Ca_Desi_SNP2717 | [C/A]       | <i>Ca_Desi_LG06</i>        | 29.138                                       |
| Ca_Desi_SNP2718 | [G/A]       | <i>Ca_Desi_LG06</i>        | 29.484                                       |
| Ca_Desi_SNP2719 | [A/C]       | <i>Ca_Desi_LG06</i>        | 29.517                                       |
| Ca_Desi_SNP2720 | [G/A]       | <i>Ca_Desi_LG06</i>        | 29.608                                       |
| Ca_Desi_SNP2721 | [C/A]       | <i>Ca_Desi_LG06</i>        | 29.628                                       |
| Ca_Desi_SNP2722 | [A/C]       | <i>Ca_Desi_LG06</i>        | 29.665                                       |
| Ca_Desi_SNP2723 | [G/C]       | <i>Ca_Desi_LG06</i>        | 29.855                                       |
| Ca_Desi_SNP2724 | [G/A]       | <i>Ca_Desi_LG06</i>        | 29.875                                       |
| Ca_Desi_SNP2725 | [G/A]       | <i>Ca_Desi_LG06</i>        | 30.145                                       |
| Ca_Desi_SNP2726 | [G/A]       | <i>Ca_Desi_LG06</i>        | 30.173                                       |
| Ca_Desi_SNP2727 | [C/A]       | <i>Ca_Desi_LG06</i>        | 30.336                                       |
| Ca_Desi_SNP2728 | [C/T]       | <i>Ca_Desi_LG06</i>        | 30.577                                       |
| Ca_Desi_SNP2729 | [T/A]       | <i>Ca_Desi_LG06</i>        | 30.961                                       |
| Ca_Desi_SNP2730 | [C/G]       | <i>Ca_Desi_LG06</i>        | 31.301                                       |
| Ca_Desi_SNP2731 | [A/G]       | <i>Ca_Desi_LG06</i>        | 31.317                                       |
| Ca_Desi_SNP2732 | [C/T]       | <i>Ca_Desi_LG06</i>        | 31.381                                       |
| Ca_Desi_SNP2733 | [T/A]       | <i>Ca_Desi_LG06</i>        | 31.403                                       |

| <b>SNP IDs</b>  | <b>SNPs</b> | <b>Linkage Group (LGs)</b> | <b>Genetic positions (cM) of mapped SNPs</b> |
|-----------------|-------------|----------------------------|----------------------------------------------|
| Ca_Desi_SNP2734 | [G/C]       | <i>Ca_Desi_LG06</i>        | 31.413                                       |
| Ca_Desi_SNP2735 | [T/C]       | <i>Ca_Desi_LG06</i>        | 31.443                                       |
| Ca_Desi_SNP2736 | [C/T]       | <i>Ca_Desi_LG06</i>        | 31.646                                       |
| Ca_Desi_SNP2737 | [C/T]       | <i>Ca_Desi_LG06</i>        | 31.649                                       |
| Ca_Desi_SNP2738 | [G/C]       | <i>Ca_Desi_LG06</i>        | 31.935                                       |
| Ca_Desi_SNP2739 | [A/C]       | <i>Ca_Desi_LG06</i>        | 32.148                                       |
| Ca_Desi_SNP2740 | [T/A]       | <i>Ca_Desi_LG06</i>        | 32.308                                       |
| Ca_Desi_SNP2741 | [A/C]       | <i>Ca_Desi_LG06</i>        | 32.316                                       |
| Ca_Desi_SNP2742 | [C/A]       | <i>Ca_Desi_LG06</i>        | 32.950                                       |
| Ca_Desi_SNP2743 | [T/C]       | <i>Ca_Desi_LG06</i>        | 33.070                                       |
| Ca_Desi_SNP2744 | [T/C]       | <i>Ca_Desi_LG06</i>        | 33.278                                       |
| Ca_Desi_SNP2745 | [G/A]       | <i>Ca_Desi_LG06</i>        | 33.320                                       |
| Ca_Desi_SNP2746 | [C/T]       | <i>Ca_Desi_LG06</i>        | 33.462                                       |
| Ca_Desi_SNP2747 | [G/A]       | <i>Ca_Desi_LG06</i>        | 33.583                                       |
| Ca_Desi_SNP2748 | [A/C]       | <i>Ca_Desi_LG06</i>        | 34.054                                       |
| Ca_Desi_SNP2749 | [C/T]       | <i>Ca_Desi_LG06</i>        | 34.525                                       |
| Ca_Desi_SNP2750 | [T/G]       | <i>Ca_Desi_LG06</i>        | 34.712                                       |
| Ca_Desi_SNP2751 | [A/C]       | <i>Ca_Desi_LG06</i>        | 34.823                                       |
| Ca_Desi_SNP2752 | [T/A]       | <i>Ca_Desi_LG06</i>        | 34.856                                       |
| Ca_Desi_SNP2753 | [A/C]       | <i>Ca_Desi_LG06</i>        | 35.055                                       |
| Ca_Desi_SNP2754 | [T/G]       | <i>Ca_Desi_LG06</i>        | 35.444                                       |
| Ca_Desi_SNP2755 | [A/C]       | <i>Ca_Desi_LG06</i>        | 35.541                                       |
| Ca_Desi_SNP2756 | [T/C]       | <i>Ca_Desi_LG06</i>        | 35.860                                       |
| Ca_Desi_SNP2757 | [G/T]       | <i>Ca_Desi_LG06</i>        | 35.894                                       |
| Ca_Desi_SNP2758 | [A/C]       | <i>Ca_Desi_LG06</i>        | 35.988                                       |
| Ca_Desi_SNP2759 | [G/T]       | <i>Ca_Desi_LG06</i>        | 35.989                                       |
| Ca_Desi_SNP2760 | [C/T]       | <i>Ca_Desi_LG06</i>        | 36.576                                       |
| Ca_Desi_SNP2761 | [T/C]       | <i>Ca_Desi_LG06</i>        | 36.685                                       |
| Ca_Desi_SNP2762 | [A/G]       | <i>Ca_Desi_LG06</i>        | 36.868                                       |
| Ca_Desi_SNP2763 | [G/A]       | <i>Ca_Desi_LG06</i>        | 37.069                                       |
| Ca_Desi_SNP2764 | [T/C]       | <i>Ca_Desi_LG06</i>        | 37.103                                       |
| Ca_Desi_SNP2765 | [A/G]       | <i>Ca_Desi_LG06</i>        | 37.199                                       |
| Ca_Desi_SNP2766 | [C/T]       | <i>Ca_Desi_LG06</i>        | 37.225                                       |
| Ca_Desi_SNP2767 | [G/A]       | <i>Ca_Desi_LG06</i>        | 37.517                                       |
| Ca_Desi_SNP2768 | [A/G]       | <i>Ca_Desi_LG06</i>        | 37.574                                       |
| Ca_Desi_SNP2769 | [C/T]       | <i>Ca_Desi_LG06</i>        | 37.587                                       |
| Ca_Desi_SNP2770 | [C/G]       | <i>Ca_Desi_LG06</i>        | 37.703                                       |
| Ca_Desi_SNP2771 | [C/G]       | <i>Ca_Desi_LG06</i>        | 37.828                                       |
| Ca_Desi_SNP2772 | [A/T]       | <i>Ca_Desi_LG06</i>        | 37.987                                       |
| Ca_Desi_SNP2773 | [T/A]       | <i>Ca_Desi_LG06</i>        | 38.109                                       |
| Ca_Desi_SNP2774 | [G/A]       | <i>Ca_Desi_LG06</i>        | 38.353                                       |
| Ca_Desi_SNP2775 | [A/G]       | <i>Ca_Desi_LG06</i>        | 38.398                                       |
| Ca_Desi_SNP2776 | [C/A]       | <i>Ca_Desi_LG06</i>        | 38.707                                       |
| Ca_Desi_SNP2777 | [T/C]       | <i>Ca_Desi_LG06</i>        | 38.738                                       |
| Ca_Desi_SNP2778 | [T/C]       | <i>Ca_Desi_LG06</i>        | 39.011                                       |
| Ca_Desi_SNP2779 | [C/T]       | <i>Ca_Desi_LG06</i>        | 39.014                                       |
| Ca_Desi_SNP2780 | [G/A]       | <i>Ca_Desi_LG06</i>        | 39.117                                       |
| Ca_Desi_SNP2781 | [A/C]       | <i>Ca_Desi_LG06</i>        | 39.450                                       |

| <b>SNP IDs</b>  | <b>SNPs</b> | <b>Linkage Group (LGs)</b> | <b>Genetic positions (cM) of mapped SNPs</b> |
|-----------------|-------------|----------------------------|----------------------------------------------|
| Ca_Desi_SNP2782 | [G/A]       | <i>Ca_Desi_LG06</i>        | 39.676                                       |
| Ca_Desi_SNP2783 | [T/A]       | <i>Ca_Desi_LG06</i>        | 39.819                                       |
| Ca_Desi_SNP2784 | [T/G]       | <i>Ca_Desi_LG06</i>        | 40.017                                       |
| Ca_Desi_SNP2785 | [C/T]       | <i>Ca_Desi_LG06</i>        | 40.017                                       |
| Ca_Desi_SNP2786 | [C/T]       | <i>Ca_Desi_LG06</i>        | 40.360                                       |
| Ca_Desi_SNP2787 | [A/G]       | <i>Ca_Desi_LG06</i>        | 40.789                                       |
| Ca_Desi_SNP2788 | [G/T]       | <i>Ca_Desi_LG06</i>        | 40.881                                       |
| Ca_Desi_SNP2789 | [T/C]       | <i>Ca_Desi_LG06</i>        | 41.035                                       |
| Ca_Desi_SNP2790 | [A/G]       | <i>Ca_Desi_LG06</i>        | 41.075                                       |
| Ca_Desi_SNP2791 | [T/C]       | <i>Ca_Desi_LG06</i>        | 41.088                                       |
| Ca_Desi_SNP2792 | [T/A]       | <i>Ca_Desi_LG06</i>        | 41.264                                       |
| Ca_Desi_SNP2793 | [T/C]       | <i>Ca_Desi_LG06</i>        | 41.490                                       |
| Ca_Desi_SNP2794 | [C/A]       | <i>Ca_Desi_LG06</i>        | 41.551                                       |
| Ca_Desi_SNP2795 | [C/A]       | <i>Ca_Desi_LG06</i>        | 41.576                                       |
| Ca_Desi_SNP2796 | [C/T]       | <i>Ca_Desi_LG06</i>        | 41.817                                       |
| Ca_Desi_SNP2797 | [G/A]       | <i>Ca_Desi_LG06</i>        | 41.932                                       |
| Ca_Desi_SNP2798 | [A/G]       | <i>Ca_Desi_LG06</i>        | 42.006                                       |
| Ca_Desi_SNP2799 | [A/C]       | <i>Ca_Desi_LG06</i>        | 42.041                                       |
| Ca_Desi_SNP2800 | [G/A]       | <i>Ca_Desi_LG06</i>        | 42.168                                       |
| Ca_Desi_SNP2801 | [A/T]       | <i>Ca_Desi_LG06</i>        | 42.249                                       |
| Ca_Desi_SNP2802 | [C/T]       | <i>Ca_Desi_LG06</i>        | 42.387                                       |
| Ca_Desi_SNP2803 | [C/T]       | <i>Ca_Desi_LG06</i>        | 42.654                                       |
| Ca_Desi_SNP2804 | [G/T]       | <i>Ca_Desi_LG06</i>        | 42.714                                       |
| Ca_Desi_SNP2805 | [C/T]       | <i>Ca_Desi_LG06</i>        | 42.775                                       |
| Ca_Desi_SNP2806 | [T/G]       | <i>Ca_Desi_LG06</i>        | 42.820                                       |
| Ca_Desi_SNP2807 | [T/C]       | <i>Ca_Desi_LG06</i>        | 43.307                                       |
| Ca_Desi_SNP2808 | [A/C]       | <i>Ca_Desi_LG06</i>        | 43.414                                       |
| Ca_Desi_SNP2809 | [A/G]       | <i>Ca_Desi_LG06</i>        | 43.554                                       |
| Ca_Desi_SNP2810 | [T/C]       | <i>Ca_Desi_LG06</i>        | 43.588                                       |
| Ca_Desi_SNP2811 | [T/C]       | <i>Ca_Desi_LG06</i>        | 43.649                                       |
| Ca_Desi_SNP2812 | [T/G]       | <i>Ca_Desi_LG06</i>        | 43.679                                       |
| Ca_Desi_SNP2813 | [G/A]       | <i>Ca_Desi_LG06</i>        | 44.023                                       |
| Ca_Desi_SNP2814 | [A/G]       | <i>Ca_Desi_LG06</i>        | 44.114                                       |
| Ca_Desi_SNP2815 | [A/G]       | <i>Ca_Desi_LG06</i>        | 44.665                                       |
| Ca_Desi_SNP2816 | [T/C]       | <i>Ca_Desi_LG06</i>        | 44.774                                       |
| Ca_Desi_SNP2817 | [C/T]       | <i>Ca_Desi_LG06</i>        | 44.879                                       |
| Ca_Desi_SNP2818 | [A/C]       | <i>Ca_Desi_LG06</i>        | 44.881                                       |
| Ca_Desi_SNP2819 | [A/C]       | <i>Ca_Desi_LG06</i>        | 45.109                                       |
| Ca_Desi_SNP2820 | [T/C]       | <i>Ca_Desi_LG06</i>        | 45.170                                       |
| Ca_Desi_SNP2821 | [G/A]       | <i>Ca_Desi_LG06</i>        | 45.229                                       |
| Ca_Desi_SNP2822 | [T/C]       | <i>Ca_Desi_LG06</i>        | 45.231                                       |
| Ca_Desi_SNP2823 | [T/C]       | <i>Ca_Desi_LG06</i>        | 45.469                                       |
| Ca_Desi_SNP2824 | [G/T]       | <i>Ca_Desi_LG06</i>        | 45.490                                       |
| Ca_Desi_SNP2825 | [A/G]       | <i>Ca_Desi_LG06</i>        | 45.510                                       |
| Ca_Desi_SNP2826 | [C/T]       | <i>Ca_Desi_LG06</i>        | 45.532                                       |
| Ca_Desi_SNP2827 | [G/T]       | <i>Ca_Desi_LG06</i>        | 45.588                                       |
| Ca_Desi_SNP2828 | [T/A]       | <i>Ca_Desi_LG06</i>        | 45.683                                       |
| Ca_Desi_SNP2829 | [A/G]       | <i>Ca_Desi_LG06</i>        | 45.728                                       |

| <b>SNP IDs</b>  | <b>SNPs</b> | <b>Linkage Group (LGs)</b> | <b>Genetic positions (cM) of mapped SNPs</b> |
|-----------------|-------------|----------------------------|----------------------------------------------|
| Ca_Desi_SNP2830 | [T/C]       | <i>Ca_Desi_LG06</i>        | 45.752                                       |
| Ca_Desi_SNP2831 | [T/C]       | <i>Ca_Desi_LG06</i>        | 45.796                                       |
| Ca_Desi_SNP2832 | [T/C]       | <i>Ca_Desi_LG06</i>        | 45.857                                       |
| Ca_Desi_SNP2833 | [G/A]       | <i>Ca_Desi_LG06</i>        | 46.039                                       |
| Ca_Desi_SNP2834 | [G/A]       | <i>Ca_Desi_LG06</i>        | 46.146                                       |
| Ca_Desi_SNP2835 | [A/C]       | <i>Ca_Desi_LG06</i>        | 46.160                                       |
| Ca_Desi_SNP2836 | [A/G]       | <i>Ca_Desi_LG06</i>        | 46.577                                       |
| Ca_Desi_SNP2837 | [A/C]       | <i>Ca_Desi_LG06</i>        | 46.666                                       |
| Ca_Desi_SNP2838 | [C/T]       | <i>Ca_Desi_LG06</i>        | 46.711                                       |
| Ca_Desi_SNP2839 | [A/C]       | <i>Ca_Desi_LG06</i>        | 46.750                                       |
| Ca_Desi_SNP2840 | [A/T]       | <i>Ca_Desi_LG06</i>        | 46.780                                       |
| Ca_Desi_SNP2841 | [A/G]       | <i>Ca_Desi_LG06</i>        | 46.794                                       |
| Ca_Desi_SNP2842 | [T/A]       | <i>Ca_Desi_LG06</i>        | 46.807                                       |
| Ca_Desi_SNP2843 | [T/G]       | <i>Ca_Desi_LG06</i>        | 47.138                                       |
| Ca_Desi_SNP2844 | [G/A]       | <i>Ca_Desi_LG06</i>        | 47.667                                       |
| Ca_Desi_SNP2845 | [A/C]       | <i>Ca_Desi_LG06</i>        | 47.682                                       |
| Ca_Desi_SNP2846 | [A/T]       | <i>Ca_Desi_LG06</i>        | 47.695                                       |
| Ca_Desi_SNP2847 | [A/C]       | <i>Ca_Desi_LG06</i>        | 48.051                                       |
| Ca_Desi_SNP2848 | [A/G]       | <i>Ca_Desi_LG06</i>        | 48.306                                       |
| Ca_Desi_SNP2849 | [T/G]       | <i>Ca_Desi_LG06</i>        | 48.449                                       |
| Ca_Desi_SNP2850 | [T/C]       | <i>Ca_Desi_LG06</i>        | 48.876                                       |
| Ca_Desi_SNP2851 | [C/G]       | <i>Ca_Desi_LG06</i>        | 48.931                                       |
| Ca_Desi_SNP2852 | [A/C]       | <i>Ca_Desi_LG06</i>        | 49.123                                       |
| Ca_Desi_SNP2853 | [T/A]       | <i>Ca_Desi_LG06</i>        | 49.242                                       |
| Ca_Desi_SNP2854 | [G/A]       | <i>Ca_Desi_LG06</i>        | 49.284                                       |
| Ca_Desi_SNP2855 | [T/C]       | <i>Ca_Desi_LG06</i>        | 49.692                                       |
| Ca_Desi_SNP2856 | [G/T]       | <i>Ca_Desi_LG06</i>        | 49.796                                       |
| Ca_Desi_SNP2857 | [A/G]       | <i>Ca_Desi_LG06</i>        | 49.970                                       |
| Ca_Desi_SNP2858 | [G/C]       | <i>Ca_Desi_LG06</i>        | 50.111                                       |
| Ca_Desi_SNP2859 | [T/G]       | <i>Ca_Desi_LG06</i>        | 50.172                                       |
| Ca_Desi_SNP2860 | [C/T]       | <i>Ca_Desi_LG06</i>        | 50.698                                       |
| Ca_Desi_SNP2861 | [T/C]       | <i>Ca_Desi_LG06</i>        | 50.758                                       |
| Ca_Desi_SNP2862 | [T/C]       | <i>Ca_Desi_LG06</i>        | 50.820                                       |
| Ca_Desi_SNP2863 | [A/G]       | <i>Ca_Desi_LG06</i>        | 51.156                                       |
| Ca_Desi_SNP2864 | [A/C]       | <i>Ca_Desi_LG06</i>        | 51.292                                       |
| Ca_Desi_SNP2865 | [T/G]       | <i>Ca_Desi_LG06</i>        | 51.315                                       |
| Ca_Desi_SNP2866 | [A/G]       | <i>Ca_Desi_LG06</i>        | 51.944                                       |
| Ca_Desi_SNP2867 | [C/A]       | <i>Ca_Desi_LG06</i>        | 51.946                                       |
| Ca_Desi_SNP2868 | [A/C]       | <i>Ca_Desi_LG06</i>        | 51.965                                       |
| Ca_Desi_SNP2869 | [T/C]       | <i>Ca_Desi_LG06</i>        | 52.199                                       |
| Ca_Desi_SNP2870 | [T/C]       | <i>Ca_Desi_LG06</i>        | 52.641                                       |
| Ca_Desi_SNP2871 | [A/C]       | <i>Ca_Desi_LG06</i>        | 52.658                                       |
| Ca_Desi_SNP2872 | [G/A]       | <i>Ca_Desi_LG06</i>        | 52.909                                       |
| Ca_Desi_SNP2873 | [T/C]       | <i>Ca_Desi_LG06</i>        | 52.993                                       |
| Ca_Desi_SNP2874 | [T/C]       | <i>Ca_Desi_LG06</i>        | 53.028                                       |
| Ca_Desi_SNP2875 | [T/C]       | <i>Ca_Desi_LG06</i>        | 53.311                                       |
| Ca_Desi_SNP2876 | [C/T]       | <i>Ca_Desi_LG06</i>        | 53.400                                       |
| Ca_Desi_SNP2877 | [T/G]       | <i>Ca_Desi_LG06</i>        | 53.424                                       |

| <b>SNP IDs</b>   | <b>SNPs</b> | <b>Linkage Group (LGs)</b> | <b>Genetic positions (cM) of mapped SNPs</b> |
|------------------|-------------|----------------------------|----------------------------------------------|
| Ca_Desig_SNP2878 | [G/A]       | Ca_Desig_LG06              | 53.451                                       |
| Ca_Desig_SNP2879 | [A/C]       | Ca_Desig_LG06              | 53.479                                       |
| Ca_Desig_SNP2880 | [A/C]       | Ca_Desig_LG06              | 53.846                                       |
| Ca_Desig_SNP2881 | [T/A]       | Ca_Desig_LG06              | 54.069                                       |
| Ca_Desig_SNP2882 | [A/G]       | Ca_Desig_LG06              | 54.073                                       |
| Ca_Desig_SNP2883 | [T/C]       | Ca_Desig_LG06              | 54.109                                       |
| Ca_Desig_SNP2884 | [G/T]       | Ca_Desig_LG06              | 54.164                                       |
| Ca_Desig_SNP2885 | [A/G]       | Ca_Desig_LG06              | 54.349                                       |
| Ca_Desig_SNP2886 | [A/T]       | Ca_Desig_LG06              | 54.569                                       |
| Ca_Desig_SNP2887 | [A/C]       | Ca_Desig_LG06              | 54.625                                       |
| Ca_Desig_SNP2888 | [G/A]       | Ca_Desig_LG06              | 54.676                                       |
| Ca_Desig_SNP2889 | [A/C]       | Ca_Desig_LG06              | 54.737                                       |
| Ca_Desig_SNP2890 | [A/G]       | Ca_Desig_LG06              | 54.800                                       |
| Ca_Desig_SNP2891 | [A/G]       | Ca_Desig_LG06              | 55.013                                       |
| Ca_Desig_SNP2892 | [T/C]       | Ca_Desig_LG06              | 55.028                                       |
| Ca_Desig_SNP2893 | [T/G]       | Ca_Desig_LG06              | 55.186                                       |
| Ca_Desig_SNP2894 | [A/C]       | Ca_Desig_LG06              | 55.424                                       |
| Ca_Desig_SNP2895 | [T/G]       | Ca_Desig_LG06              | 55.864                                       |
| Ca_Desig_SNP2896 | [T/C]       | Ca_Desig_LG06              | 55.946                                       |
| Ca_Desig_SNP2897 | [T/C]       | Ca_Desig_LG06              | 56.149                                       |
| Ca_Desig_SNP2898 | [C/T]       | Ca_Desig_LG06              | 56.494                                       |
| Ca_Desig_SNP2899 | [A/C]       | Ca_Desig_LG06              | 56.508                                       |
| Ca_Desig_SNP2900 | [A/G]       | Ca_Desig_LG06              | 56.539                                       |
| Ca_Desig_SNP2901 | [G/A]       | Ca_Desig_LG06              | 56.715                                       |
| Ca_Desig_SNP2902 | [G/T]       | Ca_Desig_LG06              | 56.733                                       |
| Ca_Desig_SNP2903 | [A/C]       | Ca_Desig_LG06              | 56.755                                       |
| Ca_Desig_SNP2904 | [A/C]       | Ca_Desig_LG06              | 57.250                                       |
| Ca_Desig_SNP2905 | [C/T]       | Ca_Desig_LG06              | 57.254                                       |
| Ca_Desig_SNP2906 | [A/C]       | Ca_Desig_LG06              | 57.325                                       |
| Ca_Desig_SNP2907 | [T/G]       | Ca_Desig_LG06              | 57.422                                       |
| Ca_Desig_SNP2908 | [C/A]       | Ca_Desig_LG06              | 57.425                                       |
| Ca_Desig_SNP2909 | [A/G]       | Ca_Desig_LG06              | 57.677                                       |
| Ca_Desig_SNP2910 | [T/A]       | Ca_Desig_LG06              | 57.730                                       |
| Ca_Desig_SNP2911 | [T/A]       | Ca_Desig_LG06              | 57.871                                       |
| Ca_Desig_SNP2912 | [G/T]       | Ca_Desig_LG06              | 57.966                                       |
| Ca_Desig_SNP2913 | [A/C]       | Ca_Desig_LG06              | 58.050                                       |
| Ca_Desig_SNP2914 | [T/C]       | Ca_Desig_LG06              | 58.157                                       |
| Ca_Desig_SNP2915 | [G/T]       | Ca_Desig_LG06              | 58.644                                       |
| Ca_Desig_SNP2916 | [A/C]       | Ca_Desig_LG06              | 58.744                                       |
| Ca_Desig_SNP2917 | [T/G]       | Ca_Desig_LG06              | 58.979                                       |
| Ca_Desig_SNP2918 | [A/G]       | Ca_Desig_LG06              | 59.178                                       |
| Ca_Desig_SNP2919 | [C/T]       | Ca_Desig_LG06              | 59.362                                       |
| Ca_Desig_SNP2920 | [C/T]       | Ca_Desig_LG06              | 59.512                                       |
| Ca_Desig_SNP2921 | [T/C]       | Ca_Desig_LG06              | 59.532                                       |
| Ca_Desig_SNP2922 | [C/T]       | Ca_Desig_LG06              | 59.836                                       |
| Ca_Desig_SNP2923 | [G/A]       | Ca_Desig_LG06              | 59.900                                       |
| Ca_Desig_SNP2924 | [T/C]       | Ca_Desig_LG06              | 60.127                                       |
| Ca_Desig_SNP2925 | [A/C]       | Ca_Desig_LG06              | 60.288                                       |

| <b>SNP IDs</b>  | <b>SNPs</b> | <b>Linkage Group (LGs)</b> | <b>Genetic positions (cM) of mapped SNPs</b> |
|-----------------|-------------|----------------------------|----------------------------------------------|
| Ca_Desi_SNP2926 | [A/T]       | <i>Ca_Desi_LG06</i>        | 60.352                                       |
| Ca_Desi_SNP2927 | [T/C]       | <i>Ca_Desi_LG06</i>        | 60.530                                       |
| Ca_Desi_SNP2928 | [G/A]       | <i>Ca_Desi_LG06</i>        | 60.885                                       |
| Ca_Desi_SNP2929 | [G/A]       | <i>Ca_Desi_LG06</i>        | 60.964                                       |
| Ca_Desi_SNP2930 | [C/A]       | <i>Ca_Desi_LG06</i>        | 61.967                                       |
| Ca_Desi_SNP2931 | [C/A]       | <i>Ca_Desi_LG06</i>        | 62.038                                       |
| Ca_Desi_SNP2932 | [T/C]       | <i>Ca_Desi_LG06</i>        | 62.256                                       |
| Ca_Desi_SNP2933 | [G/T]       | <i>Ca_Desi_LG06</i>        | 62.381                                       |
| Ca_Desi_SNP2934 | [C/A]       | <i>Ca_Desi_LG06</i>        | 62.480                                       |
| Ca_Desi_SNP2935 | [A/G]       | <i>Ca_Desi_LG06</i>        | 62.677                                       |
| Ca_Desi_SNP2936 | [A/T]       | <i>Ca_Desi_LG06</i>        | 62.735                                       |
| Ca_Desi_SNP2937 | [G/A]       | <i>Ca_Desi_LG06</i>        | 62.811                                       |
| Ca_Desi_SNP2938 | [G/A]       | <i>Ca_Desi_LG06</i>        | 62.986                                       |
| Ca_Desi_SNP2939 | [T/C]       | <i>Ca_Desi_LG06</i>        | 63.015                                       |
| Ca_Desi_SNP2940 | [A/G]       | <i>Ca_Desi_LG06</i>        | 63.173                                       |
| Ca_Desi_SNP2941 | [C/T]       | <i>Ca_Desi_LG06</i>        | 63.288                                       |
| Ca_Desi_SNP2942 | [T/C]       | <i>Ca_Desi_LG06</i>        | 63.290                                       |
| Ca_Desi_SNP2943 | [G/C]       | <i>Ca_Desi_LG06</i>        | 63.369                                       |
| Ca_Desi_SNP2944 | [T/C]       | <i>Ca_Desi_LG06</i>        | 63.533                                       |
| Ca_Desi_SNP2945 | [G/C]       | <i>Ca_Desi_LG06</i>        | 63.684                                       |
| Ca_Desi_SNP2946 | [T/A]       | <i>Ca_Desi_LG06</i>        | 63.888                                       |
| Ca_Desi_SNP2947 | [C/T]       | <i>Ca_Desi_LG06</i>        | 63.996                                       |
| Ca_Desi_SNP2948 | [A/G]       | <i>Ca_Desi_LG06</i>        | 64.307                                       |
| Ca_Desi_SNP2949 | [C/T]       | <i>Ca_Desi_LG06</i>        | 64.578                                       |
| Ca_Desi_SNP2950 | [T/G]       | <i>Ca_Desi_LG06</i>        | 64.725                                       |
| Ca_Desi_SNP2951 | [G/A]       | <i>Ca_Desi_LG06</i>        | 64.900                                       |
| Ca_Desi_SNP2952 | [C/G]       | <i>Ca_Desi_LG06</i>        | 65.074                                       |
| Ca_Desi_SNP2953 | [G/A]       | <i>Ca_Desi_LG06</i>        | 65.144                                       |
| Ca_Desi_SNP2954 | [T/C]       | <i>Ca_Desi_LG06</i>        | 65.806                                       |
| Ca_Desi_SNP2955 | [A/C]       | <i>Ca_Desi_LG06</i>        | 65.837                                       |
| Ca_Desi_SNP2956 | [A/G]       | <i>Ca_Desi_LG06</i>        | 66.043                                       |
| Ca_Desi_SNP2957 | [A/G]       | <i>Ca_Desi_LG06</i>        | 66.046                                       |
| Ca_Desi_SNP2958 | [T/C]       | <i>Ca_Desi_LG06</i>        | 66.092                                       |
| Ca_Desi_SNP2959 | [T/G]       | <i>Ca_Desi_LG06</i>        | 66.369                                       |
| Ca_Desi_SNP2960 | [T/G]       | <i>Ca_Desi_LG06</i>        | 66.699                                       |
| Ca_Desi_SNP2961 | [A/C]       | <i>Ca_Desi_LG06</i>        | 66.754                                       |
| Ca_Desi_SNP2962 | [T/C]       | <i>Ca_Desi_LG06</i>        | 67.060                                       |
| Ca_Desi_SNP2963 | [C/T]       | <i>Ca_Desi_LG06</i>        | 67.196                                       |
| Ca_Desi_SNP2964 | [G/T]       | <i>Ca_Desi_LG06</i>        | 67.790                                       |
| Ca_Desi_SNP2965 | [A/G]       | <i>Ca_Desi_LG06</i>        | 67.997                                       |
| Ca_Desi_SNP2966 | [C/T]       | <i>Ca_Desi_LG06</i>        | 68.102                                       |
| Ca_Desi_SNP2967 | [A/C]       | <i>Ca_Desi_LG06</i>        | 68.282                                       |
| Ca_Desi_SNP2968 | [A/G]       | <i>Ca_Desi_LG06</i>        | 68.471                                       |
| Ca_Desi_SNP2969 | [T/G]       | <i>Ca_Desi_LG06</i>        | 68.560                                       |
| Ca_Desi_SNP2970 | [G/T]       | <i>Ca_Desi_LG06</i>        | 68.564                                       |
| Ca_Desi_SNP2971 | [T/G]       | <i>Ca_Desi_LG06</i>        | 69.062                                       |
| Ca_Desi_SNP2972 | [C/G]       | <i>Ca_Desi_LG06</i>        | 69.223                                       |
| Ca_Desi_SNP2973 | [G/A]       | <i>Ca_Desi_LG06</i>        | 69.407                                       |

| <b>SNP IDs</b>  | <b>SNPs</b> | <b>Linkage Group (LGs)</b> | <b>Genetic positions (cM) of mapped SNPs</b> |
|-----------------|-------------|----------------------------|----------------------------------------------|
| Ca_Desi_SNP2974 | [T/C]       | <i>Ca_Desi_LG06</i>        | 69.439                                       |
| Ca_Desi_SNP2975 | [T/C]       | <i>Ca_Desi_LG06</i>        | 69.735                                       |
| Ca_Desi_SNP2976 | [G/A]       | <i>Ca_Desi_LG06</i>        | 69.785                                       |
| Ca_Desi_SNP2977 | [T/C]       | <i>Ca_Desi_LG06</i>        | 70.041                                       |
| Ca_Desi_SNP2978 | [T/C]       | <i>Ca_Desi_LG06</i>        | 70.071                                       |
| Ca_Desi_SNP2979 | [A/G]       | <i>Ca_Desi_LG06</i>        | 70.322                                       |
| Ca_Desi_SNP2980 | [T/C]       | <i>Ca_Desi_LG06</i>        | 70.536                                       |
| Ca_Desi_SNP2981 | [G/C]       | <i>Ca_Desi_LG06</i>        | 71.494                                       |
| Ca_Desi_SNP2982 | [A/T]       | <i>Ca_Desi_LG06</i>        | 72.057                                       |
| Ca_Desi_SNP2983 | [T/G]       | <i>Ca_Desi_LG06</i>        | 72.216                                       |
| Ca_Desi_SNP2984 | [T/C]       | <i>Ca_Desi_LG06</i>        | 72.274                                       |
| Ca_Desi_SNP2985 | [A/G]       | <i>Ca_Desi_LG06</i>        | 73.465                                       |
| Ca_Desi_SNP2986 | [A/G]       | <i>Ca_Desi_LG06</i>        | 73.544                                       |
| Ca_Desi_SNP2987 | [T/C]       | <i>Ca_Desi_LG06</i>        | 73.577                                       |
| Ca_Desi_SNP2988 | [T/G]       | <i>Ca_Desi_LG06</i>        | 73.994                                       |
| Ca_Desi_SNP2989 | [T/C]       | <i>Ca_Desi_LG06</i>        | 75.127                                       |
| Ca_Desi_SNP2990 | [G/A]       | <i>Ca_Desi_LG06</i>        | 75.986                                       |
| Ca_Desi_SNP2991 | [T/C]       | <i>Ca_Desi_LG06</i>        | 76.795                                       |
| Ca_Desi_SNP2992 | [A/G]       | <i>Ca_Desi_LG06</i>        | 76.952                                       |
| Ca_Desi_SNP2993 | [A/T]       | <i>Ca_Desi_LG06</i>        | 77.157                                       |
| Ca_Desi_SNP2994 | [C/T]       | <i>Ca_Desi_LG06</i>        | 77.497                                       |
| Ca_Desi_SNP2995 | [C/A]       | <i>Ca_Desi_LG06</i>        | 78.929                                       |
| Ca_Desi_SNP2996 | [T/A]       | <i>Ca_Desi_LG06</i>        | 79.362                                       |
| Ca_Desi_SNP2997 | [T/C]       | <i>Ca_Desi_LG06</i>        | 79.404                                       |
| Ca_Desi_SNP2998 | [C/T]       | <i>Ca_Desi_LG06</i>        | 82.775                                       |
| Ca_Desi_SNP2999 | [G/T]       | <i>Ca_Desi_LG06</i>        | 83.224                                       |
| Ca_Desi_SNP3000 | [G/A]       | <i>Ca_Desi_LG06</i>        | 84.404                                       |
| Ca_Desi_SNP3001 | [A/G]       | <i>Ca_Desi_LG06</i>        | 84.604                                       |
| Ca_Desi_SNP3002 | [A/G]       | <i>Ca_Desi_LG06</i>        | 85.048                                       |
| Ca_Desi_SNP3003 | [T/C]       | <i>Ca_Desi_LG06</i>        | 85.182                                       |
| Ca_Desi_SNP3004 | [A/G]       | <i>Ca_Desi_LG06</i>        | 86.201                                       |
| Ca_Desi_SNP3005 | [G/T]       | <i>Ca_Desi_LG06</i>        | 87.601                                       |
| Ca_Desi_SNP3006 | [T/G]       | <i>Ca_Desi_LG07</i>        | 0.000                                        |
| Ca_Desi_SNP3007 | [T/C]       | <i>Ca_Desi_LG07</i>        | 1.014                                        |
| Ca_Desi_SNP3008 | [T/C]       | <i>Ca_Desi_LG07</i>        | 1.550                                        |
| Ca_Desi_SNP3009 | [T/C]       | <i>Ca_Desi_LG07</i>        | 1.591                                        |
| Ca_Desi_SNP3010 | [A/C]       | <i>Ca_Desi_LG07</i>        | 1.652                                        |
| Ca_Desi_SNP3011 | [A/C]       | <i>Ca_Desi_LG07</i>        | 1.680                                        |
| Ca_Desi_SNP3012 | [T/C]       | <i>Ca_Desi_LG07</i>        | 2.858                                        |
| Ca_Desi_SNP3013 | [A/C]       | <i>Ca_Desi_LG07</i>        | 3.387                                        |
| Ca_Desi_SNP3014 | [C/A]       | <i>Ca_Desi_LG07</i>        | 3.414                                        |
| Ca_Desi_SNP3015 | [A/G]       | <i>Ca_Desi_LG07</i>        | 4.643                                        |
| Ca_Desi_SNP3016 | [T/G]       | <i>Ca_Desi_LG07</i>        | 4.961                                        |
| Ca_Desi_SNP3017 | [T/C]       | <i>Ca_Desi_LG07</i>        | 5.342                                        |
| Ca_Desi_SNP3018 | [C/A]       | <i>Ca_Desi_LG07</i>        | 6.094                                        |
| Ca_Desi_SNP3019 | [A/G]       | <i>Ca_Desi_LG07</i>        | 7.157                                        |
| Ca_Desi_SNP3020 | [A/C]       | <i>Ca_Desi_LG07</i>        | 7.166                                        |
| Ca_Desi_SNP3021 | [A/G]       | <i>Ca_Desi_LG07</i>        | 7.278                                        |



| <b>SNP IDs</b>   | <b>SNPs</b> | <b>Linkage Group (LGs)</b> | <b>Genetic positions (cM) of mapped SNPs</b> |
|------------------|-------------|----------------------------|----------------------------------------------|
| Ca_Desig_SNP3022 | [C/A]       | Ca_Desig_LG07              | 7.289                                        |
| Ca_Desig_SNP3023 | [A/G]       | Ca_Desig_LG07              | 7.403                                        |
| Ca_Desig_SNP3024 | [T/G]       | Ca_Desig_LG07              | 7.453                                        |
| Ca_Desig_SNP3025 | [A/C]       | Ca_Desig_LG07              | 7.687                                        |
| Ca_Desig_SNP3026 | [T/C]       | Ca_Desig_LG07              | 7.701                                        |
| Ca_Desig_SNP3027 | [A/G]       | Ca_Desig_LG07              | 7.745                                        |
| Ca_Desig_SNP3028 | [T/C]       | Ca_Desig_LG07              | 8.442                                        |
| Ca_Desig_SNP3029 | [A/C]       | Ca_Desig_LG07              | 8.444                                        |
| Ca_Desig_SNP3030 | [C/A]       | Ca_Desig_LG07              | 8.790                                        |
| Ca_Desig_SNP3031 | [T/C]       | Ca_Desig_LG07              | 8.873                                        |
| Ca_Desig_SNP3032 | [G/T]       | Ca_Desig_LG07              | 9.351                                        |
| Ca_Desig_SNP3033 | [C/G]       | Ca_Desig_LG07              | 9.932                                        |
| Ca_Desig_SNP3034 | [T/C]       | Ca_Desig_LG07              | 10.199                                       |
| Ca_Desig_SNP3035 | [C/T]       | Ca_Desig_LG07              | 10.304                                       |
| Ca_Desig_SNP3036 | [A/G]       | Ca_Desig_LG07              | 10.407                                       |
| Ca_Desig_SNP3037 | [T/C]       | Ca_Desig_LG07              | 10.424                                       |
| Ca_Desig_SNP3038 | [T/G]       | Ca_Desig_LG07              | 10.759                                       |
| Ca_Desig_SNP3039 | [A/C]       | Ca_Desig_LG07              | 10.942                                       |
| Ca_Desig_SNP3040 | [C/T]       | Ca_Desig_LG07              | 11.044                                       |
| Ca_Desig_SNP3041 | [C/A]       | Ca_Desig_LG07              | 11.363                                       |
| Ca_Desig_SNP3042 | [G/A]       | Ca_Desig_LG07              | 11.569                                       |
| Ca_Desig_SNP3043 | [T/C]       | Ca_Desig_LG07              | 12.006                                       |
| Ca_Desig_SNP3044 | [A/T]       | Ca_Desig_LG07              | 12.154                                       |
| Ca_Desig_SNP3045 | [A/G]       | Ca_Desig_LG07              | 12.285                                       |
| Ca_Desig_SNP3046 | [T/C]       | Ca_Desig_LG07              | 12.489                                       |
| Ca_Desig_SNP3047 | [G/A]       | Ca_Desig_LG07              | 13.236                                       |
| Ca_Desig_SNP3048 | [A/G]       | Ca_Desig_LG07              | 13.466                                       |
| Ca_Desig_SNP3049 | [A/G]       | Ca_Desig_LG07              | 13.613                                       |
| Ca_Desig_SNP3050 | [A/C]       | Ca_Desig_LG07              | 14.150                                       |
| Ca_Desig_SNP3051 | [A/G]       | Ca_Desig_LG07              | 14.259                                       |
| Ca_Desig_SNP3052 | [T/C]       | Ca_Desig_LG07              | 14.424                                       |
| Ca_Desig_SNP3053 | [A/C]       | Ca_Desig_LG07              | 14.724                                       |
| Ca_Desig_SNP3054 | [T/G]       | Ca_Desig_LG07              | 14.836                                       |
| Ca_Desig_SNP3055 | [T/C]       | Ca_Desig_LG07              | 15.299                                       |
| Ca_Desig_SNP3056 | [A/G]       | Ca_Desig_LG07              | 15.469                                       |
| Ca_Desig_SNP3057 | [A/C]       | Ca_Desig_LG07              | 15.869                                       |
| Ca_Desig_SNP3058 | [G/A]       | Ca_Desig_LG07              | 16.227                                       |
| Ca_Desig_SNP3059 | [A/G]       | Ca_Desig_LG07              | 16.242                                       |
| Ca_Desig_SNP3060 | [A/C]       | Ca_Desig_LG07              | 16.477                                       |
| Ca_Desig_SNP3061 | [A/G]       | Ca_Desig_LG07              | 16.485                                       |
| Ca_Desig_SNP3062 | [G/T]       | Ca_Desig_LG07              | 16.832                                       |
| Ca_Desig_SNP3063 | [T/C]       | Ca_Desig_LG07              | 16.852                                       |
| Ca_Desig_SNP3064 | [A/G]       | Ca_Desig_LG07              | 17.560                                       |
| Ca_Desig_SNP3065 | [T/G]       | Ca_Desig_LG07              | 17.648                                       |
| Ca_Desig_SNP3066 | [T/A]       | Ca_Desig_LG07              | 17.765                                       |
| Ca_Desig_SNP3067 | [T/C]       | Ca_Desig_LG07              | 17.857                                       |
| Ca_Desig_SNP3068 | [T/C]       | Ca_Desig_LG07              | 18.042                                       |
| Ca_Desig_SNP3069 | [C/A]       | Ca_Desig_LG07              | 18.335                                       |

| <b>SNP IDs</b>  | <b>SNPs</b> | <b>Linkage Group (LGs)</b> | <b>Genetic positions (cM) of mapped SNPs</b> |
|-----------------|-------------|----------------------------|----------------------------------------------|
| Ca_Desi_SNP3070 | [T/C]       | <i>Ca_Desi_LG07</i>        | 18.727                                       |
| Ca_Desi_SNP3071 | [A/C]       | <i>Ca_Desi_LG07</i>        | 19.035                                       |
| Ca_Desi_SNP3072 | [A/G]       | <i>Ca_Desi_LG07</i>        | 20.681                                       |
| Ca_Desi_SNP3073 | [T/C]       | <i>Ca_Desi_LG07</i>        | 20.687                                       |
| Ca_Desi_SNP3074 | [T/A]       | <i>Ca_Desi_LG07</i>        | 20.890                                       |
| Ca_Desi_SNP3075 | [T/C]       | <i>Ca_Desi_LG07</i>        | 21.296                                       |
| Ca_Desi_SNP3076 | [T/C]       | <i>Ca_Desi_LG07</i>        | 21.648                                       |
| Ca_Desi_SNP3077 | [C/A]       | <i>Ca_Desi_LG07</i>        | 22.457                                       |
| Ca_Desi_SNP3078 | [T/C]       | <i>Ca_Desi_LG07</i>        | 22.653                                       |
| Ca_Desi_SNP3079 | [T/C]       | <i>Ca_Desi_LG07</i>        | 22.774                                       |
| Ca_Desi_SNP3080 | [A/G]       | <i>Ca_Desi_LG07</i>        | 22.866                                       |
| Ca_Desi_SNP3081 | [G/C]       | <i>Ca_Desi_LG07</i>        | 23.190                                       |
| Ca_Desi_SNP3082 | [T/C]       | <i>Ca_Desi_LG07</i>        | 23.508                                       |
| Ca_Desi_SNP3083 | [C/A]       | <i>Ca_Desi_LG07</i>        | 23.542                                       |
| Ca_Desi_SNP3084 | [A/G]       | <i>Ca_Desi_LG07</i>        | 23.584                                       |
| Ca_Desi_SNP3085 | [A/C]       | <i>Ca_Desi_LG07</i>        | 24.208                                       |
| Ca_Desi_SNP3086 | [A/G]       | <i>Ca_Desi_LG07</i>        | 24.422                                       |
| Ca_Desi_SNP3087 | [T/C]       | <i>Ca_Desi_LG07</i>        | 24.428                                       |
| Ca_Desi_SNP3088 | [T/G]       | <i>Ca_Desi_LG07</i>        | 24.584                                       |
| Ca_Desi_SNP3089 | [T/C]       | <i>Ca_Desi_LG07</i>        | 24.832                                       |
| Ca_Desi_SNP3090 | [C/A]       | <i>Ca_Desi_LG07</i>        | 24.837                                       |
| Ca_Desi_SNP3091 | [C/A]       | <i>Ca_Desi_LG07</i>        | 24.848                                       |
| Ca_Desi_SNP3092 | [T/C]       | <i>Ca_Desi_LG07</i>        | 24.926                                       |
| Ca_Desi_SNP3093 | [C/T]       | <i>Ca_Desi_LG07</i>        | 25.333                                       |
| Ca_Desi_SNP3094 | [C/T]       | <i>Ca_Desi_LG07</i>        | 25.472                                       |
| Ca_Desi_SNP3095 | [C/G]       | <i>Ca_Desi_LG07</i>        | 26.078                                       |
| Ca_Desi_SNP3096 | [T/G]       | <i>Ca_Desi_LG07</i>        | 26.279                                       |
| Ca_Desi_SNP3097 | [C/A]       | <i>Ca_Desi_LG07</i>        | 26.369                                       |
| Ca_Desi_SNP3098 | [G/C]       | <i>Ca_Desi_LG07</i>        | 26.633                                       |
| Ca_Desi_SNP3099 | [A/G]       | <i>Ca_Desi_LG07</i>        | 26.835                                       |
| Ca_Desi_SNP3100 | [A/G]       | <i>Ca_Desi_LG07</i>        | 26.879                                       |
| Ca_Desi_SNP3101 | [T/C]       | <i>Ca_Desi_LG07</i>        | 26.885                                       |
| Ca_Desi_SNP3102 | [A/G]       | <i>Ca_Desi_LG07</i>        | 27.167                                       |
| Ca_Desi_SNP3103 | [G/A]       | <i>Ca_Desi_LG07</i>        | 27.212                                       |
| Ca_Desi_SNP3104 | [T/C]       | <i>Ca_Desi_LG07</i>        | 27.261                                       |
| Ca_Desi_SNP3105 | [G/A]       | <i>Ca_Desi_LG07</i>        | 27.284                                       |
| Ca_Desi_SNP3106 | [A/C]       | <i>Ca_Desi_LG07</i>        | 27.457                                       |
| Ca_Desi_SNP3107 | [T/G]       | <i>Ca_Desi_LG07</i>        | 27.490                                       |
| Ca_Desi_SNP3108 | [G/C]       | <i>Ca_Desi_LG07</i>        | 27.560                                       |
| Ca_Desi_SNP3109 | [A/G]       | <i>Ca_Desi_LG07</i>        | 27.689                                       |
| Ca_Desi_SNP3110 | [C/T]       | <i>Ca_Desi_LG07</i>        | 27.751                                       |
| Ca_Desi_SNP3111 | [G/A]       | <i>Ca_Desi_LG07</i>        | 27.884                                       |
| Ca_Desi_SNP3112 | [C/T]       | <i>Ca_Desi_LG07</i>        | 28.137                                       |
| Ca_Desi_SNP3113 | [T/G]       | <i>Ca_Desi_LG07</i>        | 28.215                                       |
| Ca_Desi_SNP3114 | [C/T]       | <i>Ca_Desi_LG07</i>        | 28.398                                       |
| Ca_Desi_SNP3115 | [A/C]       | <i>Ca_Desi_LG07</i>        | 28.537                                       |
| Ca_Desi_SNP3116 | [A/C]       | <i>Ca_Desi_LG07</i>        | 28.627                                       |
| Ca_Desi_SNP3117 | [A/C]       | <i>Ca_Desi_LG07</i>        | 28.724                                       |

| <b>SNP IDs</b>   | <b>SNPs</b> | <b>Linkage Group (LGs)</b> | <b>Genetic positions (cM) of mapped SNPs</b> |
|------------------|-------------|----------------------------|----------------------------------------------|
| Ca_Desig_SNP3118 | [T/G]       | Ca_Desig_LG07              | 28.746                                       |
| Ca_Desig_SNP3119 | [G/T]       | Ca_Desig_LG07              | 28.888                                       |
| Ca_Desig_SNP3120 | [C/T]       | Ca_Desig_LG07              | 29.134                                       |
| Ca_Desig_SNP3121 | [A/G]       | Ca_Desig_LG07              | 29.182                                       |
| Ca_Desig_SNP3122 | [A/C]       | Ca_Desig_LG07              | 29.504                                       |
| Ca_Desig_SNP3123 | [A/G]       | Ca_Desig_LG07              | 29.561                                       |
| Ca_Desig_SNP3124 | [A/G]       | Ca_Desig_LG07              | 29.689                                       |
| Ca_Desig_SNP3125 | [T/C]       | Ca_Desig_LG07              | 29.703                                       |
| Ca_Desig_SNP3126 | [T/C]       | Ca_Desig_LG07              | 29.822                                       |
| Ca_Desig_SNP3127 | [C/A]       | Ca_Desig_LG07              | 29.898                                       |
| Ca_Desig_SNP3128 | [G/A]       | Ca_Desig_LG07              | 30.307                                       |
| Ca_Desig_SNP3129 | [A/C]       | Ca_Desig_LG07              | 30.550                                       |
| Ca_Desig_SNP3130 | [C/T]       | Ca_Desig_LG07              | 30.789                                       |
| Ca_Desig_SNP3131 | [T/G]       | Ca_Desig_LG07              | 30.951                                       |
| Ca_Desig_SNP3132 | [T/C]       | Ca_Desig_LG07              | 31.012                                       |
| Ca_Desig_SNP3133 | [T/G]       | Ca_Desig_LG07              | 31.029                                       |
| Ca_Desig_SNP3134 | [T/G]       | Ca_Desig_LG07              | 31.040                                       |
| Ca_Desig_SNP3135 | [A/T]       | Ca_Desig_LG07              | 31.195                                       |
| Ca_Desig_SNP3136 | [C/T]       | Ca_Desig_LG07              | 31.196                                       |
| Ca_Desig_SNP3137 | [T/C]       | Ca_Desig_LG07              | 31.249                                       |
| Ca_Desig_SNP3138 | [T/C]       | Ca_Desig_LG07              | 31.396                                       |
| Ca_Desig_SNP3139 | [G/A]       | Ca_Desig_LG07              | 31.429                                       |
| Ca_Desig_SNP3140 | [A/G]       | Ca_Desig_LG07              | 31.520                                       |
| Ca_Desig_SNP3141 | [C/G]       | Ca_Desig_LG07              | 31.609                                       |
| Ca_Desig_SNP3142 | [T/G]       | Ca_Desig_LG07              | 31.838                                       |
| Ca_Desig_SNP3143 | [G/A]       | Ca_Desig_LG07              | 31.919                                       |
| Ca_Desig_SNP3144 | [T/C]       | Ca_Desig_LG07              | 32.292                                       |
| Ca_Desig_SNP3145 | [G/T]       | Ca_Desig_LG07              | 32.329                                       |
| Ca_Desig_SNP3146 | [G/A]       | Ca_Desig_LG07              | 32.371                                       |
| Ca_Desig_SNP3147 | [A/T]       | Ca_Desig_LG07              | 32.502                                       |
| Ca_Desig_SNP3148 | [T/C]       | Ca_Desig_LG07              | 32.506                                       |
| Ca_Desig_SNP3149 | [T/C]       | Ca_Desig_LG07              | 32.586                                       |
| Ca_Desig_SNP3150 | [A/G]       | Ca_Desig_LG07              | 32.997                                       |
| Ca_Desig_SNP3151 | [C/G]       | Ca_Desig_LG07              | 33.246                                       |
| Ca_Desig_SNP3152 | [A/G]       | Ca_Desig_LG07              | 33.316                                       |
| Ca_Desig_SNP3153 | [G/A]       | Ca_Desig_LG07              | 33.544                                       |
| Ca_Desig_SNP3154 | [G/A]       | Ca_Desig_LG07              | 33.718                                       |
| Ca_Desig_SNP3155 | [T/C]       | Ca_Desig_LG07              | 33.835                                       |
| Ca_Desig_SNP3156 | [A/C]       | Ca_Desig_LG07              | 34.103                                       |
| Ca_Desig_SNP3157 | [T/A]       | Ca_Desig_LG07              | 34.458                                       |
| Ca_Desig_SNP3158 | [C/T]       | Ca_Desig_LG07              | 34.818                                       |
| Ca_Desig_SNP3159 | [T/C]       | Ca_Desig_LG07              | 34.858                                       |
| Ca_Desig_SNP3160 | [A/G]       | Ca_Desig_LG07              | 35.043                                       |
| Ca_Desig_SNP3161 | [A/G]       | Ca_Desig_LG07              | 35.227                                       |
| Ca_Desig_SNP3162 | [C/T]       | Ca_Desig_LG07              | 35.292                                       |
| Ca_Desig_SNP3163 | [A/T]       | Ca_Desig_LG07              | 35.298                                       |
| Ca_Desig_SNP3164 | [A/G]       | Ca_Desig_LG07              | 35.433                                       |
| Ca_Desig_SNP3165 | [T/C]       | Ca_Desig_LG07              | 35.434                                       |

| <b>SNP IDs</b>  | <b>SNPs</b> | <b>Linkage Group (LGs)</b> | <b>Genetic positions (cM) of mapped SNPs</b> |
|-----------------|-------------|----------------------------|----------------------------------------------|
| Ca_Desi_SNP3166 | [A/T]       | <i>Ca_Desi_LG07</i>        | 35.496                                       |
| Ca_Desi_SNP3167 | [T/C]       | <i>Ca_Desi_LG07</i>        | 35.587                                       |
| Ca_Desi_SNP3168 | [G/A]       | <i>Ca_Desi_LG07</i>        | 35.875                                       |
| Ca_Desi_SNP3169 | [A/C]       | <i>Ca_Desi_LG07</i>        | 35.916                                       |
| Ca_Desi_SNP3170 | [T/G]       | <i>Ca_Desi_LG07</i>        | 36.337                                       |
| Ca_Desi_SNP3171 | [C/T]       | <i>Ca_Desi_LG07</i>        | 36.383                                       |
| Ca_Desi_SNP3172 | [T/G]       | <i>Ca_Desi_LG07</i>        | 36.436                                       |
| Ca_Desi_SNP3173 | [A/G]       | <i>Ca_Desi_LG07</i>        | 36.457                                       |
| Ca_Desi_SNP3174 | [C/A]       | <i>Ca_Desi_LG07</i>        | 36.459                                       |
| Ca_Desi_SNP3175 | [G/C]       | <i>Ca_Desi_LG07</i>        | 36.511                                       |
| Ca_Desi_SNP3176 | [A/G]       | <i>Ca_Desi_LG07</i>        | 36.530                                       |
| Ca_Desi_SNP3177 | [T/A]       | <i>Ca_Desi_LG07</i>        | 36.621                                       |
| Ca_Desi_SNP3178 | [C/T]       | <i>Ca_Desi_LG07</i>        | 36.707                                       |
| Ca_Desi_SNP3179 | [T/G]       | <i>Ca_Desi_LG07</i>        | 36.909                                       |
| Ca_Desi_SNP3180 | [C/T]       | <i>Ca_Desi_LG07</i>        | 37.333                                       |
| Ca_Desi_SNP3181 | [G/T]       | <i>Ca_Desi_LG07</i>        | 37.671                                       |
| Ca_Desi_SNP3182 | [T/G]       | <i>Ca_Desi_LG07</i>        | 37.711                                       |
| Ca_Desi_SNP3183 | [G/T]       | <i>Ca_Desi_LG07</i>        | 37.785                                       |
| Ca_Desi_SNP3184 | [A/G]       | <i>Ca_Desi_LG07</i>        | 38.125                                       |
| Ca_Desi_SNP3185 | [G/T]       | <i>Ca_Desi_LG07</i>        | 38.563                                       |
| Ca_Desi_SNP3186 | [G/A]       | <i>Ca_Desi_LG07</i>        | 38.607                                       |
| Ca_Desi_SNP3187 | [C/T]       | <i>Ca_Desi_LG07</i>        | 38.618                                       |
| Ca_Desi_SNP3188 | [A/C]       | <i>Ca_Desi_LG07</i>        | 39.289                                       |
| Ca_Desi_SNP3189 | [T/G]       | <i>Ca_Desi_LG07</i>        | 39.329                                       |
| Ca_Desi_SNP3190 | [C/T]       | <i>Ca_Desi_LG07</i>        | 39.470                                       |
| Ca_Desi_SNP3191 | [A/T]       | <i>Ca_Desi_LG07</i>        | 39.649                                       |
| Ca_Desi_SNP3192 | [G/A]       | <i>Ca_Desi_LG07</i>        | 39.672                                       |
| Ca_Desi_SNP3193 | [C/A]       | <i>Ca_Desi_LG07</i>        | 39.735                                       |
| Ca_Desi_SNP3194 | [T/G]       | <i>Ca_Desi_LG07</i>        | 40.143                                       |
| Ca_Desi_SNP3195 | [A/G]       | <i>Ca_Desi_LG07</i>        | 40.432                                       |
| Ca_Desi_SNP3196 | [C/G]       | <i>Ca_Desi_LG07</i>        | 40.563                                       |
| Ca_Desi_SNP3197 | [G/A]       | <i>Ca_Desi_LG07</i>        | 40.602                                       |
| Ca_Desi_SNP3198 | [G/A]       | <i>Ca_Desi_LG07</i>        | 40.724                                       |
| Ca_Desi_SNP3199 | [C/T]       | <i>Ca_Desi_LG07</i>        | 41.434                                       |
| Ca_Desi_SNP3200 | [C/T]       | <i>Ca_Desi_LG07</i>        | 41.561                                       |
| Ca_Desi_SNP3201 | [C/T]       | <i>Ca_Desi_LG07</i>        | 41.623                                       |
| Ca_Desi_SNP3202 | [C/T]       | <i>Ca_Desi_LG07</i>        | 41.854                                       |
| Ca_Desi_SNP3203 | [A/G]       | <i>Ca_Desi_LG07</i>        | 41.898                                       |
| Ca_Desi_SNP3204 | [G/T]       | <i>Ca_Desi_LG07</i>        | 41.977                                       |
| Ca_Desi_SNP3205 | [A/T]       | <i>Ca_Desi_LG07</i>        | 41.998                                       |
| Ca_Desi_SNP3206 | [A/C]       | <i>Ca_Desi_LG07</i>        | 41.999                                       |
| Ca_Desi_SNP3207 | [T/C]       | <i>Ca_Desi_LG07</i>        | 42.100                                       |
| Ca_Desi_SNP3208 | [T/G]       | <i>Ca_Desi_LG07</i>        | 42.522                                       |
| Ca_Desi_SNP3209 | [G/T]       | <i>Ca_Desi_LG07</i>        | 42.561                                       |
| Ca_Desi_SNP3210 | [T/G]       | <i>Ca_Desi_LG07</i>        | 42.606                                       |
| Ca_Desi_SNP3211 | [A/G]       | <i>Ca_Desi_LG07</i>        | 42.800                                       |
| Ca_Desi_SNP3212 | [T/G]       | <i>Ca_Desi_LG07</i>        | 42.862                                       |
| Ca_Desi_SNP3213 | [G/A]       | <i>Ca_Desi_LG07</i>        | 42.897                                       |

| <b>SNP IDs</b>  | <b>SNPs</b> | <b>Linkage Group (LGs)</b> | <b>Genetic positions (cM) of mapped SNPs</b> |
|-----------------|-------------|----------------------------|----------------------------------------------|
| Ca_Desi_SNP3214 | [A/G]       | <i>Ca_Desi_LG07</i>        | 42.933                                       |
| Ca_Desi_SNP3215 | [A/T]       | <i>Ca_Desi_LG07</i>        | 43.070                                       |
| Ca_Desi_SNP3216 | [T/C]       | <i>Ca_Desi_LG07</i>        | 43.071                                       |
| Ca_Desi_SNP3217 | [C/G]       | <i>Ca_Desi_LG07</i>        | 43.110                                       |
| Ca_Desi_SNP3218 | [G/A]       | <i>Ca_Desi_LG07</i>        | 43.228                                       |
| Ca_Desi_SNP3219 | [A/G]       | <i>Ca_Desi_LG07</i>        | 43.405                                       |
| Ca_Desi_SNP3220 | [T/C]       | <i>Ca_Desi_LG07</i>        | 43.529                                       |
| Ca_Desi_SNP3221 | [T/C]       | <i>Ca_Desi_LG07</i>        | 43.654                                       |
| Ca_Desi_SNP3222 | [A/G]       | <i>Ca_Desi_LG07</i>        | 43.825                                       |
| Ca_Desi_SNP3223 | [A/G]       | <i>Ca_Desi_LG07</i>        | 43.830                                       |
| Ca_Desi_SNP3224 | [T/C]       | <i>Ca_Desi_LG07</i>        | 43.866                                       |
| Ca_Desi_SNP3225 | [C/A]       | <i>Ca_Desi_LG07</i>        | 44.427                                       |
| Ca_Desi_SNP3226 | [A/C]       | <i>Ca_Desi_LG07</i>        | 44.534                                       |
| Ca_Desi_SNP3227 | [T/C]       | <i>Ca_Desi_LG07</i>        | 44.578                                       |
| Ca_Desi_SNP3228 | [C/T]       | <i>Ca_Desi_LG07</i>        | 44.735                                       |
| Ca_Desi_SNP3229 | [G/A]       | <i>Ca_Desi_LG07</i>        | 44.790                                       |
| Ca_Desi_SNP3230 | [G/A]       | <i>Ca_Desi_LG07</i>        | 44.792                                       |
| Ca_Desi_SNP3231 | [T/C]       | <i>Ca_Desi_LG07</i>        | 45.036                                       |
| Ca_Desi_SNP3232 | [A/G]       | <i>Ca_Desi_LG07</i>        | 45.282                                       |
| Ca_Desi_SNP3233 | [A/G]       | <i>Ca_Desi_LG07</i>        | 45.385                                       |
| Ca_Desi_SNP3234 | [T/C]       | <i>Ca_Desi_LG07</i>        | 45.604                                       |
| Ca_Desi_SNP3235 | [C/G]       | <i>Ca_Desi_LG07</i>        | 45.724                                       |
| Ca_Desi_SNP3236 | [C/A]       | <i>Ca_Desi_LG07</i>        | 45.791                                       |
| Ca_Desi_SNP3237 | [T/C]       | <i>Ca_Desi_LG07</i>        | 45.938                                       |
| Ca_Desi_SNP3238 | [T/C]       | <i>Ca_Desi_LG07</i>        | 47.058                                       |
| Ca_Desi_SNP3239 | [A/G]       | <i>Ca_Desi_LG07</i>        | 47.232                                       |
| Ca_Desi_SNP3240 | [C/A]       | <i>Ca_Desi_LG07</i>        | 47.290                                       |
| Ca_Desi_SNP3241 | [A/C]       | <i>Ca_Desi_LG07</i>        | 47.507                                       |
| Ca_Desi_SNP3242 | [A/G]       | <i>Ca_Desi_LG07</i>        | 48.289                                       |
| Ca_Desi_SNP3243 | [G/A]       | <i>Ca_Desi_LG07</i>        | 48.751                                       |
| Ca_Desi_SNP3244 | [C/A]       | <i>Ca_Desi_LG07</i>        | 48.954                                       |
| Ca_Desi_SNP3245 | [T/C]       | <i>Ca_Desi_LG07</i>        | 49.226                                       |
| Ca_Desi_SNP3246 | [A/G]       | <i>Ca_Desi_LG07</i>        | 49.284                                       |
| Ca_Desi_SNP3247 | [G/A]       | <i>Ca_Desi_LG07</i>        | 49.367                                       |
| Ca_Desi_SNP3248 | [A/C]       | <i>Ca_Desi_LG07</i>        | 49.377                                       |
| Ca_Desi_SNP3249 | [A/C]       | <i>Ca_Desi_LG07</i>        | 50.078                                       |
| Ca_Desi_SNP3250 | [C/T]       | <i>Ca_Desi_LG07</i>        | 50.317                                       |
| Ca_Desi_SNP3251 | [C/T]       | <i>Ca_Desi_LG07</i>        | 50.349                                       |
| Ca_Desi_SNP3252 | [T/C]       | <i>Ca_Desi_LG07</i>        | 50.395                                       |
| Ca_Desi_SNP3253 | [T/A]       | <i>Ca_Desi_LG07</i>        | 50.527                                       |
| Ca_Desi_SNP3254 | [T/G]       | <i>Ca_Desi_LG07</i>        | 51.257                                       |
| Ca_Desi_SNP3255 | [C/T]       | <i>Ca_Desi_LG07</i>        | 51.299                                       |
| Ca_Desi_SNP3256 | [A/C]       | <i>Ca_Desi_LG07</i>        | 51.846                                       |
| Ca_Desi_SNP3257 | [A/C]       | <i>Ca_Desi_LG07</i>        | 51.888                                       |
| Ca_Desi_SNP3258 | [A/T]       | <i>Ca_Desi_LG07</i>        | 51.984                                       |
| Ca_Desi_SNP3259 | [A/G]       | <i>Ca_Desi_LG07</i>        | 52.282                                       |
| Ca_Desi_SNP3260 | [T/G]       | <i>Ca_Desi_LG07</i>        | 52.435                                       |
| Ca_Desi_SNP3261 | [G/A]       | <i>Ca_Desi_LG07</i>        | 52.596                                       |

| <b>SNP IDs</b>  | <b>SNPs</b> | <b>Linkage Group (LGs)</b> | <b>Genetic positions (cM) of mapped SNPs</b> |
|-----------------|-------------|----------------------------|----------------------------------------------|
| Ca_Desi_SNP3262 | [C/A]       | <i>Ca_Desi_LG07</i>        | 53.191                                       |
| Ca_Desi_SNP3263 | [A/G]       | <i>Ca_Desi_LG07</i>        | 53.442                                       |
| Ca_Desi_SNP3264 | [G/T]       | <i>Ca_Desi_LG07</i>        | 53.482                                       |
| Ca_Desi_SNP3265 | [A/C]       | <i>Ca_Desi_LG07</i>        | 53.575                                       |
| Ca_Desi_SNP3266 | [A/G]       | <i>Ca_Desi_LG07</i>        | 53.596                                       |
| Ca_Desi_SNP3267 | [A/G]       | <i>Ca_Desi_LG07</i>        | 54.031                                       |
| Ca_Desi_SNP3268 | [T/G]       | <i>Ca_Desi_LG07</i>        | 54.097                                       |
| Ca_Desi_SNP3269 | [A/T]       | <i>Ca_Desi_LG07</i>        | 54.679                                       |
| Ca_Desi_SNP3270 | [T/G]       | <i>Ca_Desi_LG07</i>        | 54.705                                       |
| Ca_Desi_SNP3271 | [T/G]       | <i>Ca_Desi_LG07</i>        | 54.792                                       |
| Ca_Desi_SNP3272 | [C/T]       | <i>Ca_Desi_LG07</i>        | 54.802                                       |
| Ca_Desi_SNP3273 | [C/A]       | <i>Ca_Desi_LG07</i>        | 55.041                                       |
| Ca_Desi_SNP3274 | [A/C]       | <i>Ca_Desi_LG07</i>        | 55.156                                       |
| Ca_Desi_SNP3275 | [T/G]       | <i>Ca_Desi_LG07</i>        | 55.228                                       |
| Ca_Desi_SNP3276 | [T/G]       | <i>Ca_Desi_LG07</i>        | 55.255                                       |
| Ca_Desi_SNP3277 | [A/C]       | <i>Ca_Desi_LG07</i>        | 56.386                                       |
| Ca_Desi_SNP3278 | [T/G]       | <i>Ca_Desi_LG07</i>        | 56.559                                       |
| Ca_Desi_SNP3279 | [A/G]       | <i>Ca_Desi_LG07</i>        | 56.764                                       |
| Ca_Desi_SNP3280 | [C/G]       | <i>Ca_Desi_LG07</i>        | 56.802                                       |
| Ca_Desi_SNP3281 | [T/A]       | <i>Ca_Desi_LG07</i>        | 57.275                                       |
| Ca_Desi_SNP3282 | [A/C]       | <i>Ca_Desi_LG07</i>        | 57.373                                       |
| Ca_Desi_SNP3283 | [A/G]       | <i>Ca_Desi_LG07</i>        | 57.622                                       |
| Ca_Desi_SNP3284 | [C/T]       | <i>Ca_Desi_LG07</i>        | 57.719                                       |
| Ca_Desi_SNP3285 | [A/G]       | <i>Ca_Desi_LG07</i>        | 57.843                                       |
| Ca_Desi_SNP3286 | [A/G]       | <i>Ca_Desi_LG07</i>        | 57.959                                       |
| Ca_Desi_SNP3287 | [A/C]       | <i>Ca_Desi_LG07</i>        | 58.030                                       |
| Ca_Desi_SNP3288 | [A/G]       | <i>Ca_Desi_LG07</i>        | 58.060                                       |
| Ca_Desi_SNP3289 | [A/G]       | <i>Ca_Desi_LG07</i>        | 58.150                                       |
| Ca_Desi_SNP3290 | [C/T]       | <i>Ca_Desi_LG07</i>        | 58.197                                       |
| Ca_Desi_SNP3291 | [T/G]       | <i>Ca_Desi_LG07</i>        | 58.469                                       |
| Ca_Desi_SNP3292 | [A/G]       | <i>Ca_Desi_LG07</i>        | 58.513                                       |
| Ca_Desi_SNP3293 | [T/C]       | <i>Ca_Desi_LG07</i>        | 58.553                                       |
| Ca_Desi_SNP3294 | [A/G]       | <i>Ca_Desi_LG07</i>        | 58.736                                       |
| Ca_Desi_SNP3295 | [T/C]       | <i>Ca_Desi_LG07</i>        | 59.121                                       |
| Ca_Desi_SNP3296 | [A/T]       | <i>Ca_Desi_LG07</i>        | 59.198                                       |
| Ca_Desi_SNP3297 | [T/C]       | <i>Ca_Desi_LG07</i>        | 59.353                                       |
| Ca_Desi_SNP3298 | [A/G]       | <i>Ca_Desi_LG07</i>        | 59.561                                       |
| Ca_Desi_SNP3299 | [A/G]       | <i>Ca_Desi_LG07</i>        | 59.719                                       |
| Ca_Desi_SNP3300 | [A/C]       | <i>Ca_Desi_LG07</i>        | 59.969                                       |
| Ca_Desi_SNP3301 | [C/T]       | <i>Ca_Desi_LG07</i>        | 60.242                                       |
| Ca_Desi_SNP3302 | [A/G]       | <i>Ca_Desi_LG07</i>        | 60.316                                       |
| Ca_Desi_SNP3303 | [A/C]       | <i>Ca_Desi_LG07</i>        | 61.140                                       |
| Ca_Desi_SNP3304 | [T/C]       | <i>Ca_Desi_LG07</i>        | 61.778                                       |
| Ca_Desi_SNP3305 | [C/G]       | <i>Ca_Desi_LG07</i>        | 61.887                                       |
| Ca_Desi_SNP3306 | [A/G]       | <i>Ca_Desi_LG07</i>        | 62.086                                       |
| Ca_Desi_SNP3307 | [A/G]       | <i>Ca_Desi_LG07</i>        | 62.367                                       |
| Ca_Desi_SNP3308 | [A/G]       | <i>Ca_Desi_LG07</i>        | 62.484                                       |
| Ca_Desi_SNP3309 | [C/G]       | <i>Ca_Desi_LG07</i>        | 62.695                                       |

| <b>SNP IDs</b>   | <b>SNPs</b> | <b>Linkage Group (LGs)</b> | <b>Genetic positions (cM) of mapped SNPs</b> |
|------------------|-------------|----------------------------|----------------------------------------------|
| Ca_Desig_SNP3310 | [C/T]       | Ca_Desig_LG07              | 62.993                                       |
| Ca_Desig_SNP3311 | [A/G]       | Ca_Desig_LG07              | 63.055                                       |
| Ca_Desig_SNP3312 | [A/G]       | Ca_Desig_LG07              | 63.067                                       |
| Ca_Desig_SNP3313 | [G/A]       | Ca_Desig_LG07              | 63.674                                       |
| Ca_Desig_SNP3314 | [T/C]       | Ca_Desig_LG07              | 63.792                                       |
| Ca_Desig_SNP3315 | [A/C]       | Ca_Desig_LG07              | 63.926                                       |
| Ca_Desig_SNP3316 | [T/C]       | Ca_Desig_LG07              | 64.185                                       |
| Ca_Desig_SNP3317 | [T/C]       | Ca_Desig_LG07              | 64.304                                       |
| Ca_Desig_SNP3318 | [A/C]       | Ca_Desig_LG07              | 64.925                                       |
| Ca_Desig_SNP3319 | [G/A]       | Ca_Desig_LG07              | 64.944                                       |
| Ca_Desig_SNP3320 | [A/G]       | Ca_Desig_LG07              | 65.266                                       |
| Ca_Desig_SNP3321 | [T/G]       | Ca_Desig_LG07              | 65.326                                       |
| Ca_Desig_SNP3322 | [G/A]       | Ca_Desig_LG07              | 65.994                                       |
| Ca_Desig_SNP3323 | [C/T]       | Ca_Desig_LG07              | 66.154                                       |
| Ca_Desig_SNP3324 | [C/T]       | Ca_Desig_LG07              | 66.564                                       |
| Ca_Desig_SNP3325 | [C/A]       | Ca_Desig_LG07              | 67.069                                       |
| Ca_Desig_SNP3326 | [C/T]       | Ca_Desig_LG07              | 67.259                                       |
| Ca_Desig_SNP3327 | [T/C]       | Ca_Desig_LG07              | 67.260                                       |
| Ca_Desig_SNP3328 | [A/G]       | Ca_Desig_LG07              | 67.562                                       |
| Ca_Desig_SNP3329 | [T/A]       | Ca_Desig_LG07              | 68.509                                       |
| Ca_Desig_SNP3330 | [A/G]       | Ca_Desig_LG07              | 68.885                                       |
| Ca_Desig_SNP3331 | [T/A]       | Ca_Desig_LG07              | 68.901                                       |
| Ca_Desig_SNP3332 | [A/G]       | Ca_Desig_LG07              | 70.137                                       |
| Ca_Desig_SNP3333 | [C/G]       | Ca_Desig_LG07              | 70.874                                       |
| Ca_Desig_SNP3334 | [C/T]       | Ca_Desig_LG07              | 71.415                                       |
| Ca_Desig_SNP3335 | [T/G]       | Ca_Desig_LG07              | 71.902                                       |
| Ca_Desig_SNP3336 | [C/A]       | Ca_Desig_LG07              | 72.125                                       |
| Ca_Desig_SNP3337 | [G/A]       | Ca_Desig_LG07              | 72.506                                       |
| Ca_Desig_SNP3338 | [A/G]       | Ca_Desig_LG07              | 73.168                                       |
| Ca_Desig_SNP3339 | [A/G]       | Ca_Desig_LG07              | 74.352                                       |
| Ca_Desig_SNP3340 | [T/C]       | Ca_Desig_LG07              | 75.210                                       |
| Ca_Desig_SNP3341 | [T/C]       | Ca_Desig_LG07              | 75.253                                       |
| Ca_Desig_SNP3342 | [T/G]       | Ca_Desig_LG07              | 75.491                                       |
| Ca_Desig_SNP3343 | [C/T]       | Ca_Desig_LG07              | 77.740                                       |
| Ca_Desig_SNP3344 | [G/T]       | Ca_Desig_LG07              | 87.821                                       |
| Ca_Desig_SNP3345 | [C/A]       | Ca_Desig_LG08              | 0.000                                        |
| Ca_Desig_SNP3346 | [A/G]       | Ca_Desig_LG08              | 0.340                                        |
| Ca_Desig_SNP3347 | [C/A]       | Ca_Desig_LG08              | 0.603                                        |
| Ca_Desig_SNP3348 | [A/G]       | Ca_Desig_LG08              | 1.078                                        |
| Ca_Desig_SNP3349 | [A/G]       | Ca_Desig_LG08              | 1.621                                        |
| Ca_Desig_SNP3350 | [T/C]       | Ca_Desig_LG08              | 2.357                                        |
| Ca_Desig_SNP3351 | [A/G]       | Ca_Desig_LG08              | 2.731                                        |
| Ca_Desig_SNP3352 | [G/A]       | Ca_Desig_LG08              | 3.079                                        |
| Ca_Desig_SNP3353 | [T/A]       | Ca_Desig_LG08              | 3.922                                        |
| Ca_Desig_SNP3354 | [G/A]       | Ca_Desig_LG08              | 5.042                                        |
| Ca_Desig_SNP3355 | [A/G]       | Ca_Desig_LG08              | 5.183                                        |
| Ca_Desig_SNP3356 | [T/C]       | Ca_Desig_LG08              | 5.705                                        |
| Ca_Desig_SNP3357 | [A/G]       | Ca_Desig_LG08              | 7.258                                        |

| <b>SNP IDs</b>  | <b>SNPs</b> | <b>Linkage Group (LGs)</b> | <b>Genetic positions (cM) of mapped SNPs</b> |
|-----------------|-------------|----------------------------|----------------------------------------------|
| Ca_Desi_SNP3358 | [A/G]       | <i>Ca_Desi_LG08</i>        | 8.242                                        |
| Ca_Desi_SNP3359 | [G/A]       | <i>Ca_Desi_LG08</i>        | 8.558                                        |
| Ca_Desi_SNP3360 | [G/A]       | <i>Ca_Desi_LG08</i>        | 8.729                                        |
| Ca_Desi_SNP3361 | [C/A]       | <i>Ca_Desi_LG08</i>        | 8.873                                        |
| Ca_Desi_SNP3362 | [C/G]       | <i>Ca_Desi_LG08</i>        | 9.540                                        |
| Ca_Desi_SNP3363 | [T/C]       | <i>Ca_Desi_LG08</i>        | 9.661                                        |
| Ca_Desi_SNP3364 | [C/A]       | <i>Ca_Desi_LG08</i>        | 10.113                                       |
| Ca_Desi_SNP3365 | [T/G]       | <i>Ca_Desi_LG08</i>        | 10.320                                       |
| Ca_Desi_SNP3366 | [A/T]       | <i>Ca_Desi_LG08</i>        | 10.572                                       |
| Ca_Desi_SNP3367 | [A/C]       | <i>Ca_Desi_LG08</i>        | 10.632                                       |
| Ca_Desi_SNP3368 | [A/G]       | <i>Ca_Desi_LG08</i>        | 10.879                                       |
| Ca_Desi_SNP3369 | [A/G]       | <i>Ca_Desi_LG08</i>        | 11.100                                       |
| Ca_Desi_SNP3370 | [C/T]       | <i>Ca_Desi_LG08</i>        | 11.262                                       |
| Ca_Desi_SNP3371 | [A/C]       | <i>Ca_Desi_LG08</i>        | 11.366                                       |
| Ca_Desi_SNP3372 | [A/G]       | <i>Ca_Desi_LG08</i>        | 11.725                                       |
| Ca_Desi_SNP3373 | [T/G]       | <i>Ca_Desi_LG08</i>        | 11.745                                       |
| Ca_Desi_SNP3374 | [T/G]       | <i>Ca_Desi_LG08</i>        | 12.047                                       |
| Ca_Desi_SNP3375 | [G/A]       | <i>Ca_Desi_LG08</i>        | 12.064                                       |
| Ca_Desi_SNP3376 | [T/C]       | <i>Ca_Desi_LG08</i>        | 13.112                                       |
| Ca_Desi_SNP3377 | [A/G]       | <i>Ca_Desi_LG08</i>        | 13.656                                       |
| Ca_Desi_SNP3378 | [T/C]       | <i>Ca_Desi_LG08</i>        | 13.832                                       |
| Ca_Desi_SNP3379 | [G/A]       | <i>Ca_Desi_LG08</i>        | 14.383                                       |
| Ca_Desi_SNP3380 | [C/T]       | <i>Ca_Desi_LG08</i>        | 14.916                                       |
| Ca_Desi_SNP3381 | [T/C]       | <i>Ca_Desi_LG08</i>        | 15.680                                       |
| Ca_Desi_SNP3382 | [T/C]       | <i>Ca_Desi_LG08</i>        | 16.660                                       |
| Ca_Desi_SNP3383 | [T/C]       | <i>Ca_Desi_LG08</i>        | 17.169                                       |
| Ca_Desi_SNP3384 | [G/C]       | <i>Ca_Desi_LG08</i>        | 18.339                                       |
| Ca_Desi_SNP3385 | [C/T]       | <i>Ca_Desi_LG08</i>        | 18.690                                       |
| Ca_Desi_SNP3386 | [A/T]       | <i>Ca_Desi_LG08</i>        | 19.091                                       |
| Ca_Desi_SNP3387 | [T/C]       | <i>Ca_Desi_LG08</i>        | 19.508                                       |
| Ca_Desi_SNP3388 | [T/C]       | <i>Ca_Desi_LG08</i>        | 19.650                                       |
| Ca_Desi_SNP3389 | [G/C]       | <i>Ca_Desi_LG08</i>        | 19.651                                       |
| Ca_Desi_SNP3390 | [G/T]       | <i>Ca_Desi_LG08</i>        | 19.733                                       |
| Ca_Desi_SNP3391 | [C/G]       | <i>Ca_Desi_LG08</i>        | 20.146                                       |
| Ca_Desi_SNP3392 | [T/C]       | <i>Ca_Desi_LG08</i>        | 20.174                                       |
| Ca_Desi_SNP3393 | [G/A]       | <i>Ca_Desi_LG08</i>        | 20.558                                       |
| Ca_Desi_SNP3394 | [G/C]       | <i>Ca_Desi_LG08</i>        | 20.582                                       |
| Ca_Desi_SNP3395 | [T/G]       | <i>Ca_Desi_LG08</i>        | 20.724                                       |
| Ca_Desi_SNP3396 | [G/A]       | <i>Ca_Desi_LG08</i>        | 21.005                                       |
| Ca_Desi_SNP3397 | [T/C]       | <i>Ca_Desi_LG08</i>        | 21.044                                       |
| Ca_Desi_SNP3398 | [C/A]       | <i>Ca_Desi_LG08</i>        | 21.049                                       |
| Ca_Desi_SNP3399 | [A/G]       | <i>Ca_Desi_LG08</i>        | 21.137                                       |
| Ca_Desi_SNP3400 | [T/G]       | <i>Ca_Desi_LG08</i>        | 21.329                                       |
| Ca_Desi_SNP3401 | [C/T]       | <i>Ca_Desi_LG08</i>        | 21.382                                       |
| Ca_Desi_SNP3402 | [C/T]       | <i>Ca_Desi_LG08</i>        | 21.882                                       |
| Ca_Desi_SNP3403 | [A/T]       | <i>Ca_Desi_LG08</i>        | 21.921                                       |
| Ca_Desi_SNP3404 | [C/T]       | <i>Ca_Desi_LG08</i>        | 21.949                                       |
| Ca_Desi_SNP3405 | [T/C]       | <i>Ca_Desi_LG08</i>        | 21.953                                       |



| <b>SNP IDs</b>   | <b>SNPs</b> | <b>Linkage Group (LGs)</b> | <b>Genetic positions (cM) of mapped SNPs</b> |
|------------------|-------------|----------------------------|----------------------------------------------|
| Ca_Desig_SNP3406 | [T/A]       | Ca_Desig_LG08              | 21.971                                       |
| Ca_Desig_SNP3407 | [G/A]       | Ca_Desig_LG08              | 21.976                                       |
| Ca_Desig_SNP3408 | [G/T]       | Ca_Desig_LG08              | 22.014                                       |
| Ca_Desig_SNP3409 | [C/G]       | Ca_Desig_LG08              | 22.207                                       |
| Ca_Desig_SNP3410 | [T/C]       | Ca_Desig_LG08              | 22.232                                       |
| Ca_Desig_SNP3411 | [A/G]       | Ca_Desig_LG08              | 22.455                                       |
| Ca_Desig_SNP3412 | [C/T]       | Ca_Desig_LG08              | 22.610                                       |
| Ca_Desig_SNP3413 | [A/G]       | Ca_Desig_LG08              | 22.777                                       |
| Ca_Desig_SNP3414 | [A/C]       | Ca_Desig_LG08              | 22.789                                       |
| Ca_Desig_SNP3415 | [C/T]       | Ca_Desig_LG08              | 22.790                                       |
| Ca_Desig_SNP3416 | [G/A]       | Ca_Desig_LG08              | 22.818                                       |
| Ca_Desig_SNP3417 | [A/C]       | Ca_Desig_LG08              | 22.912                                       |
| Ca_Desig_SNP3418 | [G/A]       | Ca_Desig_LG08              | 23.656                                       |
| Ca_Desig_SNP3419 | [T/G]       | Ca_Desig_LG08              | 23.664                                       |
| Ca_Desig_SNP3420 | [T/A]       | Ca_Desig_LG08              | 23.935                                       |
| Ca_Desig_SNP3421 | [C/T]       | Ca_Desig_LG08              | 24.262                                       |
| Ca_Desig_SNP3422 | [C/A]       | Ca_Desig_LG08              | 24.434                                       |
| Ca_Desig_SNP3423 | [G/A]       | Ca_Desig_LG08              | 24.547                                       |
| Ca_Desig_SNP3424 | [T/G]       | Ca_Desig_LG08              | 24.855                                       |
| Ca_Desig_SNP3425 | [T/C]       | Ca_Desig_LG08              | 25.610                                       |
| Ca_Desig_SNP3426 | [T/G]       | Ca_Desig_LG08              | 25.753                                       |
| Ca_Desig_SNP3427 | [A/T]       | Ca_Desig_LG08              | 25.756                                       |
| Ca_Desig_SNP3428 | [G/A]       | Ca_Desig_LG08              | 25.812                                       |
| Ca_Desig_SNP3429 | [A/G]       | Ca_Desig_LG08              | 26.103                                       |
| Ca_Desig_SNP3430 | [C/G]       | Ca_Desig_LG08              | 26.439                                       |
| Ca_Desig_SNP3431 | [G/A]       | Ca_Desig_LG08              | 26.439                                       |
| Ca_Desig_SNP3432 | [A/G]       | Ca_Desig_LG08              | 26.516                                       |
| Ca_Desig_SNP3433 | [G/T]       | Ca_Desig_LG08              | 26.835                                       |
| Ca_Desig_SNP3434 | [T/G]       | Ca_Desig_LG08              | 27.063                                       |
| Ca_Desig_SNP3435 | [A/G]       | Ca_Desig_LG08              | 27.550                                       |
| Ca_Desig_SNP3436 | [C/T]       | Ca_Desig_LG08              | 27.788                                       |
| Ca_Desig_SNP3437 | [G/T]       | Ca_Desig_LG08              | 27.834                                       |
| Ca_Desig_SNP3438 | [A/G]       | Ca_Desig_LG08              | 27.909                                       |
| Ca_Desig_SNP3439 | [T/G]       | Ca_Desig_LG08              | 27.981                                       |
| Ca_Desig_SNP3440 | [C/T]       | Ca_Desig_LG08              | 28.612                                       |
| Ca_Desig_SNP3441 | [C/G]       | Ca_Desig_LG08              | 28.997                                       |
| Ca_Desig_SNP3442 | [C/G]       | Ca_Desig_LG08              | 29.105                                       |
| Ca_Desig_SNP3443 | [A/C]       | Ca_Desig_LG08              | 29.244                                       |
| Ca_Desig_SNP3444 | [G/A]       | Ca_Desig_LG08              | 29.389                                       |
| Ca_Desig_SNP3445 | [A/G]       | Ca_Desig_LG08              | 29.455                                       |
| Ca_Desig_SNP3446 | [T/G]       | Ca_Desig_LG08              | 30.042                                       |
| Ca_Desig_SNP3447 | [A/C]       | Ca_Desig_LG08              | 30.299                                       |
| Ca_Desig_SNP3448 | [T/C]       | Ca_Desig_LG08              | 30.430                                       |
| Ca_Desig_SNP3449 | [T/C]       | Ca_Desig_LG08              | 30.550                                       |
| Ca_Desig_SNP3450 | [A/C]       | Ca_Desig_LG08              | 30.629                                       |
| Ca_Desig_SNP3451 | [A/G]       | Ca_Desig_LG08              | 31.181                                       |
| Ca_Desig_SNP3452 | [T/A]       | Ca_Desig_LG08              | 32.666                                       |
| Ca_Desig_SNP3453 | [A/T]       | Ca_Desig_LG08              | 32.873                                       |

| <b>SNP IDs</b>  | <b>SNPs</b> | <b>Linkage Group (LGs)</b> | <b>Genetic positions (cM) of mapped SNPs</b> |
|-----------------|-------------|----------------------------|----------------------------------------------|
| Ca_Desi_SNP3454 | [C/G]       | <i>Ca_Desi_LG08</i>        | 34.621                                       |
| Ca_Desi_SNP3455 | [A/G]       | <i>Ca_Desi_LG08</i>        | 34.668                                       |
| Ca_Desi_SNP3456 | [T/G]       | <i>Ca_Desi_LG08</i>        | 34.738                                       |
| Ca_Desi_SNP3457 | [T/G]       | <i>Ca_Desi_LG08</i>        | 35.325                                       |
| Ca_Desi_SNP3458 | [T/C]       | <i>Ca_Desi_LG08</i>        | 35.810                                       |
| Ca_Desi_SNP3459 | [G/A]       | <i>Ca_Desi_LG08</i>        | 36.055                                       |
| Ca_Desi_SNP3460 | [A/G]       | <i>Ca_Desi_LG08</i>        | 36.209                                       |
| Ca_Desi_SNP3461 | [A/G]       | <i>Ca_Desi_LG08</i>        | 36.253                                       |
| Ca_Desi_SNP3462 | [T/G]       | <i>Ca_Desi_LG08</i>        | 36.340                                       |
| Ca_Desi_SNP3463 | [G/A]       | <i>Ca_Desi_LG08</i>        | 36.542                                       |
| Ca_Desi_SNP3464 | [C/T]       | <i>Ca_Desi_LG08</i>        | 36.803                                       |
| Ca_Desi_SNP3465 | [C/T]       | <i>Ca_Desi_LG08</i>        | 37.290                                       |
| Ca_Desi_SNP3466 | [A/C]       | <i>Ca_Desi_LG08</i>        | 37.963                                       |
| Ca_Desi_SNP3467 | [A/G]       | <i>Ca_Desi_LG08</i>        | 38.257                                       |
| Ca_Desi_SNP3468 | [T/G]       | <i>Ca_Desi_LG08</i>        | 38.628                                       |
| Ca_Desi_SNP3469 | [A/G]       | <i>Ca_Desi_LG08</i>        | 38.657                                       |
| Ca_Desi_SNP3470 | [T/G]       | <i>Ca_Desi_LG08</i>        | 38.824                                       |
| Ca_Desi_SNP3471 | [T/C]       | <i>Ca_Desi_LG08</i>        | 39.091                                       |
| Ca_Desi_SNP3472 | [C/T]       | <i>Ca_Desi_LG08</i>        | 39.843                                       |
| Ca_Desi_SNP3473 | [T/C]       | <i>Ca_Desi_LG08</i>        | 40.210                                       |
| Ca_Desi_SNP3474 | [A/C]       | <i>Ca_Desi_LG08</i>        | 40.402                                       |
| Ca_Desi_SNP3475 | [T/G]       | <i>Ca_Desi_LG08</i>        | 40.777                                       |
| Ca_Desi_SNP3476 | [A/G]       | <i>Ca_Desi_LG08</i>        | 40.793                                       |
| Ca_Desi_SNP3477 | [A/C]       | <i>Ca_Desi_LG08</i>        | 41.009                                       |
| Ca_Desi_SNP3478 | [T/G]       | <i>Ca_Desi_LG08</i>        | 41.031                                       |
| Ca_Desi_SNP3479 | [A/T]       | <i>Ca_Desi_LG08</i>        | 41.254                                       |
| Ca_Desi_SNP3480 | [A/G]       | <i>Ca_Desi_LG08</i>        | 41.740                                       |
| Ca_Desi_SNP3481 | [A/G]       | <i>Ca_Desi_LG08</i>        | 42.006                                       |
| Ca_Desi_SNP3482 | [G/A]       | <i>Ca_Desi_LG08</i>        | 42.361                                       |
| Ca_Desi_SNP3483 | [A/C]       | <i>Ca_Desi_LG08</i>        | 42.377                                       |
| Ca_Desi_SNP3484 | [A/C]       | <i>Ca_Desi_LG08</i>        | 42.485                                       |
| Ca_Desi_SNP3485 | [A/G]       | <i>Ca_Desi_LG08</i>        | 42.492                                       |
| Ca_Desi_SNP3486 | [A/G]       | <i>Ca_Desi_LG08</i>        | 42.569                                       |
| Ca_Desi_SNP3487 | [T/G]       | <i>Ca_Desi_LG08</i>        | 43.068                                       |
| Ca_Desi_SNP3488 | [T/C]       | <i>Ca_Desi_LG08</i>        | 43.329                                       |
| Ca_Desi_SNP3489 | [A/C]       | <i>Ca_Desi_LG08</i>        | 43.764                                       |
| Ca_Desi_SNP3490 | [C/T]       | <i>Ca_Desi_LG08</i>        | 44.015                                       |
| Ca_Desi_SNP3491 | [T/G]       | <i>Ca_Desi_LG08</i>        | 44.194                                       |
| Ca_Desi_SNP3492 | [A/T]       | <i>Ca_Desi_LG08</i>        | 44.663                                       |
| Ca_Desi_SNP3493 | [A/G]       | <i>Ca_Desi_LG08</i>        | 44.882                                       |
| Ca_Desi_SNP3494 | [G/A]       | <i>Ca_Desi_LG08</i>        | 45.071                                       |
| Ca_Desi_SNP3495 | [C/G]       | <i>Ca_Desi_LG08</i>        | 45.440                                       |
| Ca_Desi_SNP3496 | [T/C]       | <i>Ca_Desi_LG08</i>        | 45.879                                       |
| Ca_Desi_SNP3497 | [C/A]       | <i>Ca_Desi_LG08</i>        | 45.989                                       |
| Ca_Desi_SNP3498 | [G/T]       | <i>Ca_Desi_LG08</i>        | 46.059                                       |
| Ca_Desi_SNP3499 | [A/C]       | <i>Ca_Desi_LG08</i>        | 46.342                                       |
| Ca_Desi_SNP3500 | [C/T]       | <i>Ca_Desi_LG08</i>        | 46.352                                       |
| Ca_Desi_SNP3501 | [C/T]       | <i>Ca_Desi_LG08</i>        | 47.010                                       |

| <b>SNP IDs</b>   | <b>SNPs</b> | <b>Linkage Group (LGs)</b> | <b>Genetic positions (cM) of mapped SNPs</b> |
|------------------|-------------|----------------------------|----------------------------------------------|
| Ca_Desig_SNP3502 | [T/C]       | Ca_Desig_LG08              | 47.164                                       |
| Ca_Desig_SNP3503 | [G/A]       | Ca_Desig_LG08              | 47.438                                       |
| Ca_Desig_SNP3504 | [A/G]       | Ca_Desig_LG08              | 47.454                                       |
| Ca_Desig_SNP3505 | [A/C]       | Ca_Desig_LG08              | 47.750                                       |
| Ca_Desig_SNP3506 | [T/A]       | Ca_Desig_LG08              | 47.947                                       |
| Ca_Desig_SNP3507 | [C/A]       | Ca_Desig_LG08              | 48.426                                       |
| Ca_Desig_SNP3508 | [C/A]       | Ca_Desig_LG08              | 48.559                                       |
| Ca_Desig_SNP3509 | [T/A]       | Ca_Desig_LG08              | 49.495                                       |
| Ca_Desig_SNP3510 | [A/G]       | Ca_Desig_LG08              | 49.591                                       |
| Ca_Desig_SNP3511 | [T/G]       | Ca_Desig_LG08              | 49.635                                       |
| Ca_Desig_SNP3512 | [T/C]       | Ca_Desig_LG08              | 49.676                                       |
| Ca_Desig_SNP3513 | [G/A]       | Ca_Desig_LG08              | 49.792                                       |
| Ca_Desig_SNP3514 | [G/C]       | Ca_Desig_LG08              | 49.829                                       |
| Ca_Desig_SNP3515 | [T/C]       | Ca_Desig_LG08              | 49.938                                       |
| Ca_Desig_SNP3516 | [T/C]       | Ca_Desig_LG08              | 50.067                                       |
| Ca_Desig_SNP3517 | [T/C]       | Ca_Desig_LG08              | 50.074                                       |
| Ca_Desig_SNP3518 | [T/C]       | Ca_Desig_LG08              | 50.174                                       |
| Ca_Desig_SNP3519 | [A/C]       | Ca_Desig_LG08              | 50.202                                       |
| Ca_Desig_SNP3520 | [T/G]       | Ca_Desig_LG08              | 50.204                                       |
| Ca_Desig_SNP3521 | [A/C]       | Ca_Desig_LG08              | 50.549                                       |
| Ca_Desig_SNP3522 | [A/T]       | Ca_Desig_LG08              | 50.617                                       |
| Ca_Desig_SNP3523 | [C/A]       | Ca_Desig_LG08              | 50.623                                       |
| Ca_Desig_SNP3524 | [T/C]       | Ca_Desig_LG08              | 51.029                                       |
| Ca_Desig_SNP3525 | [G/T]       | Ca_Desig_LG08              | 51.542                                       |
| Ca_Desig_SNP3526 | [G/T]       | Ca_Desig_LG08              | 51.556                                       |
| Ca_Desig_SNP3527 | [A/G]       | Ca_Desig_LG08              | 51.751                                       |
| Ca_Desig_SNP3528 | [G/C]       | Ca_Desig_LG08              | 51.842                                       |
| Ca_Desig_SNP3529 | [A/C]       | Ca_Desig_LG08              | 51.862                                       |
| Ca_Desig_SNP3530 | [C/A]       | Ca_Desig_LG08              | 52.211                                       |
| Ca_Desig_SNP3531 | [C/G]       | Ca_Desig_LG08              | 52.456                                       |
| Ca_Desig_SNP3532 | [A/T]       | Ca_Desig_LG08              | 52.468                                       |
| Ca_Desig_SNP3533 | [A/C]       | Ca_Desig_LG08              | 53.645                                       |
| Ca_Desig_SNP3534 | [C/A]       | Ca_Desig_LG08              | 53.727                                       |
| Ca_Desig_SNP3535 | [T/G]       | Ca_Desig_LG08              | 53.793                                       |
| Ca_Desig_SNP3536 | [T/G]       | Ca_Desig_LG08              | 54.055                                       |
| Ca_Desig_SNP3537 | [T/C]       | Ca_Desig_LG08              | 54.212                                       |
| Ca_Desig_SNP3538 | [A/G]       | Ca_Desig_LG08              | 54.218                                       |
| Ca_Desig_SNP3539 | [A/G]       | Ca_Desig_LG08              | 54.457                                       |
| Ca_Desig_SNP3540 | [C/A]       | Ca_Desig_LG08              | 54.497                                       |
| Ca_Desig_SNP3541 | [C/G]       | Ca_Desig_LG08              | 54.553                                       |
| Ca_Desig_SNP3542 | [A/T]       | Ca_Desig_LG08              | 54.593                                       |
| Ca_Desig_SNP3543 | [T/C]       | Ca_Desig_LG08              | 54.839                                       |
| Ca_Desig_SNP3544 | [A/G]       | Ca_Desig_LG08              | 54.904                                       |
| Ca_Desig_SNP3545 | [C/T]       | Ca_Desig_LG08              | 55.002                                       |
| Ca_Desig_SNP3546 | [C/T]       | Ca_Desig_LG08              | 55.050                                       |
| Ca_Desig_SNP3547 | [A/C]       | Ca_Desig_LG08              | 55.244                                       |
| Ca_Desig_SNP3548 | [A/G]       | Ca_Desig_LG08              | 55.939                                       |
| Ca_Desig_SNP3549 | [C/G]       | Ca_Desig_LG08              | 56.131                                       |

| <b>SNP IDs</b>   | <b>SNPs</b> | <b>Linkage Group (LGs)</b> | <b>Genetic positions (cM) of mapped SNPs</b> |
|------------------|-------------|----------------------------|----------------------------------------------|
| Ca_Desig_SNP3550 | [G/A]       | Ca_Desig_LG08              | 56.287                                       |
| Ca_Desig_SNP3551 | [A/G]       | Ca_Desig_LG08              | 56.294                                       |
| Ca_Desig_SNP3552 | [C/G]       | Ca_Desig_LG08              | 56.429                                       |
| Ca_Desig_SNP3553 | [A/C]       | Ca_Desig_LG08              | 56.482                                       |
| Ca_Desig_SNP3554 | [T/G]       | Ca_Desig_LG08              | 56.577                                       |
| Ca_Desig_SNP3555 | [T/G]       | Ca_Desig_LG08              | 57.041                                       |
| Ca_Desig_SNP3556 | [A/G]       | Ca_Desig_LG08              | 57.270                                       |
| Ca_Desig_SNP3557 | [T/C]       | Ca_Desig_LG08              | 57.292                                       |
| Ca_Desig_SNP3558 | [T/G]       | Ca_Desig_LG08              | 57.626                                       |
| Ca_Desig_SNP3559 | [T/G]       | Ca_Desig_LG08              | 57.855                                       |
| Ca_Desig_SNP3560 | [A/G]       | Ca_Desig_LG08              | 57.861                                       |
| Ca_Desig_SNP3561 | [T/A]       | Ca_Desig_LG08              | 58.066                                       |
| Ca_Desig_SNP3562 | [T/G]       | Ca_Desig_LG08              | 58.139                                       |
| Ca_Desig_SNP3563 | [T/A]       | Ca_Desig_LG08              | 59.089                                       |
| Ca_Desig_SNP3564 | [T/A]       | Ca_Desig_LG08              | 59.130                                       |
| Ca_Desig_SNP3565 | [T/C]       | Ca_Desig_LG08              | 59.490                                       |
| Ca_Desig_SNP3566 | [G/A]       | Ca_Desig_LG08              | 59.519                                       |
| Ca_Desig_SNP3567 | [A/G]       | Ca_Desig_LG08              | 59.585                                       |
| Ca_Desig_SNP3568 | [G/A]       | Ca_Desig_LG08              | 59.613                                       |
| Ca_Desig_SNP3569 | [A/G]       | Ca_Desig_LG08              | 59.913                                       |
| Ca_Desig_SNP3570 | [G/T]       | Ca_Desig_LG08              | 59.921                                       |
| Ca_Desig_SNP3571 | [T/C]       | Ca_Desig_LG08              | 60.149                                       |
| Ca_Desig_SNP3572 | [C/T]       | Ca_Desig_LG08              | 60.533                                       |
| Ca_Desig_SNP3573 | [T/A]       | Ca_Desig_LG08              | 60.605                                       |
| Ca_Desig_SNP3574 | [C/T]       | Ca_Desig_LG08              | 60.784                                       |
| Ca_Desig_SNP3575 | [A/G]       | Ca_Desig_LG08              | 60.871                                       |
| Ca_Desig_SNP3576 | [A/G]       | Ca_Desig_LG08              | 60.894                                       |
| Ca_Desig_SNP3577 | [G/A]       | Ca_Desig_LG08              | 60.958                                       |
| Ca_Desig_SNP3578 | [G/A]       | Ca_Desig_LG08              | 61.006                                       |
| Ca_Desig_SNP3579 | [G/A]       | Ca_Desig_LG08              | 61.503                                       |
| Ca_Desig_SNP3580 | [A/C]       | Ca_Desig_LG08              | 61.786                                       |
| Ca_Desig_SNP3581 | [T/C]       | Ca_Desig_LG08              | 61.989                                       |
| Ca_Desig_SNP3582 | [A/G]       | Ca_Desig_LG08              | 62.020                                       |
| Ca_Desig_SNP3583 | [T/C]       | Ca_Desig_LG08              | 62.119                                       |
| Ca_Desig_SNP3584 | [C/T]       | Ca_Desig_LG08              | 62.240                                       |
| Ca_Desig_SNP3585 | [A/G]       | Ca_Desig_LG08              | 62.590                                       |
| Ca_Desig_SNP3586 | [T/C]       | Ca_Desig_LG08              | 62.997                                       |
| Ca_Desig_SNP3587 | [A/G]       | Ca_Desig_LG08              | 63.151                                       |
| Ca_Desig_SNP3588 | [T/C]       | Ca_Desig_LG08              | 63.406                                       |
| Ca_Desig_SNP3589 | [A/G]       | Ca_Desig_LG08              | 63.731                                       |
| Ca_Desig_SNP3590 | [A/G]       | Ca_Desig_LG08              | 63.815                                       |
| Ca_Desig_SNP3591 | [T/G]       | Ca_Desig_LG08              | 63.850                                       |
| Ca_Desig_SNP3592 | [T/G]       | Ca_Desig_LG08              | 64.099                                       |
| Ca_Desig_SNP3593 | [A/G]       | Ca_Desig_LG08              | 64.489                                       |
| Ca_Desig_SNP3594 | [G/T]       | Ca_Desig_LG08              | 64.662                                       |
| Ca_Desig_SNP3595 | [A/G]       | Ca_Desig_LG08              | 64.671                                       |
| Ca_Desig_SNP3596 | [A/G]       | Ca_Desig_LG08              | 64.776                                       |
| Ca_Desig_SNP3597 | [G/A]       | Ca_Desig_LG08              | 64.925                                       |

| <b>SNP IDs</b>  | <b>SNPs</b> | <b>Linkage Group (LGs)</b> | <b>Genetic positions (cM) of mapped SNPs</b> |
|-----------------|-------------|----------------------------|----------------------------------------------|
| Ca_Desi_SNP3598 | [C/A]       | <i>Ca_Desi_LG08</i>        | 65.180                                       |
| Ca_Desi_SNP3599 | [A/T]       | <i>Ca_Desi_LG08</i>        | 65.229                                       |
| Ca_Desi_SNP3600 | [T/G]       | <i>Ca_Desi_LG08</i>        | 65.498                                       |
| Ca_Desi_SNP3601 | [A/G]       | <i>Ca_Desi_LG08</i>        | 65.499                                       |
| Ca_Desi_SNP3602 | [A/G]       | <i>Ca_Desi_LG08</i>        | 65.529                                       |
| Ca_Desi_SNP3603 | [T/A]       | <i>Ca_Desi_LG08</i>        | 65.657                                       |
| Ca_Desi_SNP3604 | [A/G]       | <i>Ca_Desi_LG08</i>        | 66.029                                       |
| Ca_Desi_SNP3605 | [G/T]       | <i>Ca_Desi_LG08</i>        | 66.290                                       |
| Ca_Desi_SNP3606 | [T/C]       | <i>Ca_Desi_LG08</i>        | 66.881                                       |
| Ca_Desi_SNP3607 | [A/G]       | <i>Ca_Desi_LG08</i>        | 67.785                                       |
| Ca_Desi_SNP3608 | [A/G]       | <i>Ca_Desi_LG08</i>        | 67.838                                       |
| Ca_Desi_SNP3609 | [A/G]       | <i>Ca_Desi_LG08</i>        | 68.508                                       |
| Ca_Desi_SNP3610 | [T/G]       | <i>Ca_Desi_LG08</i>        | 69.895                                       |
| Ca_Desi_SNP3611 | [C/A]       | <i>Ca_Desi_LG08</i>        | 69.976                                       |
| Ca_Desi_SNP3612 | [A/G]       | <i>Ca_Desi_LG08</i>        | 70.526                                       |
| Ca_Desi_SNP3613 | [T/C]       | <i>Ca_Desi_LG08</i>        | 71.006                                       |
| Ca_Desi_SNP3614 | [T/G]       | <i>Ca_Desi_LG08</i>        | 71.265                                       |
| Ca_Desi_SNP3615 | [T/C]       | <i>Ca_Desi_LG08</i>        | 71.606                                       |
| Ca_Desi_SNP3616 | [C/T]       | <i>Ca_Desi_LG08</i>        | 71.844                                       |
| Ca_Desi_SNP3617 | [A/C]       | <i>Ca_Desi_LG08</i>        | 73.520                                       |
| Ca_Desi_SNP3618 | [A/C]       | <i>Ca_Desi_LG08</i>        | 76.736                                       |
| Ca_Desi_SNP3619 | [T/G]       | <i>Ca_Desi_LG08</i>        | 77.683                                       |
| Ca_Desi_SNP3620 | [A/G]       | <i>Ca_Desi_LG08</i>        | 78.156                                       |
| Ca_Desi_SNP3621 | [G/A]       | <i>Ca_Desi_LG08</i>        | 78.509                                       |
| Ca_Desi_SNP3622 | [T/C]       | <i>Ca_Desi_LG08</i>        | 79.375                                       |
| Ca_Desi_SNP3623 | [A/T]       | <i>Ca_Desi_LG08</i>        | 80.766                                       |
| Ca_Desi_SNP3624 | [A/C]       | <i>Ca_Desi_LG08</i>        | 81.334                                       |
| Ca_Desi_SNP3625 | [T/C]       | <i>Ca_Desi_LG08</i>        | 89.085                                       |

**Table S2: Accessions selected for PH trait association mapping**

| Sl. No. | Accession Numbers | Cultivar types | Geographical origin  | Biological status             |
|---------|-------------------|----------------|----------------------|-------------------------------|
| 1       | ICC5590           | <i>Desi</i>    | India                | Breeding/Research material    |
| 2       | ICC6013           | <i>Desi</i>    | India                | Breeding/Research material    |
| 3       | ICC5002           | <i>Desi</i>    | India                | Breeding/Research material    |
| 4       | ICC7184           | <i>Desi</i>    | Turkey               | Traditional cultivar/Landrace |
| 5       | ICC4926           | <i>Desi</i>    | India                | Breeding/Research material    |
| 6       | ICC4657           | <i>Desi</i>    | India                | Traditional cultivar/Landrace |
| 7       | ICC12299          | <i>Desi</i>    | Nepal                | Traditional cultivar/Landrace |
| 8       | ICC456            | <i>Desi</i>    | India                | Traditional cultivar/Landrace |
| 9       | ICC12726          | <i>Desi</i>    | Ethiopia             | Traditional cultivar/Landrace |
| 10      | ICC11944          | <i>Desi</i>    | Nepal                | Traditional cultivar/Landrace |
| 11      | ICC11498          | <i>Desi</i>    | India                | Traditional cultivar/Landrace |
| 12      | ICC9942           | <i>Desi</i>    | India                | Traditional cultivar/Landrace |
| 13      | ICC2072           | <i>Desi</i>    | India                | Traditional cultivar/Landrace |
| 14      | ICC9737           | <i>Desi</i>    | Afghanistan          | Traditional cultivar/Landrace |
| 15      | ICC9002           | <i>Desi</i>    | Iran                 | Traditional cultivar/Landrace |
| 16      | ICC16374          | <i>Desi</i>    | Malawi               | Breeding material             |
| 17      | ICC12028          | <i>Desi</i>    | Mexico               | Traditional cultivar/Landrace |
| 18      | ICC8318           | <i>Desi</i>    | India                | Traditional cultivar/Landrace |
| 19      | ICC15610          | <i>Desi</i>    | India                | Traditional cultivar/Landrace |
| 20      | ICC4918           | <i>Desi</i>    | India                | Advanced cultivar             |
| 21      | ICC1836           | <i>Desi</i>    | India                | Traditional cultivar/Landrace |
| 22      | ICC15061          | <i>Desi</i>    | India                | Traditional cultivar/Landrace |
| 23      | ICC13523          | <i>Kabuli</i>  | Iran                 | Traditional cultivar/Landrace |
| 24      | ICC15802          | <i>Kabuli</i>  | Syria                | Traditional cultivar/Landrace |
| 25      | ICC13077          | <i>Kabuli</i>  | India                | Traditional cultivar/Landrace |
| 26      | ICC15264          | <i>Kabuli</i>  | Iran                 | Traditional cultivar/Landrace |
| 27      | ICC7308           | <i>Kabuli</i>  | Peru                 | Traditional cultivar/Landrace |
| 28      | ICC15435          | <i>Kabuli</i>  | Morocco              | Traditional cultivar/Landrace |
| 29      | ICC7295           | <i>Kabuli</i>  | Tunisia              | Traditional cultivar/Landrace |
| 30      | ICC12328          | <i>Kabuli</i>  | Cyprus               | Traditional cultivar/Landrace |
| 31      | ICC14446          | <i>Kabuli</i>  | Italy                | Traditional cultivar/Landrace |
| 32      | ICC10755          | <i>Kabuli</i>  | Turkey               | Traditional cultivar/Landrace |
| 33      | ICC14190          | <i>Kabuli</i>  | India                | Traditional cultivar/Landrace |
| 34      | ICC8042           | <i>Kabuli</i>  | Iran                 | Traditional cultivar/Landrace |
| 35      | ICC8261           | <i>Kabuli</i>  | Turkey               | Traditional cultivar/Landrace |
| 36      | ICC15333          | <i>Kabuli</i>  | Iran                 | Traditional cultivar/Landrace |
| 37      | ICC15512          | <i>Kabuli</i>  | Morocco              | Traditional cultivar/Landrace |
| 38      | ICC10884          | <i>Kabuli</i>  | Ethiopia             | Traditional cultivar/Landrace |
| 39      | ICC15551          | <i>Kabuli</i>  | Australia            | Traditional cultivar/Landrace |
| 40      | ICC15725          | <i>Kabuli</i>  | Syrian Arab Republic | Traditional cultivar/Landrace |
| 41      | ICC6204           | <i>Kabuli</i>  | Spain                | Traditional cultivar/Landrace |
| 42      | ICC6210           | <i>Kabuli</i>  | Spain                | Traditional cultivar/Landrace |
| 43      | ICC7654           | <i>Kabuli</i>  | Turkey               | Traditional cultivar/Landrace |
| 44      | ICC11847          | <i>Kabuli</i>  | Chile                | Traditional cultivar/Landrace |
| 45      | ICC11749          | <i>Kabuli</i>  | Chile                | Traditional cultivar/Landrace |
| 46      | ICC14199          | <i>Kabuli</i>  | Mexico               | Breeding material             |
| 47      | ICC15518          | <i>Kabuli</i>  | Morocco              | Traditional cultivar/Landrace |
| 48      | ICC16814          | <i>Kabuli</i>  | Portugal             | Traditional cultivar/Landrace |

| <b>Sl. No.</b> | <b>Accession Numbers</b> | <b>Cultivar types</b> | <b>Geographical origin</b> | <b>Biological status</b>      |
|----------------|--------------------------|-----------------------|----------------------------|-------------------------------|
| 49             | ICC16811                 | <i>Kabuli</i>         | Portugal                   | Traditional cultivar/Landrace |
| 50             | ICC6253                  | <i>Kabuli</i>         | Morocco                    | Traditional cultivar/Landrace |
| 51             | ICC11301                 | <i>Kabuli</i>         | United States of America   | Traditional cultivar/Landrace |
| 52             | ICC10749                 | <i>Kabuli</i>         | Turkey                     | Traditional cultivar/Landrace |
| 53             | ICC14216                 | <i>Kabuli</i>         | Mexico                     | Breeding/Research material    |
| 54             | ICC14203                 | <i>Kabuli</i>         | Mexico                     | Traditional cultivar/Landrace |
| 55             | ICC11742                 | <i>Kabuli</i>         | Chile                      | Traditional cultivar/Landrace |
| 56             | ICC13821                 | <i>Kabuli</i>         | Ethiopia                   | Traditional cultivar/Landrace |
| 57             | ICC14462                 | <i>Kabuli</i>         | India                      | Traditional cultivar/Landrace |
| 58             | ICC14220                 | <i>Kabuli</i>         | Kenya                      | Traditional cultivar/Landrace |
| 59             | ICC15944                 | <i>Kabuli</i>         | United States of America   | Advanced/Improved cultivar    |
| 60             | ICC11303                 | <i>Kabuli</i>         | Chile                      | Traditional cultivar/Landrace |
| 61             | ICC12034                 | <i>Kabuli</i>         | Mexico                     | Advanced/Improved cultivar    |
| 62             | ICC7346                  | <i>Kabuli</i>         | Mexico                     | Breeding/Research material    |
| 63             | ICC15994                 | <i>Kabuli</i>         | Spain                      | Traditional cultivar/Landrace |
| 64             | ICC18591                 | <i>Kabuli</i>         | Mexico                     | Traditional cultivar/Landrace |
| 65             | ICC8155                  | <i>Kabuli</i>         | United States of America   | Traditional cultivar/Landrace |
